# Supplementary material for: Comparative Mitogenomic Analysis Reveals Dynamics of Intron Within and Between Tricholoma Species and Phylogeny of Basidiomycota
Source: Front Genet. 2021 Feb 15;12:534871. doi: 10.3389/fgene.2021.534871 (PMC7917209; doi:10.3389/fgene.2021.534871)
Supplement: Supplementary file 1 [file Data_Sheet_1.xlsx]

## Sheet: Table S1
Table S1 Comparison on mitogenomes between the five Tricholoma species
Item	T. matsutake	T. bakamatsutake	T. terreum	T. flavovirens	T. saponaceum
Accession number	MN873034	MN873035	MN873036	MN873037	MN873038
Genome size (bp)	74865	103090	80705	49480	94261
GC content (%)	20.57	22.31	22.99	22.62	23.03
AT skew	0.02	0.02	0.01	-0.002	-0.008
GC skew	0.07	0.08	0.05	0.034	0.009
No. of PCGs	19	25	23	20	42
No. of introns	10	26	11	1	9
Intronic ORFs	6	22	9	1	8
No. of rRNA genes	2	2	2	2	2
No. of tRNA genes	27	19	27	26	29
Protein coding region (bp)	17904	20805	22980	18705	35025
Intronic region (bp)	13455	38113	13840	1164	11961
RNA region (bp)	9453	8915	9380	9267	9637
Intergenic region (bp)	34053	35257	34505	20344	37638

## Sheet: Table S2
Table S2 Gene features and organization of the five Tricholoma mitogenomes
T. matsutake SCYJ1						T. bakamatsutake						T. terreum						T. flavovirens						T. saponaceum
Gene	Start	Stop	Length	Intergenic nucleotides (bp)	Notes	Gene	Start	Stop	Length	Intergenic nucleotides (bp)	Notes	Gene	Start	Stop	Length	Intergenic nucleotides (bp)	Notes	Gene	Start	Stop	Length	Intergenic nucleotides (bp)	Notes	Gene	Start	Stop	Length	Intergenic nucleotides (bp)	Notes
orf290	277	1149	873		LAGLIDADG homing endonuclease	orf342	208	1236	1029		GIY-YIG homing endonuclease	orf361	610	1695	1086		LAGLIDADG homing endonuclease	cox1	1	1584	1584	-32		orf320	302	1264	963		LAGLIDADG homing endonuclease
orf360	1683	2765	1083		LAGLIDADG homing endonuclease	orf371	1840	2955	1116		GIY-YIG homing endonuclease	orf296	2022	2912	891		hypothetical protein	orf442	1553	2881	1329	606	hypothetical protein	orf145	2199	2636	438		hypothetical protein
orf343	3256	4287	1032		LAGLIDADG homing endonuclease	orf878	3439	6075	2637		putative reverse transcriptase	orf325	3051	4028	978		LAGLIDADG homing endonuclease	nad4	3488	4939	1452	1589		orf349	3181	4230	1050		LAGLIDADG homing endonuclease
orf338	4530	5546	1017		LAGLIDADG homing endonuclease	orf301	6247	7152	906		LAGLIDADG homing endonuclease	orf340	4463	5485	1023		LAGLIDADG homing endonuclease	nad6	6529	7164	636	403		orf342	4567	5595	1029		LAGLIDADG homing endonuclease
cox1	1	6390	6390	24		orf684	7883	9937	2055		LAGLIDADG homing endonuclease	cox1	1	6254	6254	350		nad2	7568	9307	1740	0		orf342	5833	6861	1029		LAGLIDADG homing endonuclease
exon1	1	275	275			orf331	10074	11069	996		LAGLIDADG homing endonuclease	exon1	1	609	609			nad3	9308	9679	372	1064		cox1	1	7798	7798	-32
exon2	1577	1681	105			orf344	11330	12364	1035		LAGLIDADG homing endonuclease	exon2	2934	3049	116			atp9	10965	10744	222	872		exon1	1	275	275
exon3	2922	3255	334			orf259	12669	13448	780		LAGLIDADG homing endonuclease	exon3	4294	4462	169			orf142	11838	12266	429	170	DNA polymerase 2	exon2	2847	3180	334
exon4	4350	4529	180			orf378	13919	15055	1137		LAGLIDADG homing endonuclease	exon4	5565	6254	690			orf470	12437	13849	1413	240	hypothetical protein	exon3	4462	4566	105
exon5	5701	6390	690			orf316	15213	16163	951		GIY-YIG homing endonuclease	intron1	610	2933	2324		Group IB	orf141	14090	14515	426	174	hypothetical protein	exon4	5653	5832	180
intron1	276	1576	1301		Group IB(3')	orf274	16587	17411	825		GIY-YIG homing endonuclease	intron2	3050	4293	1244		Group IB	trnG(tcc)	14690	14760	71	481		exon5	7109	7798	690
intron2	1682	2921	1240		Group IB	cox1	1	18056	17984	24		intron3	4463	5564	1102		Group IB	trnR(tcg)	15314	15242	73	77		intron1	276	2846	2571		Group IB
intron3	3256	4349	1094		Group IB	exon1	1	206	206			orf154	6605	7069	465	417	hypothetical protein	trnC(gca)	15465	15392	74	315		intron2	3181	4461	1281		Group IB
intron4	4530	5700	1171		Group IB(3')	exon2	1557	1837	281			orf303	7487	8398	912	2232	hypothetical protein	trnR(tct)	15853	15781	73	487		intron3	4567	5652	1086		Group IB
orf401	6415	7620	1206	1290	hypothetical protein	exon3	3260	3438	179			atp9	10852	10631	222	310		trnL(tag)	16423	16341	83	99		intron4	5833	7108	1276		Group IB
nad4	8911	10362	1452	1089		exon4	6208	6244	37			rns	11163	13270	2108	778		trnW(cca)	16596	16523	74	80		orf437	7767	9080	1314	595	hypothetical protein
orf99	11452	11751	300	1428	hypothetical protein	exon5	7872	7882	11			trnV(tac)	14049	14120	72	2410		atp8	16835	16677	159	627		orf234	9676	10380	705	600	hypothetical protein
nad6	13180	13815	636	325		exon6	10062	10072	11			orf541	16531	18156	1626	379	hypothetical protein	atp6	18230	17463	768	899		nad4	10981	12432	1452	1437
rns	14141	16283	2143	219		exon7	11161	11329	169			nad3	18904	18536	369	-1		rns	19130	21257	2128	101		nad6	13870	14496	627	26
trnV(tac)	16503	16574	72	1326		exon8	12597	12667	71			nad2	20643	18904	1740	328		trnV(tac)	21359	21430	72	1574		orf510	14523	16055	1533	252	hypothetical protein
trnD(gtc)	17973	17901	73	814		exon9	13765	13918	154			orf473	22393	20972	1422	687	DNA polymerase 2	orf104	23319	23005	315	65	DNA polymerase 2	nad2	16308	17993	1686	0
trnI(gat)	18788	18858	71	50		exon10	15075	15211	137			orf309	24010	23081	930	1281	DNA polymerase 2	trnD(gtc)	23457	23385	73	359		nad3	17994	18452	459	150	458
trnI(gat)	18909	18979	71	839		exon11	16544	16586	43			trnR(tct)	25364	25292	73	434		trnI(gat)	23817	23887	71	1077		orf137	18603	19016	414	66	hypothetical protein
nad1	19819	22342	2524	491		exon12	17772	18056	285			trnL(tag)	25882	25799	84	109		nad1	24965	25981	1017	673		orf137	19083	19496	414	335	hypothetical protein
exon1	19819	20115	297		297	intron1	207	1556	1350		Group IB	trnW(cca)	26065	25992	74	129		trnI(gat)	26655	26725	71	331		orf293	19832	20713	882	711	hypothetical protein
exon2	21623	22342	720		720	intron2	1838	3259	1422		Group IB	atp8	26353	26195	159	809		cob	27057	28214	1158	772		orf205	21425	22042	618	510	DNA polymerase
intron1	20116	21622	1507		Group IB	intron3	3439	6207	2769		Group II	trnC(gca)	27163	27237	75	237		cox2	28987	29748	762	516		orf181	22553	23098	546	510	DNA polymerase
trnI(gat)	22834	22904	71	1900		intron4	6245	7871	1627		Group ID	trnR(tcg)	27475	27547	73	539		cox3	30265	31074	810	589		orf181	23609	24154	546	103	hypothetical protein
trnT(ggt)	24805	24876	72	695		intron5	7883	10061	2179		Group IB(3')	atp6	28854	28087	768	520		nad4L	31664	31930	267	-1		trnM(cat)	24330	24258	73	90
cob	25572	28024	2453	1137		intron6	10073	11160	1088		Group IB	nad6	29995	29375	621	2184		nad5	31930	33924	1995	1083		trnR(tct)	24421	24493	73	575
exon1	25572	26391	820			intron7	11330	12596	1267		Group IB(3')	nad4	33631	32180	1452	2013		rps3	35008	36858	1851	85		trnC(gca)	25069	25142	74	265
exon2	27684	28024	341			intron8	12668	13764	1097		Group IB	orf488	37111	35645	1467	604	hypothetical protein	trnH(gtg)	36944	37016	73	922		trnR(tcg)	25408	25480	73	639
intron1	26392	27683	1292		Group IB	intron9	13919	15074	1156		Group IB	trnW(tca)	37716	37788	73	315		trnM(cat)	37939	38011	73	467		rns	26120	28349	2230	642
orf378	30687	31823	1137		LAGLIDADG homing endonuclease	intron10	15212	16543	1332		Group IB	trnG(tcc)	38104	38174	71	442		rnl	38479	44837	6359	119		trnV(tac)	28992	29063	72	38
cox2	29162	33686	4525	720		intron11	16587	17771	1185		Group IA	orf248	38617	39363	747	407	DNA polymerase 2	exon1	38479	43136	4658			orf362	29102	30190	1089	239	hypothetical protein
exon1	29162	29485	324			orf167	18081	18584	504	81	hypothetical protein	orf169	39771	40280	510	559	hypothetical protein	exon2	44301	44837	537			orf102	30430	30738	309	372	hypothetical protein
exon2	30648	30686	39			orf237	18666	19379	714	2903	hypothetical protein	trnD(gtc)	40912	40840	73	762		intron1	43137	44300	1164			trnR(tct)	31111	31183	73	109
exon3	33288	33686	399			nad4	22283	24894	2612	2685		trnI(gat)	41675	41745	71	1541		orf108	43720	44046	327		LAGLIDADG homing endonuclease	orf279	31293	32132	840	2407	hypothetical protein
intron1	29486	30647	1162		Group IB	exon1	22283	22908	626			nad1	43287	45546	2260	1716		trnA(tgc)	44957	45027	71	644		orf117	34893	34540	354	-1	hypothetical protein
intron2	30687	33287	2601		Group ID	exon2	24069	24894	826			exon1	43287	43583	297			trnF(gaa)	45672	45743	72	287		orf171	35408	34893	516	568	hypothetical protein
cox3	34407	35216	810	727		intron1	22909	24068	1160		Group IB	exon2	44827	45546	720			trnT(tgt)	46031	46102	72	135		orf548	37623	35977	1647	73	hypothetical protein
nad4L	35944	36210	267	-1		nad6	27580	28215	636	329		intron1	43584	44826	1243		Group IB	trnQ(ttg)	46238	46311	74	285		trnD(gtc)	37769	37697	73	1108
nad5	36210	39253	3044	1025		rns	28545	30725	2181	213		trnI(gat)	47263	47333	71	414		trnK(ttt)	46597	46669	73	183		orf453	40239	38878	1362	594	hypothetical protein
exon1	36210	36626	417			trnV(tac)	30939	31010	72	1272		cob	47748	48914	1167	907		trnY(gta)	46853	46936	84	504		orf252	42371	41613	759		LAGLIDADG homing endonuclease
exon2	37676	39253	1578			orf108	32283	32609	327	152	hypothetical protein	orf340	51413	52435	1023		LAGLIDADG homing endonuclease	trnM(cat)	47441	47513	73	69		cox2	42695	40834	1862	927
intron1	36627	37675	1049		Group IB	trnD(gtc)	32834	32762	73	754		cox2	49822	53279	3458	1049		trnS(tga)	47583	47668	86	327		exon1	42695	42372	324
rps3	40279	42318	2040	1904		trnI(gat)	33589	33659	71	1789		exon1	49822	50142	321			trnP(tgg)	47996	48070	75	285		exon2	41271	40834	438
trnH(gtg)	44295	44223	73	1259		orf826	35548	38028	2481		hypothetical protein	exon2	51374	51412	39			trnN(gtt)	48356	48428	73	163		intron1	42371	41272	1100		Group IB
orf335	45555	46562	1008	3660	hypothetical protein	orf262	38486	39274	789		LAGLIDADG homing endonuclease	exon3	52881	53279	399			trnL(taa)	48592	48676	85	60		orf143	45168	44737	432		hypothetical protein
rnl	50223	56553	6331	137		orf289	39848	40717	870		GIY-YIG homing endonuclease	intron1	50143	51373	1231		Group IB	trnM(cat)	48737	48807	71	198		cob	45953	43623	2331	329
exon1	50223	55072	4850			orf254	41065	41829	765		LAGLIDADG homing endonuclease	intron2	51413	52880	1468		Group ID	trnE(ttc)	49006	49077	72	214		exon1	45953	45358	596
exon2	56111	56553	443			orf528	42473	44059	1587		intron-encoded RNA maturase bI4	cox3	54329	55138	810	996		trnS(gct)	49292	49373	82	107		exon2	44184	43623	562
intron1	55073	56110	1038			cob	35449	45974	10526	2477		nad4L	56135	56401	267	-1								intron1	45357	44185	1173		Group IB
orf101	55500	55805	306		LAGLIDADG homing endonuclease	exon1	35449	35547	99			nad5	56401	58395	1995	842								trnI(gat)	46353	46283	71	591
trnA(tgc)	56691	56761	71	679		exon2	38207	38485	279			rps3	59238	61208	1971	87								nad1	49434	46945	2490	1880
trnF(gaa)	57441	57512	72	334		exon3	39833	39847	15			trnH(gtg)	61296	61368	73	1612								exon1	49434	49138	297
trnT(tgt)	57847	57918	72	154		exon4	41029	41064	36			trnM(cat)	62981	63053	73	288								exon2	47664	46945	720
trnQ(ttg)	58073	58146	74	339		exon5	42146	42472	327			rnl	63342	73820	10479	119								intron1	49137	47665	1473		Group IB
trnK(ttt)	58486	58558	73	747		exon6	44199	44262	64			exon1	63342	66829	3488									trnI(gat)	51385	51315	71	386
trnY(gta)	59306	59389	84	666		exon7	45610	45974	365			exon2	67794	67929	136									orf110	52104	51772	333	407	DNA polymerase 2
trnM(cat)	60056	60128	73	136		intron1	35548	38206	2659		Group II	exon3	68624	69676	1053									trnM(cat)	52584	52512	73	923
trnS(tga)	60265	60351	87	504		intron2	38486	39832	1347		Group ID	exon4	70831	70881	51									trnH(gtg)	53580	53508	73	119
trnP(tgg)	60856	60930	75	333		intron3	39848	41028	1181		Group ID	exon5	72066	72148	83									rps3	55556	53700	1857	720
trnN(gtt)	61264	61336	73	147		intron4	41065	42145	1081		Group ID	exon6	73381	73820	440									nad5	58265	56277	1989	-1
trnL(taa)	61484	61568	85	89		intron5	42473	44198	1726		Group I(derived)	intron1	66830	67793	964									nad4L	58531	58265	267	964
trnM(cat)	61658	61728	71	1603		intron6	44263	45609	1347		Group IB	intron2	67930	68623	694									cox3	60305	59496	810	1132
trnG(tcc)	63332	63402	71	370		orf268	50029	50835	807		LAGLIDADG homing endonuclease	intron3	69677	70830	1154									trnM(cat)	61508	61438	71	71
nad2	63773	65536	1764	0		cox2	48542	52565	4114	882		intron4	70882	72065	1184									trnL(taa)	61664	61580	85	220
nad3	65537	65926	390	262		exon1	48542	48865	324			intron5	72149	73380	1232									trnN(gtt)	61957	61885	73	487
orf119	66548	66189	360	511	hypothetical protein	exon2	49990	50028	39			orf176	67089	67619	531		LAGLIDADG homing endonuclease							trnP(tgg)	62519	62445	75	447
trnR(tcg)	67060	67132	73	372		exon3	52167	52565	399			orf237	70002	70715	714		LAGLIDADG homing endonuclease							trnS(tga)	63053	62967	87	57
trnC(gca)	67581	67505	77	1019		intron1	48866	49989	1124		Group IB	orf177	71083	71616	534		LAGLIDADG homing endonuclease							trnM(cat)	63183	63111	73	323
trnR(tct)	68672	68601	72	567		intron2	50029	52166	2138		Group ID	orf229	72364	73053	690		LAGLIDADG homing endonuclease							trnY(gta)	63590	63507	84	319
trnL(tag)	69322	69240	83	114		orf235	53802	54509	708		LAGLIDADG homing endonuclease	trnA(tgc)	73940	74010	71	726								trnK(ttt)	63982	63910	73	386
trnW(cca)	69510	69437	74	546		orf99	55348	55647	300		LAGLIDADG homing endonuclease	trnF(gaa)	74737	74808	72	418								trnQ(ttg)	64442	64369	74	101
atp8	70215	70057	159	475		orf223	55731	56402	672		LAGLIDADG homing endonuclease	trnT(tgt)	75227	75298	72	115								trnT(tgt)	64615	64544	72	396
atp6	71461	70691	771	1388		cox3	53358	57087	3730	751		trnQ(ttg)	75414	75487	74	370								trnF(gaa)	65083	65012	72	737
atp9	72850	73071	222	1337		exon1	53358	53801	444			trnK(ttt)	75858	75930	73	325								trnA(tgc)	65891	65821	71	190
trnE(ttc)	74409	74480	72	41		exon2	55099	55291	193			trnY(gta)	76256	76339	84	770								rnl	73326	66082	7245	512
trnS(gct)	74522	74603	82	262		exon3	56915	57087	173			trnM(cat)	77110	77182	73	192								exon1	73326	68652	4675
						intron1	53802	55098	1297		Group ID	trnS(tga)	77375	77461	87	1371								exon2	68292	68243	50
						intron2	55292	56914	1623		Group IA	trnP(tgg)	78833	78907	75	303								exon3	66600	66082	519
						nad4L	57839	58105	267	-1		trnN(gtt)	79211	79283	73	188								intron1	68651	68293	359
						nad5	58105	60099	1995	1077		trnL(taa)	79472	79556	85	56								intron2	68242	66601	1642
						rps3	61177	63234	2058	1967		trnM(cat)	79613	79684	72	313								orf294	67958	67074	885		LAGLIDADG homing endonuclease
						trnH(gtg)	65274	65202	73	1284		trnE(ttc)	79998	80069	72	345								orf234	73839	74543	705	-43	LAGLIDADG homing endonuclease
						orf333	66559	67560	1002	3107	hypothetical protein	trnS(gct)	80415	80496	82	209								orf263	74501	75292	792	1120	LAGLIDADG homing endonuclease
						rnl	70668	80949	10282	147														orf366	76413	77513	1101	230	hypothetical protein
						exon1	70668	71605	938															orf288	77744	78610	867	93	hypothetical protein
						exon2	73054	75698	2645															orf123	78704	79075	372	2089	hypothetical protein
						exon3	77290	78582	1293															orf119	81165	81524	360	722	DNA polymerase
						exon4	79623	79634	12															orf149	82696	82247	450	19	hypothetical protein
						exon5	80514	80949	436															orf108	83042	82716	327	1615	hypothetical protein
						intron1	71606	73053	1448															atp9	84879	84658	222	1830
						intron2	75699	77289	1591															trnG(tcc)	86710	86780	71	61
						intron3	78583	79622	1040															orf284	86842	87696	855	627	DNA polymerase 2
						intron4	79635	80513	879															orf318	88324	89280	957	270	DNA polymerase 2
						orf300	76146	77048	903		GIY-YIG homing endonuclease													trnR(tct)	89623	89551	73	482
						orf226	78603	79283	681		LAGLIDADG homing endonuclease													trnL(tag)	90188	90106	83	178
						trnA(tgc)	81097	81167	71	728														trnW(cca)	90439	90367	73	224
						trnF(gaa)	81896	81967	72	382														atp8	90822	90664	159	771
						trnT(tgt)	82350	82421	72	147														atp6	92361	91594	768	1168
						trnQ(ttg)	82569	82642	74	301														trnE(ttc)	93530	93601	72	399
						trnR(tcg)	83016	82944	73	1276														trnS(gct)	94001	94082	82	179
						nad3	84682	84293	390	-1
						nad2	86433	84682	1752	477
						trnG(tcc)	86981	86911	71	1661
						trnM(cat)	88713	88643	71	88
						trnL(taa)	88886	88802	85	128
						trnN(gtt)	89087	89015	73	307
						trnP(tgg)	89469	89395	75	1394
						orf219	90864	91523	660	122	LAGLIDADG homing endonuclease
						orf407	91646	92869	1224	148	LAGLIDADG homing endonuclease
						orf310	93018	93950	933	1023	hypothetical protein
						trnR(tct)	95046	94974	73	481
						trnL(tag)	95610	95528	83	114
						trnW(cca)	95798	95725	74	208
						atp8	96165	96007	159	504
						atp6	97440	96670	771	1452
						atp9	98893	99114	222	995
						orf250	100110	100862	753	344	hypothetical protein
						orf108	101207	101533	327	99	hypothetical protein
						orf105	101633	101950	318	553	hypothetical protein
						trnE(ttc)	102504	102575	72	123
						trnS(gct)	102699	102780	82	310

## Sheet: Table S3
Table S3 Start and stop codon analyses of 15 core protein-coding genes in 27 Agaricales species
Species	atp6		atp8		atp9		cob		cox1		cox2		cox3		nad1		nad2		nad3		nad4		nad4L		nad5		nad6		rps3
	start	stop	start	stop	start	stop	start	stop	start	stop	start	stop	start	stop	start	stop	start	stop	start	stop	start	stop	start	stop	start	stop	start	stop	start	stop
Tricholoma matsutake SCYJ1	ATG	TAA	ATG	TAA	ATG	TAA	ATG	TAA	GTG	TAA	ATG	TAA	ATG	TAA	ATG	TAA	ATG	TAG	ATG	TAA	ATG	TAA	ATG	TAA	ATG	TAA	ATG	TAA	ATG	TAA
Tricholoma bakamatsutake	ATG	TAA	ATG	TAA	ATG	TAA	ATG	TAA	GTG	TAA	ATG	TAA	ATG	TAA	ATG	TAA	ATG	TAA	ATG	TAA	ATG	TAA	ATG	TAA	ATG	TAA	ATG	TAA	ATG	TAA
Tricholoma terreum	ATG	TAA	ATG	TAA	ATG	TAA	ATG	TAA	ATG	TAA	ATG	TAA	ATG	TAA	ATG	TAG	ATG	TAA	ATG	TAA	ATG	TAA	ATG	TAA	ATG	TAG	ATG	TAG	ATG	TAA
Tricholoma flavovirens	ATG	TAA	ATG	TAA	ATG	TAA	ATG	TAA	GTG	TAA	ATG	TAA	ATG	TAA	ATG	TAA	ATG	TAA	ATG	TAA	ATG	TAA	ATG	TAA	ATG	TAG	ATG	TAA	ATG	TAA
Tricholoma saponaceum	ATG	TAA	ATG	TAA	ATG	TAA	ATG	TAA	ATG	TAA	ATG	TAA	ATG	TAA	ATG	TAA	ATG	TAA	ATG	TAA	ATG	TAA	ATG	TAA	ATG	TAA	ATG	TAG	ATG	TAA
Agaricus bisporus	ATG	TAA	ATG	TAA	ATG	TAA	ATG	TAG	ATG	TAA	ATG	TAG	ATG	TAA	ATG	TAA	ATG	TAA	ATG	TAA	ATG	TAA	ATG	TAA	ATG	TAA	ATG	TAG	ATG	TAA
Coprinopsis cinerea	ATG	TAA	ATG	TAA	ATG	TAA	ATG	TAA	ATG	TAA	ATG	TAA	ATG	TAA	ATG	TAA	ATG	TAA	ATG	TAA	ATG	TAA	ATG	TAA	ATG	TAA	ATG	TAA	ATG	TAG
Laccaria amethystina	ATG	TAA	ATG	TAA	ATG	TAA	ATG	TAA	GTG	TAA	ATG	TAA	ATG	TAA	ATG	TAA	ATG	TAA	ATG	TAA	ATG	TAA	ATG	TAA	ATG	TAA	ATG	TAA	ATG	TAA
Laccaria bicolor	ATG	TAA	ATG	TAA	ATG	TAA	ATG	TAA	GTG	TAA	ATG	TAA	ATG	TAA	TTG	TAA	ATG	TAA	ATG	TAA	ATG	TAA	ATG	TAA	ATG	TAA	ATG	TAA	ATG	TAA
Lyophyllum decastes	ATG	TAA	ATG	TAA	ATG	TAA	ATG	TAA	GTG	TAA	ATG	TAA	ATG	TAA	ATG	TAA	ATG	TAA	ATG	TAA	ATG	TAA	ATG	TAA	ATG	TAA	ATG	TAA	ATG	TAA
Lyophyllum shimeji	ATG	TAA	ATG	TAA	ATG	TAA	ATG	TAA	GTG	TAG	ATG	TAA	ATG	TAA	ATG	TAA	ATG	TAA	ATG	TAA	ATG	TAA	ATG	TAA	ATG	TAA	ATG	TAA	ATG	TAA
Tricholoma matsutake	ATG	TAA	ATG	TAA	ATG	TAA	ATG	TAA	GTG	TAA	ATG	TAA	ATG	TAA	ATG	TAA	ATG	TAG	ATG	TAA	ATG	TAA	ATG	TAA	ATG	TAA	ATG	TAA	ATG	TAA
Armillaria borealis	ATG	TAA	ATG	TAA	ATG	TAG	ATG	TAA	ATG	TAA	ATG	TAA	ATG	TAA	ATG	TAA	ATG	TAA	ATG	TAA	ATG	TAA	ATG	TAA	ATG	TAA	ATG	TAA	ATG	TAA
Armillaria solidipes	ATG	TAA	ATG	TAA	ATG	TAG	ATG	TAA	ATG	TAA	ATG	TAA	ATG	TAA	ATG	TAA	ATG	TAA	ATG	TAA	ATG	TAA	ATG	TAA	ATG	TAA	ATG	TAA	ATG	TAA
Desarmillaria tabescens	ATG	TAA	ATG	TAA	ATG	TAG	ATG	TAA	ATG	TAA	ATG	TAA	ATG	TAA	ATG	TAA	ATG	TAA	ATG	TAA	ATG	TAA	ATG	TAA	ATG	TAA	ATG	TAA	ATG	TAA
Armillaria sinapina	ATG	TAA	ATG	TAA	ATG	TAG	ATG	TAA	ATG	TAA	ATG	TAA	ATG	TAA	ATG	TAA	ATG	TAA	ATG	TAA	ATG	TAA	ATG	TAA	ATG	TAA	ATG	TAA	ATG	TAA
Flammulina velutipes	ATG	TAA	ATG	TAA	ATG	TAA	ATG	TAA	ATG	TAA	ATG	TAA	ATG	TAA	ATG	TAA	ATG	TAA	ATG	TAA	ATG	TAA	ATG	TAA	ATG	TAA	ATG	TAA	ATG	TAA
Lentinula edodes	ATG	TAA	ATG	TAA	ATG	TAA	ATG	TAA	ATG	TAA	ATG	TAG	ATG	TAG	ATG	TAA	ATG	TAA	ATG	TAA	ATG	TAA	ATG	TAA	ATG	TAG	ATG	TAA	ATG	TAA
Moniliophthora perniciosa	ATG	TAG	ATG	TAA	ATG	TAA	ATG	TAA	TTG	TAA	ATG	TAG	ATG	TAG	ATG	TAA	ATG	TAA	ATG	TAA	ATG	TAA	ATG	TAA	ATG	TAA	ATG	TAA	ATG	TAA
Moniliophthora roreri	ATG	TAG	ATG	TAA	ATG	TAA	ATG	TAA	TTG	TAA	ATG	TAG	ATG	TAG	ATG	TAA	ATG	TAA	ATG	TAA	ATG	TAA	ATG	TAA	ATG	TAA	ATG	TAA	ATA	TAA
Schizophyllum commune	ATG	TAA	ATG	TAA	ATG	TAA	ATG	TAA	ATG	TAA	ATG	TAA	ATG	TAA	ATG	TAG	ATG	TAA	ATG	TAA	ATG	TAA	ATG	TAA	ATG	TAA	ATG	TAA	ATG	TAA
Pleurotus citrinopileatus	ATG	TAA	ATG	TAG	ATG	TAA	ATG	TAA	GTG	TAA	ATG	TAG	ATG	TAA	ATG	TAA	ATG	TAA	ATG	TAA	ATG	TAA	ATG	TAA	ATG	TAA	ATG	TAA	ATG	TAA
Pleurotus platypus	ATG	TAA	ATG	TAG	ATG	TAA	ATG	TAA	GTG	TAA	ATG	TAA	ATG	TAG	ATG	TAA	ATG	TAA	ATG	TAA	ATG	TAA	ATG	TAA	ATG	TAA	ATG	TAA	ATG	TAG
Pleurotus ostreatus	ATG	TAA	ATG	TAG	ATG	TAA	ATG	TAA	GTG	TAA	ATG	TAG	ATG	TAG	ATG	TAA	ATG	TAA	ATG	TAA	ATG	TAA	ATG	TAA	ATG	TAA	ATG	TAA	ATG	TAA
Pleurotus eryngii	ATG	TAA	ATG	TAG	ATG	TAA	ATG	TAA	ATG	TAA	ATG	TAA	ATG	TAG	ATG	TAA	ATG	TAA	ATG	TAA	ATG	TAA	ATG	TAA	ATG	TAA	ATG	TAA	ATG	TAG
Hygrophorus russula	ATG	TAA	ATG	TAA	ATG	TAA	ATG	TAA	GTG	TAA	ATG	TAA	ATG	TAA	ATG	TAA	ATG	TAA	ATG	TAA	ATG	TAA	ATG	TAA	ATG	TAA	ATG	TAA	ATG	TAA

## Sheet: Table S4
Table S4 Codon usage analysis of the five Tricholoma mitogenomes
AmAcid	Codon	T. matsutake SCYJ1		T. bakamatsutake		T. terreum		T. flavovirens		T. saponaceum
		Number	Frequency	Number	Frequency	Number	Frequency	Number	Frequency	Number	Frequency
Ala	GCG	23	0.00099593	51	0.00160909	25	0.00101264	11	0.000716752	12	0.000412116
	GCA	107	0.00463324	173	0.00545827	116	0.00469864	91	0.0059295	151	0.0051858
	GCT	187	0.00809734	277	0.00873955	210	0.00850616	162	0.0105558	271	0.00930696
	GCC	50	0.00216506	72	0.00227165	56	0.00226831	47	0.00306249	73	0.00250704
Cys	TGT	285	0.0123409	415	0.0130935	308	0.0124757	183	0.0119242	382	0.013119
	TGC	103	0.00446003	164	0.00517432	109	0.0044151	89	0.00579918	143	0.00491105
Asp	GAT	367	0.0158916	527	0.0166272	439	0.0177819	280	0.0182446	573	0.0196785
	GAC	85	0.00368061	132	0.00416469	96	0.00388853	58	0.00377924	123	0.00422419
Glu	GAG	151	0.00653849	227	0.00716201	199	0.0080606	84	0.00547338	223	0.00765849
	GAA	386	0.0167143	567	0.0178893	467	0.0189161	276	0.017984	569	0.0195412
Phe	TTT	1909	0.0826622	2455	0.077457	1620	0.0656189	1072	0.0698508	1904	0.0653891
	TTC	324	0.0140296	477	0.0150497	402	0.0162832	247	0.0160944	544	0.0186826
Gly	GGG	82	0.00355071	135	0.00425935	111	0.00449611	60	0.00390956	137	0.00470499
	GGA	170	0.00736122	281	0.00886575	206	0.00834413	139	0.00905714	276	0.00947867
	GGT	230	0.0099593	348	0.0109796	245	0.00992385	201	0.013097	278	0.00954736
	GGC	51	0.00220837	85	0.00268181	48	0.00194426	41	0.00267153	66	0.00226664
His	CAT	247	0.0106954	348	0.0109796	299	0.0121111	207	0.013488	347	0.011917
	CAC	83	0.00359401	157	0.00495346	139	0.00563027	61	0.00397472	136	0.00467065
Ile	ATA	1537	0.0665541	1789	0.0564442	1488	0.0602722	909	0.0592298	1768	0.0607185
	ATT	1552	0.0672036	1989	0.0627544	1497	0.0606367	1080	0.0703721	1986	0.0682052
	ATC	325	0.0140729	444	0.0140085	360	0.014582	252	0.0164201	494	0.0169655
Lys	AAG	471	0.0203949	607	0.0191513	512	0.0207388	265	0.0172672	498	0.0171028
	AAA	2128	0.0921451	2747	0.0866698	1835	0.0743276	1074	0.0699811	1876	0.0644275
Leu	TTG	398	0.0172339	531	0.0167534	468	0.0189566	201	0.013097	502	0.0172402
	TTA	1607	0.0695852	2061	0.065026	1739	0.0704391	1026	0.0668535	1991	0.0683769
	CTG	138	0.00597558	173	0.00545827	196	0.00793908	71	0.00462631	160	0.00549488
	CTA	384	0.0166277	589	0.0185834	514	0.0208198	267	0.0173975	560	0.0192321
	CTT	380	0.0164545	522	0.0164695	465	0.0188351	262	0.0170717	526	0.0180644
	CTC	99	0.00428683	164	0.00517432	179	0.00725049	90	0.00586434	218	0.00748678
Met	ATG	305	0.0132069	444	0.0140085	339	0.0137314	198	0.0129015	368	0.0126382
Asn	AAT	1679	0.0727029	2036	0.0642373	1525	0.0617709	1018	0.0663322	1900	0.0652517
	AAC	381	0.0164978	531	0.0167534	408	0.0165262	237	0.0154428	420	0.0144241
Pro	CCG	25	0.00108253	50	0.00157754	33	0.00133668	20	0.00130319	34	0.00116766
	CCA	103	0.00446003	164	0.00517432	157	0.00635936	112	0.00729784	287	0.00985645
	CCT	178	0.00770763	274	0.0086449	216	0.00874919	150	0.0097739	324	0.0111271
	CCC	54	0.00233827	87	0.00274491	87	0.00352398	57	0.00371408	115	0.00394945
Gln	CAG	147	0.00636529	198	0.00624704	202	0.00818211	73	0.00475663	179	0.0061474
	CAA	432	0.0187062	557	0.0175737	461	0.018673	251	0.016355	487	0.016725
Arg	AGG	184	0.00796744	285	0.00899195	236	0.0095593	137	0.00892683	243	0.00834535
	AGA	478	0.020698	737	0.0232529	509	0.0206173	337	0.0219587	634	0.0217735
	CGG	18	0.000779423	58	0.00182994	29	0.00117466	14	0.00091223	36	0.00123635
	CGA	43	0.00186196	78	0.00246096	56	0.00226831	25	0.00162898	39	0.00133938
	CGT	31	0.00134234	64	0.00201925	31	0.00125567	16	0.00104255	34	0.00116766
	CGC	21	0.000909327	27	0.000851869	27	0.00109365	7	0.000456115	15	0.000515145
Ser	AGT	325	0.0140729	541	0.0170689	387	0.0156756	264	0.0172021	441	0.0151453
	AGC	161	0.00697151	225	0.00709891	173	0.00700745	126	0.00821007	201	0.00690295
	TCG	42	0.00181865	74	0.00233475	55	0.0022278	34	0.00221542	44	0.00151109
	TCA	290	0.0125574	420	0.0132513	324	0.0131238	246	0.0160292	467	0.0160382
	TCT	411	0.0177968	542	0.0171005	504	0.0204148	319	0.0207858	646	0.0221856
	TCC	116	0.00502295	202	0.00637324	160	0.00648088	98	0.00638561	211	0.00724638
Thr	ACG	33	0.00142894	81	0.00255561	52	0.00210629	20	0.00130319	44	0.00151109
	ACA	339	0.0146791	441	0.0139139	366	0.014825	276	0.017984	422	0.0144928
	ACT	311	0.0134667	473	0.0149235	355	0.0143795	208	0.0135531	466	0.0160038
	ACC	138	0.00597558	223	0.00703581	187	0.00757453	106	0.00690689	227	0.00779587
Val	GTG	128	0.00554257	167	0.00526897	148	0.00599482	86	0.0056037	169	0.00580397
	GTA	335	0.0145059	462	0.0145764	322	0.0130428	231	0.0150518	368	0.0126382
	GTT	399	0.0172772	515	0.0162486	446	0.0180655	233	0.0151821	434	0.0149049
	GTC	77	0.0033342	128	0.00403849	110	0.00445561	65	0.00423536	149	0.00511711
Trp	TGG	201	0.00870356	324	0.0102224	238	0.00964031	150	0.0097739	246	0.00844838
	TGA	252	0.0109119	474	0.014955	342	0.0138529	239	0.0155731	510	0.0175149
Tyr	TAT	1323	0.0572876	1913	0.0603565	1539	0.062338	1004	0.06542	1840	0.0631912
	TAC	275	0.0119079	393	0.0123994	316	0.0127997	184	0.0119893	331	0.0113675

## Sheet: Table S5
Table S5 Local BLAST analysis of the five Tricholoma mitogenomes against themselves
Species	Identitie (%)	Aligned length (bp)	Mismatched bases (bp)	Gaps (bp)	from	to	from	to	evalue
Tricholoma matsutake SCYJ1	98.844	173	1	1	22820	22991	18894	19066	1.36e-83
Tricholoma matsutake SCYJ1	98.844	173	1	1	18894	19066	22820	22991	1.36e-83
Tricholoma matsutake SCYJ1	95.833	144	5	1	22810	22953	18765	18907	8.39e-61
Tricholoma matsutake SCYJ1	95.833	144	5	1	18765	18907	22810	22953	8.39e-61
Tricholoma matsutake SCYJ1	99.206	126	0	1	18904	19028	18782	18907	3.91e-59
Tricholoma matsutake SCYJ1	99.206	126	0	1	18782	18907	18904	19028	3.91e-59
Tricholoma matsutake SCYJ1	87.356	87	9	2	22822	22907	24794	24879	8.88e-21
Tricholoma matsutake SCYJ1	88.095	84	8	2	18901	18982	24796	24879	8.88e-21
Tricholoma matsutake SCYJ1	89.474	76	7	1	18787	18861	24804	24879	1.15e-19
Tricholoma bakamatsutake	81.899	337	41	11	23735	24070	13449	13766	4.36e-71
Tricholoma bakamatsutake	81.899	337	41	11	13449	13766	23735	24070	4.36e-71
Tricholoma bakamatsutake	83.2	125	18	3	39469	39593	7583	7704	2.16e-24
Tricholoma bakamatsutake	83.2	125	18	3	7583	7704	39469	39593	2.16e-24
Tricholoma bakamatsutake	90	80	8	0	40868	40947	7624	7703	3.62e-22
Tricholoma bakamatsutake	90	80	8	0	7624	7703	40868	40947	3.62e-22
Tricholoma bakamatsutake	90.385	52	4	1	57776	57827	66500	66550	4.75e-11
Tricholoma terreum	98.99	198	2	0	37721	37918	27480	27677	5.55e-98
Tricholoma terreum	98.99	198	2	0	27480	27677	37721	37918	5.55e-98
Tricholoma terreum	76.211	454	101	6	23181	23629	38804	38353	2.71e-61
Tricholoma terreum	99.091	110	1	0	27678	27787	19642	19533	9.89e-51
Tricholoma terreum	99.091	110	1	0	19533	19642	27787	27678	9.89e-51
Tricholoma terreum	100	76	0	0	47259	47334	41671	41746	1.69e-33
Tricholoma terreum	100	76	0	0	41671	41746	47259	47334	1.69e-33
Tricholoma terreum	77.778	207	36	10	16131	16331	16022	16224	7.92e-27
Tricholoma terreum	77.778	207	36	10	16022	16224	16131	16331	7.92e-27
Tricholoma terreum	96.875	64	1	1	37605	37668	17569	17507	6.17e-23
Tricholoma terreum	98.361	61	0	1	17510	17569	37665	37605	6.17e-23
Tricholoma terreum	98.039	51	0	1	10181	10230	10140	10190	2.23e-17
Tricholoma terreum	100	38	0	0	37664	37701	32689	32726	2.25e-12
Tricholoma terreum	100	38	0	0	32689	32726	37664	37701	2.25e-12
Tricholoma terreum	100	28	0	0	5295	5322	35628	35601	8.15e-07
Tricholoma flavovirens	98.326	239	3	1	26578	26815	23740	23978	2.62e-117
Tricholoma flavovirens	98.326	239	3	1	23740	23978	26578	26815	2.62e-117
Tricholoma flavovirens	96.591	88	3	0	18851	18938	11036	10949	1.37e-35
Tricholoma flavovirens	95.604	91	4	0	10949	11039	18938	18848	1.37e-35
Tricholoma flavovirens	100	53	0	0	18937	18989	10841	10789	3.88e-21
Tricholoma flavovirens	100	53	0	0	10789	10841	18989	18937	3.88e-21
Tricholoma flavovirens	96.61	59	1	1	13851	13909	8999	9056	1.4e-20
Tricholoma flavovirens	96.61	59	1	1	8999	9056	13851	13909	1.4e-20
Tricholoma saponaceum	85.25	1139	130	31	76377	77498	29064	30181	0
Tricholoma saponaceum	85.25	1139	130	31	29064	30181	76377	77498	0
Tricholoma saponaceum	81.009	753	123	14	36866	37605	32074	31329	1.15e-165
Tricholoma saponaceum	81.009	753	123	14	31329	32074	37605	36866	1.15e-165
Tricholoma saponaceum	93.191	235	12	3	51219	51450	46185	46418	5.89e-94
Tricholoma saponaceum	93.191	235	12	3	46185	46418	51219	51450	5.89e-94
Tricholoma saponaceum	100	147	0	0	89481	89627	24563	24417	7.84e-73
Tricholoma saponaceum	100	147	0	0	24417	24563	89627	89481	7.84e-73
Tricholoma saponaceum	91.667	168	7	5	90831	90993	67950	68115	6.19e-59
Tricholoma saponaceum	91.667	168	7	5	67950	68115	90831	90993	6.19e-59
Tricholoma saponaceum	95.082	122	4	2	15369	15489	15312	15432	2.26e-48
Tricholoma saponaceum	95.082	122	4	2	15312	15432	15369	15489	2.26e-48
Tricholoma saponaceum	98.765	81	0	1	63107	63187	24254	24333	6.41e-34
Tricholoma saponaceum	98.765	81	0	1	24254	24333	63107	63187	6.41e-34
Tricholoma saponaceum	100	67	0	0	34203	34269	34136	34202	2.32e-28
Tricholoma saponaceum	100	67	0	0	34136	34202	34203	34269	2.32e-28
Tricholoma saponaceum	95.714	70	3	0	31113	31182	24423	24492	5.03e-25
Tricholoma saponaceum	95.714	70	3	0	89552	89621	31182	31113	5.03e-25
Tricholoma saponaceum	95.714	70	3	0	24423	24492	31113	31182	5.03e-25
Tricholoma saponaceum	98.438	64	1	0	55764	55827	35740	35803	5.03e-25
Tricholoma saponaceum	98.438	64	1	0	35740	35803	55764	55827	5.03e-25
Tricholoma saponaceum	95.714	70	3	0	31113	31182	89621	89552	5.03e-25
Tricholoma saponaceum	100	60	0	0	13162	13221	13085	13144	1.81e-24
Tricholoma saponaceum	100	60	0	0	13085	13144	13162	13221	1.81e-24
Tricholoma saponaceum	89.247	93	5	4	84258	84350	84174	84261	1.81e-24
Tricholoma saponaceum	89.247	93	5	4	84174	84261	84258	84350	1.81e-24
Tricholoma saponaceum	93.939	66	4	0	15426	15491	15312	15377	3.92e-21
Tricholoma saponaceum	93.939	66	4	0	15312	15377	15426	15491	3.92e-21
Tricholoma saponaceum	85.393	89	7	6	1572	1654	2681	2769	3.05e-17
Tricholoma saponaceum	94.545	55	2	1	10596	10650	10542	10595	3.94e-16
Tricholoma saponaceum	94.545	55	2	1	10542	10595	10596	10650	3.94e-16

## Sheet: Table S6
Table S6 Tandem repeats detected in the five Tricholoma mitogenomes using the online program Tandem Repeats Finder
Species	Indices	Period Size	Copy Number	Consensus Size	Percent Matches	Percent Indels	Score	A	C	G	T	Entropy (0-2)	Repeat motif
Tricholoma matsutake SCYJ1	7213--7254	9	4.7	9	93	0	75	23	19	23	33	1.97	AGTGACTCT
Tricholoma matsutake SCYJ1	7681--7738	18	3.3	18	78	2	64	56	0	0	43	0.99	TAATTTAAAATTAAAATT
Tricholoma matsutake SCYJ1	7706--7736	12	2.6	12	94	0	53	64	0	0	35	0.94	AAATTAAAATTT
Tricholoma matsutake SCYJ1	8593--8644	15	3.5	15	79	7	61	76	0	0	23	0.78	AAATTAAAAAAATAA
Tricholoma matsutake SCYJ1	8593--8639	14	3.3	14	87	3	58	78	0	0	21	0.75	AAATTATAAAAATA
Tricholoma matsutake SCYJ1	8648--8717	4	17.3	4	82	8	79	70	0	0	30	0.88	TAAA
Tricholoma matsutake SCYJ1	8648--8717	25	2.9	24	79	8	88	70	0	0	30	0.88	TAAATAAATTAATAATTAAATAAA
Tricholoma matsutake SCYJ1	8725--8749	5	5	5	100	0	50	0	20	0	80	0.72	TTCTT
Tricholoma matsutake SCYJ1	8766--8887	4	29.8	4	78	14	97	75	1	2	20	1	AAAT
Tricholoma matsutake SCYJ1	8805--8899	48	1.9	48	83	8	120	77	3	4	14	1.04	AATAAAAAAATAAATAAATAAATAAATAAAAAAACAAAAAAAAGAAAC
Tricholoma matsutake SCYJ1	10395--10448	5	10.8	5	79	0	63	20	16	1	61	1.44	TTACT
Tricholoma matsutake SCYJ1	11563--11592	14	2.2	14	94	5	53	3	0	13	83	0.77	TTTGTTATTTTGTT
Tricholoma matsutake SCYJ1	11664--11720	18	3.4	18	72	18	68	33	5	7	54	1.5	TAAATATCTTTTGGTATT
Tricholoma matsutake SCYJ1	11651--11726	32	2.4	32	97	0	143	34	5	5	55	1.45	AAATATTTATTTCTAAATATCTTTTGGTATTT
Tricholoma matsutake SCYJ1	12000--12029	11	2.8	11	95	5	53	86	13	0	0	0.57	AAAACAAAACA
Tricholoma matsutake SCYJ1	12523--12570	16	2.9	17	76	17	57	4	0	18	77	0.93	ATTTTTGTTTTGTTTTG
Tricholoma matsutake SCYJ1	13910--13958	7	6.4	7	80	13	53	81	12	0	6	0.86	AAAAACA
Tricholoma matsutake SCYJ1	13910--13958	15	3.1	15	82	5	62	81	12	0	6	0.86	AAAAACAAAAAACAA
Tricholoma matsutake SCYJ1	16696--16747	25	2.1	25	82	13	63	30	3	3	61	1.32	TAATTTAATGTTATTATTCTATATT
Tricholoma matsutake SCYJ1	17702--17766	8	7.9	9	78	11	61	20	0	0	80	0.72	TTTTATTTA
Tricholoma matsutake SCYJ1	17704--17769	22	2.9	22	80	17	73	19	0	0	80	0.72	TTTTTTATTATTTATTTTTTTA
Tricholoma matsutake SCYJ1	17668--17769	15	6.4	15	76	13	80	19	0	1	77	0.92	TTTTTTTTATTTTTA
Tricholoma matsutake SCYJ1	17712--17769	24	2.4	25	82	11	75	18	0	0	81	0.7	TTATTTTTTTTATTTATTTTAATTT
Tricholoma matsutake SCYJ1	18233--18282	7	6.9	7	91	8	82	0	0	14	86	0.58	TTTTTTG
Tricholoma matsutake SCYJ1	18519--18546	13	2.2	13	100	0	56	0	0	14	85	0.59	TTTTTGTTTTTGT
Tricholoma matsutake SCYJ1	18703--18777	5	15	5	83	5	98	56	1	1	41	1.16	ATAAT
Tricholoma matsutake SCYJ1	18782--19028	121	2	122	99	0	487	40	9	15	35	1.79	AAATCAAAGCCTATAATTTAATGGTAGAATTATTTCTTGATGAGGAATCTGTAGAAGTTCAAATC
Tricholoma matsutake SCYJ1	19112--19148	19	2	18	89	5	56	51	0	0	48	1	TATATATAAATAATATAT
Tricholoma matsutake SCYJ1	19346--19377	14	2.3	14	94	0	55	0	0	15	84	0.63	TTTTTGTTTTGGTT
Tricholoma matsutake SCYJ1	20253--20346	6	15.2	6	78	8	91	59	7	0	32	1.25	AATTAA
Tricholoma matsutake SCYJ1	20263--20344	13	6.5	12	87	6	101	57	8	0	34	1.29	AAATTACAATTA
Tricholoma matsutake SCYJ1	20270--20341	6	11.1	7	81	15	93	58	9	0	31	1.31	AATTACA
Tricholoma matsutake SCYJ1	20253--20346	13	7.6	12	83	8	91	59	7	0	32	1.25	AATTAAAATTAA
Tricholoma matsutake SCYJ1	21013--21098	6	13.8	6	80	6	73	53	10	1	34	1.43	ATAATC
Tricholoma matsutake SCYJ1	21114--21167	6	8.8	6	81	4	63	74	1	0	24	0.92	AATAAA
Tricholoma matsutake SCYJ1	21077--21167	24	4	23	72	16	73	68	4	0	27	1.09	AAATAAAATTATAATAAAAATAA
Tricholoma matsutake SCYJ1	21116--21170	19	2.9	20	84	10	71	72	1	0	25	0.94	TAAAAATAAAAATAATAAAT
Tricholoma matsutake SCYJ1	23257--23338	27	3.2	26	78	16	80	70	2	1	25	1.06	AAAATAAATATAAAAATCATTAAAAT
Tricholoma matsutake SCYJ1	23303--23337	9	4	9	85	7	54	74	0	0	25	0.82	TAAAATAAA
Tricholoma matsutake SCYJ1	23257--23338	22	3.6	22	73	25	64	70	2	1	25	1.06	AAAATAAATAAAAAATATAAAT
Tricholoma matsutake SCYJ1	24888--24924	14	2.5	15	91	4	58	78	0	0	21	0.75	AATAAAAATAAATAA
Tricholoma matsutake SCYJ1	24876--24927	8	6.5	8	76	8	52	76	1	0	21	0.87	AAATAAAA
Tricholoma matsutake SCYJ1	25040--25106	6	10.8	6	82	17	84	82	16	0	1	0.75	AAAAAC
Tricholoma matsutake SCYJ1	25038--25106	25	2.7	27	89	8	101	81	15	0	2	0.81	TAAAACACAAAAACAAAAACAAAAAAC
Tricholoma matsutake SCYJ1	25121--25184	5	13.2	5	76	12	62	78	1	0	20	0.84	AATAA
Tricholoma matsutake SCYJ1	25121--25184	29	2.2	29	86	5	85	78	1	0	20	0.84	AATAAAATAAATAAAAAAAAAATAAAATA
Tricholoma matsutake SCYJ1	25121--25184	24	2.7	24	82	4	76	78	1	0	20	0.84	AATAAAATAAAATAAAAAAAAAAA
Tricholoma matsutake SCYJ1	25227--25253	3	9	3	100	0	54	66	0	0	33	0.92	AAT
Tricholoma matsutake SCYJ1	25283--25354	37	1.9	38	82	2	92	61	4	1	33	1.24	AAATAAATAAAAAAAAATAAAAAAATTTTATTTAACCT
Tricholoma matsutake SCYJ1	25387--25553	9	19.4	9	68	16	63	72	5	2	19	1.16	TAAATAAAA
Tricholoma matsutake SCYJ1	25514--25553	4	9.8	4	89	5	62	80	0	0	20	0.72	AAAT
Tricholoma matsutake SCYJ1	25513--25573	13	4.7	13	82	13	72	77	0	0	22	0.78	AAAATAAATAAAT
Tricholoma matsutake SCYJ1	25489--25555	8	7.8	8	82	11	62	79	4	0	16	0.9	TAAAAAAA
Tricholoma matsutake SCYJ1	27248--27318	10	7.8	9	75	17	58	73	1	0	25	0.92	AATAAAATA
Tricholoma matsutake SCYJ1	27232--27296	20	3.2	20	74	20	62	72	3	0	24	0.99	AAATAAAATAAATAACAATA
Tricholoma matsutake SCYJ1	27248--27321	27	2.8	26	79	16	89	72	2	0	24	0.97	AATAAAATAAATAAATAACATTATTA
Tricholoma matsutake SCYJ1	27248--27319	28	2.6	29	87	10	98	73	1	0	25	0.91	AATAAAATAAATAAAAATAAAAATTATTA
Tricholoma matsutake SCYJ1	28247--28311	7	9.3	7	78	11	62	32	1	0	66	1.01	TTTTATA
Tricholoma matsutake SCYJ1	28374--28422	17	3.1	16	81	18	50	34	4	2	59	1.28	TTTTTAACTTTAATAA
Tricholoma matsutake SCYJ1	28456--28516	6	10	6	80	16	72	80	19	0	0	0.72	CAAAAA
Tricholoma matsutake SCYJ1	28456--28516	13	5	12	82	13	72	80	19	0	0	0.72	CAAAAACAAAAA
Tricholoma matsutake SCYJ1	28456--28516	19	3.3	18	82	14	72	80	19	0	0	0.72	CAAAAACAAAAACAAAAA
Tricholoma matsutake SCYJ1	29521--29555	7	4.7	7	86	13	52	82	17	0	0	0.66	AAAACAA
Tricholoma matsutake SCYJ1	29526--29571	16	2.8	17	90	3	67	82	10	4	2	0.89	AAAAAACAAAAAACCAG
Tricholoma matsutake SCYJ1	29521--29592	8	8.5	8	74	19	58	79	13	2	4	1	AAAACAAA
Tricholoma matsutake SCYJ1	30044--30085	7	6	7	86	10	59	0	4	9	85	0.72	TTTTTTG
Tricholoma matsutake SCYJ1	30042--30084	21	2	21	91	8	70	0	6	6	86	0.72	TCTTTTTTTCTTTTTGTTTTT
Tricholoma matsutake SCYJ1	30942--30993	12	4.3	12	82	0	68	36	7	5	50	1.55	AATTCTAATTGT
Tricholoma matsutake SCYJ1	30930--30995	6	11	6	77	6	53	36	6	7	50	1.56	AATTGT
Tricholoma matsutake SCYJ1	30930--30995	18	3.7	18	83	4	80	36	6	7	50	1.56	AATTGTAATTGTAATTCT
Tricholoma matsutake SCYJ1	30931--31007	18	4.3	18	83	3	57	33	5	7	53	1.52	ATTGTAATTGTAATTATT
Tricholoma matsutake SCYJ1	31957--32037	3	26.3	3	82	5	99	64	0	1	34	1.02	ATA
Tricholoma matsutake SCYJ1	31957--32045	22	4.1	22	84	4	119	65	0	1	33	1	ATAATAATAATAATAAATAATA
Tricholoma matsutake SCYJ1	32120--32166	9	5.8	8	80	14	51	70	0	0	29	0.88	ATATAAAA
Tricholoma matsutake SCYJ1	34355--34423	6	11.5	6	84	6	86	79	4	1	14	0.95	AAAAAT
Tricholoma matsutake SCYJ1	35843--35868	6	4.3	6	100	0	52	84	0	0	15	0.62	AAAAAT
Tricholoma matsutake SCYJ1	39311--39371	17	3.8	17	72	10	56	21	1	1	75	0.98	TTTTATATTTATTTATT
Tricholoma matsutake SCYJ1	39322--39369	21	2.2	21	85	7	60	20	2	2	75	1.02	TTTAATTTTTATATTTTTCTT
Tricholoma matsutake SCYJ1	39735--39828	6	15.5	6	82	10	111	61	0	0	38	0.96	AATATA
Tricholoma matsutake SCYJ1	39920--39951	4	8	4	92	0	55	75	3	0	21	0.95	TAAA
Tricholoma matsutake SCYJ1	40291--40353	3	21	3	77	6	65	63	0	1	34	1.04	AAT
Tricholoma matsutake SCYJ1	42532--42579	7	6.4	7	80	20	53	81	14	0	4	0.84	AAAAACA
Tricholoma matsutake SCYJ1	42616--42682	27	2.4	28	80	2	82	40	5	5	47	1.52	TATGATTATATAATGTTCAAAATAAATT
Tricholoma matsutake SCYJ1	42922--42951	13	2.3	13	94	0	51	3	0	10	86	0.67	TTTTTGTTTTTTA
Tricholoma matsutake SCYJ1	42922--42966	21	2.2	20	84	4	54	11	2	8	77	1.07	TTTTTGTTTTTTATCTATGA
Tricholoma matsutake SCYJ1	44423--44447	13	1.9	13	100	0	50	20	0	0	80	0.72	TTTTATTTTTTAA
Tricholoma matsutake SCYJ1	44432--44471	19	2.2	19	95	4	73	27	2	0	70	1.01	TTAATTTCTATTTTTTATA
Tricholoma matsutake SCYJ1	45110--45144	17	1.9	18	88	11	54	77	0	0	22	0.78	AATATAATAAATAAAAAA
Tricholoma matsutake SCYJ1	46994--47095	1	102	1	70	0	69	85	12	0	1	0.69	A
Tricholoma matsutake SCYJ1	46994--47095	7	14.7	7	86	9	147	85	12	0	1	0.69	AAAAAAC
Tricholoma matsutake SCYJ1	46994--47095	13	7.4	14	86	8	147	85	12	0	1	0.69	AAAAAACAAAAAAC
Tricholoma matsutake SCYJ1	46996--47095	41	2.4	40	88	9	148	85	13	0	2	0.69	AAAAAAAAAAACAAAAAACAAAAAACAAAAAACAAAAAAC
Tricholoma matsutake SCYJ1	47563--47604	5	8.4	5	100	0	84	40	0	0	59	0.97	ATTAT
Tricholoma matsutake SCYJ1	47624--47659	16	2.2	17	90	5	56	33	2	8	55	1.44	AATAGTTTAGTTTACTT
Tricholoma matsutake SCYJ1	48149--48188	6	6.7	6	94	0	71	32	2	0	65	1.06	TTATAT
Tricholoma matsutake SCYJ1	48149--48206	12	4.8	11	80	17	62	31	1	0	67	1.01	TTATATTATAT
Tricholoma matsutake SCYJ1	48642--48671	4	7.5	4	92	0	51	73	0	0	26	0.84	AAAT
Tricholoma matsutake SCYJ1	50185--50232	18	2.6	18	80	3	51	68	0	0	31	0.9	ATTATAAAAAATAAAAAA
Tricholoma matsutake SCYJ1	51003--51038	18	2	18	88	0	54	58	0	8	33	1.28	AATTGGATTAAAAAAATA
Tricholoma matsutake SCYJ1	51219--51249	15	2	16	93	6	55	61	0	0	38	0.96	ATAATATTAATAAATA
Tricholoma matsutake SCYJ1	51845--51889	6	7.3	6	97	2	81	35	0	0	64	0.94	TATTTA
Tricholoma matsutake SCYJ1	53275--53327	21	2.5	21	75	0	52	54	3	0	41	1.18	TAAAAATTTAATAAATTTAAA
Tricholoma matsutake SCYJ1	57140--57212	37	1.9	38	91	2	121	57	0	2	39	1.13	ATATAAAAATAAATATTTTAAAATTAATATAAGTATAA
Tricholoma matsutake SCYJ1	57793--57841	7	6.7	7	93	6	80	85	14	0	0	0.59	AAAAAAC
Tricholoma matsutake SCYJ1	57930--57964	11	3.1	11	87	4	52	74	0	5	20	1.02	ATTAAAGAAAA
Tricholoma matsutake SCYJ1	57930--57965	12	3.1	12	88	8	56	75	0	5	19	1	ATTAAAGAAAAA
Tricholoma matsutake SCYJ1	58184--58254	6	11.7	6	78	10	65	67	0	1	30	0.99	TAAATA
Tricholoma matsutake SCYJ1	58569--58607	19	2.1	19	85	4	53	17	2	5	74	1.12	TTATTGTATATATTTGTTT
Tricholoma matsutake SCYJ1	58944--58980	8	5	8	87	12	53	32	0	0	67	0.91	TTTTAAAT
Tricholoma matsutake SCYJ1	59175--59219	6	7.3	6	90	5	63	80	15	0	4	0.87	AACAAA
Tricholoma matsutake SCYJ1	59178--59219	19	2.2	19	91	0	66	80	14	0	4	0.86	AAAAACAAAAACAAAAACA
Tricholoma matsutake SCYJ1	59731--59772	7	6.1	7	94	5	77	57	0	0	42	0.99	TTAATAA
Tricholoma matsutake SCYJ1	60177--60260	5	16.8	5	81	14	102	35	0	2	61	1.09	TTATA
Tricholoma matsutake SCYJ1	60598--60654	20	2.9	18	79	20	62	78	15	1	3	0.96	AAAAAACAAAAACAAAAC
Tricholoma matsutake SCYJ1	60599--60655	6	8.8	6	79	11	60	78	15	1	3	0.96	AAAAAC
Tricholoma matsutake SCYJ1	60598--60655	19	2.9	19	82	5	71	79	15	1	3	0.95	AAAAAACAAAAACAAAAAC
Tricholoma matsutake SCYJ1	60658--60751	4	23	4	78	20	54	69	2	0	28	1	TAAA
Tricholoma matsutake SCYJ1	60659--60745	35	2.5	35	89	10	144	68	2	0	28	1.01	AAATAAATAAAATAAATAACAATTAATTAATAATA
Tricholoma matsutake SCYJ1	60658--60755	35	2.6	39	87	11	143	68	2	0	29	1.01	TAAATAAATAAATAAAATAAAAATTAATTAATAATAAAA
Tricholoma matsutake SCYJ1	60773--60852	6	13.7	6	83	10	94	62	0	1	36	1.03	ATATAA
Tricholoma matsutake SCYJ1	60971--61089	7	16.9	7	75	13	84	73	4	0	21	0.99	AAATAAT
Tricholoma matsutake SCYJ1	60970--61071	52	2	52	82	3	125	73	3	0	22	0.99	AAAATAATAAAAATAAATAATAAAAACAATAAACAACAAACAAAAAATAATA
Tricholoma matsutake SCYJ1	61785--61868	27	3.2	26	82	15	95	73	1	0	25	0.9	AATAAAATAATAATAAAAATAATAAA
Tricholoma matsutake SCYJ1	61795--61858	22	3	22	84	8	80	75	0	0	25	0.81	AATAAATAATAAAAATAATAAA
Tricholoma matsutake SCYJ1	62266--62310	22	2	22	82	0	54	48	2	0	48	1.13	TAAAATTTAAAAATTTAAATTA
Tricholoma matsutake SCYJ1	63281--63333	25	2.2	24	86	3	79	79	9	0	11	0.94	AAACAATAAACAAAAACAAAAAAT
Tricholoma matsutake SCYJ1	63275--63333	18	3.2	18	88	7	75	77	10	0	11	0.98	AAACAAAAAATAAAAAAT
Tricholoma matsutake SCYJ1	63631--63707	19	3.9	19	70	21	61	77	1	2	18	0.95	AAAATAAAAAAAAGAAATA
Tricholoma matsutake SCYJ1	63633--63716	30	2.8	30	75	12	84	76	1	2	20	0.97	AATAAAAAAAAAAAATAAAATAAATAATAT
Tricholoma matsutake SCYJ1	63664--63727	24	2.6	24	81	16	62	76	3	1	18	1	ATAATATAAAAAAAAAAATAAAAT
Tricholoma matsutake SCYJ1	66602--66634	7	4.7	7	88	11	50	87	12	0	0	0.53	AAAAAAC
Tricholoma matsutake SCYJ1	67270--67361	5	18.6	5	75	5	80	55	0	5	39	1.23	TAATA
Tricholoma matsutake SCYJ1	67270--67353	20	4.2	20	84	6	107	53	0	5	40	1.25	TAATTTAATATAATAGAATA
Tricholoma matsutake SCYJ1	67809--67844	16	2.3	15	90	4	54	27	0	0	72	0.85	TATTATTTTAATTTT
Tricholoma matsutake SCYJ1	68244--68297	6	8.8	6	87	4	81	62	0	0	37	0.95	TTAAAA
Tricholoma matsutake SCYJ1	68226--68289	19	3.4	19	82	8	69	65	1	0	32	1.02	AAAATTAAAAATACAAATT
Tricholoma matsutake SCYJ1	68226--68298	12	5.9	12	81	10	67	64	1	0	34	1.02	AAAATTTAAATT
Tricholoma matsutake SCYJ1	68475--68513	20	2.1	19	90	9	62	69	7	0	23	1.14	TTTAATAAAAAACAAAAAA
Tricholoma matsutake SCYJ1	68481--68553	21	3.5	20	80	10	69	76	8	1	13	1.07	AAAAACAAAAAATATAAATA
Tricholoma matsutake SCYJ1	69639--69678	21	2	20	90	5	62	70	0	12	17	1.18	AAAGAATAATGAAAAGAAAT
Tricholoma matsutake SCYJ1	70471--70525	21	2.7	21	83	8	60	10	3	7	78	1.08	TTGTTTTTATTTTTATCCTTT
Tricholoma matsutake SCYJ1	70489--70542	17	3.3	17	79	5	67	11	3	3	81	0.95	TTTTTGTTTTTTATTTA
Tricholoma matsutake SCYJ1	71151--71179	10	2.7	11	94	5	51	82	0	6	10	0.83	AAAATAAAGAA
Tricholoma matsutake SCYJ1	71517--71578	29	2.1	29	82	5	72	6	1	12	79	1	TTTTATTTGTGTTTTAATTTGTTTGTTTG
Tricholoma matsutake SCYJ1	71536--71600	20	3.3	20	80	10	71	6	1	10	81	0.93	TTTTTATTTGTTTATTTGTG
Tricholoma matsutake SCYJ1	72439--72486	4	12.3	4	80	12	55	77	2	0	20	0.88	ATAA
Tricholoma matsutake SCYJ1	72439--72487	17	2.8	18	85	11	66	77	2	0	20	0.87	ATAAATAAATAAAAAACA
Tricholoma matsutake SCYJ1	72668--72727	6	10	6	88	0	66	46	0	13	40	1.43	AAGTAT
Tricholoma matsutake SCYJ1	72668--72728	18	3.4	18	88	0	86	45	0	13	40	1.43	AAGTATTAGTATTAGTAT
Tricholoma matsutake SCYJ1	72717--72799	41	2	41	92	0	139	44	4	7	43	1.53	AGTATAAGTATTTATTTAACAAAAAATATCTTAGTTATATA
Tricholoma matsutake SCYJ1	74488--74520	12	2.8	12	95	4	59	78	0	0	21	0.75	TAAAAATAAATA
Tricholoma matsutake SCYJ1	74679--74759	5	16.8	5	78	16	75	81	1	1	16	0.82	AAAAT
Tricholoma matsutake SCYJ1	74677--74758	30	2.9	28	83	15	98	81	1	1	15	0.81	AAAAAATAAAATAAAATAAAATAAATAA
Tricholoma matsutake SCYJ1	74680--74761	19	4.6	18	78	13	80	80	1	1	17	0.84	AAATAAAAATAAAAAAAT
Tricholoma bakamatsutake	12486--12584	6	16.3	6	92	6	164	81	0	1	17	0.74	AAAATA
Tricholoma bakamatsutake	16321--16452	22	6	22	96	0	246	53	17	5	23	1.64	CCAAACTATAAAATAACTATAG
Tricholoma bakamatsutake	18462--18492	15	2.1	15	94	5	55	25	3	6	64	1.33	TTGTTTACTTATAAT
Tricholoma bakamatsutake	18555--18634	9	8.9	9	91	5	135	65	1	1	32	1.09	TATAAAATA
Tricholoma bakamatsutake	18962--19004	9	4.8	9	88	0	68	27	18	20	32	1.96	TAGTGACTC
Tricholoma bakamatsutake	20449--20502	27	2	27	100	0	108	40	14	11	33	1.82	CACTACCAAAATTAGATAGAGATTTTT
Tricholoma bakamatsutake	20621--20665	23	2	23	81	0	54	44	13	4	37	1.64	TTATTACTAAAAAAAAAACTTTC
Tricholoma bakamatsutake	21118--21202	6	14.2	6	94	0	125	61	0	0	38	0.96	AAATTA
Tricholoma bakamatsutake	22059--22087	12	2.3	13	88	11	51	82	0	0	17	0.66	AATAAAAAAAATA
Tricholoma bakamatsutake	22124--22192	4	16.8	4	79	11	50	66	0	0	33	0.92	TAAA
Tricholoma bakamatsutake	22154--22195	17	2.4	17	88	8	57	73	0	0	26	0.83	AAATAAATAAATAATAA
Tricholoma bakamatsutake	22150--22195	24	2	22	91	8	74	73	0	0	26	0.83	AAATAAATAAAATAAATAATAA
Tricholoma bakamatsutake	25191--25284	3	31.3	3	97	0	179	68	0	0	31	0.9	ATA
Tricholoma bakamatsutake	28320--28362	7	6	7	91	2	68	83	13	0	2	0.74	AACAAAA
Tricholoma bakamatsutake	29492--29527	9	4	9	100	0	72	44	0	0	55	0.99	AATTTAATT
Tricholoma bakamatsutake	29484--29526	18	2.4	18	92	0	68	44	0	0	55	0.99	ATTTAATAAATTTAATTA
Tricholoma bakamatsutake	29492--29528	5	8	5	82	17	53	43	0	0	56	0.99	AATTT
Tricholoma bakamatsutake	30778--30828	11	4.4	11	79	18	50	78	7	3	9	1.07	AAATAAAAAAC
Tricholoma bakamatsutake	30778--30814	11	3.3	12	88	11	51	81	10	2	5	0.96	AAATAACAAAAC
Tricholoma bakamatsutake	30785--30822	11	3.4	11	89	10	51	81	7	5	5	0.98	AAAACAAAAAG
Tricholoma bakamatsutake	31130--31173	18	2.4	18	80	0	52	81	9	0	9	0.87	AAAATAAAAACAAAAAAC
Tricholoma bakamatsutake	31247--31304	18	3	18	72	18	53	46	0	6	46	1.29	TATTTAAATAATTAAATT
Tricholoma bakamatsutake	31315--31343	13	2.2	13	100	0	58	79	0	0	20	0.74	AAAATAAATAAAT
Tricholoma bakamatsutake	31740--31887	20	7.4	20	96	0	269	37	5	0	56	1.22	CTATTTAAAATTATATTTAT
Tricholoma bakamatsutake	31750--31879	6	19.7	6	69	17	71	36	4	0	58	1.19	TTATAT
Tricholoma bakamatsutake	32365--32422	17	3.4	17	79	9	73	3	0	17	79	0.87	TTTTTGTTTTTTGTTTG
Tricholoma bakamatsutake	32521--32635	1	115	1	66	0	50	12	1	3	82	0.87	T
Tricholoma bakamatsutake	32524--32605	19	4.3	18	77	11	65	12	2	2	82	0.86	TTTTTATTTTTTTTTCTA
Tricholoma bakamatsutake	32522--32599	27	2.9	26	84	5	84	11	2	2	83	0.85	TTTTATTTTTGTTTTTTTATTTTCTA
Tricholoma bakamatsutake	32520--32635	33	3.6	31	80	13	119	12	1	3	81	0.89	ATTTTTGTTTTTTTTTTTTTATTTTTATTTT
Tricholoma bakamatsutake	32522--32636	28	4.2	26	77	14	92	13	1	3	81	0.89	TTTTTATTTTTTTTTTTTATTTTTTA
Tricholoma bakamatsutake	32521--32636	44	2.8	42	81	13	116	12	1	3	81	0.89	TTTTTTTATTTTTTATTTTGTATTGTTTTTTTATTATTTTTG
Tricholoma bakamatsutake	32561--32622	26	2.4	26	82	12	83	17	0	1	80	0.79	TTTTTTATTTTTTATTTTTATTAATA
Tricholoma bakamatsutake	32852--32877	12	2.2	12	100	0	52	0	0	7	92	0.39	TTTTTTTTGTTT
Tricholoma bakamatsutake	33265--33291	14	1.9	14	100	0	54	88	11	0	0	0.5	AAAAAAACAAAAAC
Tricholoma bakamatsutake	33539--33580	5	8.4	5	84	10	59	57	0	2	40	1.12	ATAAT
Tricholoma bakamatsutake	33806--33843	18	2.1	18	85	9	51	57	5	0	36	1.21	AATATAAATAAAATTCTT
Tricholoma bakamatsutake	33869--33895	3	9	3	100	0	54	66	0	0	33	0.92	ATA
Tricholoma bakamatsutake	34510--34549	16	2.4	16	87	4	53	27	7	0	65	1.2	TATTTTAATCCATATT
Tricholoma bakamatsutake	34726--34911	14	14.2	13	67	17	75	70	4	1	23	1.12	TAATAAAAATAAA
Tricholoma bakamatsutake	34752--34785	7	4.9	7	100	0	68	73	0	0	26	0.83	AATAAAT
Tricholoma bakamatsutake	34789--34865	16	4.7	16	73	6	64	72	7	1	18	1.15	AAAAACAAAAATTAAT
Tricholoma bakamatsutake	34720--34921	72	2.9	69	72	19	175	70	4	0	23	1.12	AACAATTAATAAAAATAATTTAATAAAAAAAATAAATATAAATAATAAACAATAAATAATAAAAA
Tricholoma bakamatsutake	34746--34914	18	9.9	16	70	16	74	73	5	1	20	1.09	AAAAATAAATAAAAAC
Tricholoma bakamatsutake	35038--35070	17	1.9	17	93	0	57	87	9	3	0	0.63	AAAAACAAAAAAAAAAG
Tricholoma bakamatsutake	35037--35071	12	2.9	12	86	0	52	88	8	2	0	0.61	AAAAAAAAAAAC
Tricholoma bakamatsutake	35083--35179	4	24.3	4	71	22	55	72	1	0	26	0.92	ATAA
Tricholoma bakamatsutake	35060--35115	23	2.6	23	81	15	66	67	7	0	25	1.15	CAAATAAATAAAAATAATTTAAT
Tricholoma bakamatsutake	35085--35170	38	2.2	39	85	6	113	72	1	0	26	0.92	AAATAAAAATATTAAATTCAAATAAATAAAATAAATAAA
Tricholoma bakamatsutake	35145--35180	14	2.7	13	87	8	54	77	0	0	22	0.76	TAAATAAAAAAAA
Tricholoma bakamatsutake	35224--35263	3	13	3	84	5	53	72	0	0	27	0.85	AAT
Tricholoma bakamatsutake	35214--35259	18	2.5	19	86	6	60	76	2	0	21	0.9	ATAAAAATAAAAATAATAA
Tricholoma bakamatsutake	35274--35320	6	7.7	6	77	13	51	63	0	0	36	0.94	ATTAAA
Tricholoma bakamatsutake	39605--39664	5	12	5	100	0	120	60	0	0	40	0.97	AATTA
Tricholoma bakamatsutake	41133--41190	6	9.7	6	96	0	107	34	0	13	51	1.42	TTTAAG
Tricholoma bakamatsutake	42773--42873	6	16.8	6	96	0	148	77	1	0	20	0.87	AATAAA
Tricholoma bakamatsutake	45103--45249	7	20.9	7	82	14	178	70	0	0	28	0.97	AAATAAT
Tricholoma bakamatsutake	45181--45233	18	2.8	19	80	8	65	67	1	1	28	1.11	AAATTAAATAAATAAAATT
Tricholoma bakamatsutake	47575--47672	7	13.7	7	69	26	64	41	0	0	58	0.98	TATATAT
Tricholoma bakamatsutake	47572--47665	5	18.8	5	90	3	145	42	0	0	57	0.98	ATATT
Tricholoma bakamatsutake	47803--47886	6	13	6	76	18	80	79	19	0	1	0.79	CAAAAA
Tricholoma bakamatsutake	47806--47884	15	5.2	15	80	18	92	79	18	0	1	0.8	AAACAAAAACAAAAC
Tricholoma bakamatsutake	47803--47873	20	3.6	19	83	12	90	80	18	0	1	0.79	CAAAAACAAAACAAACAAA
Tricholoma bakamatsutake	47804--47874	34	2.1	35	92	7	119	81	16	0	1	0.76	AAAAACAAAAACAAATCAAACAAAACAAAAACAAA
Tricholoma bakamatsutake	47805--47885	5	15.8	5	77	20	71	80	18	0	1	0.78	AAAAC
Tricholoma bakamatsutake	48009--48034	12	2.2	12	100	0	52	46	0	0	53	1	TTAAAAATATTT
Tricholoma bakamatsutake	48182--48334	82	1.9	78	86	9	218	50	8	5	35	1.55	AAAAACAAAAATAAAAATAAATAAAACCAAAGCTATTCTAATTTTCCATATATATTTGTTTTAAA
Tricholoma bakamatsutake	48901--48956	8	6.5	8	78	13	58	78	16	1	3	0.97	AAAAAACA
Tricholoma bakamatsutake	49414--49438	13	1.9	13	100	0	50	0	4	8	88	0.64	TTTTTGTTTTTTC
Tricholoma bakamatsutake	50296--50359	6	10.7	6	77	0	56	34	7	6	51	1.56	AATTCT
Tricholoma bakamatsutake	50284--50361	18	4.3	18	83	3	95	34	6	7	51	1.56	AATTGTAATTGTAATTCT
Tricholoma bakamatsutake	50296--50347	12	4.3	12	82	0	68	36	7	5	50	1.55	AATTCTAATTGT
Tricholoma bakamatsutake	50327--50365	12	3.3	12	92	0	60	25	5	10	58	1.51	ATTGTAATTGTT
Tricholoma bakamatsutake	50284--50371	18	4.9	18	83	2	79	32	5	6	54	1.5	AATTGTAATTGTTATTCT
Tricholoma bakamatsutake	50863--50894	15	2.1	15	94	0	55	59	0	3	37	1.13	AATAATAATAATTAT
Tricholoma bakamatsutake	50940--50991	7	7	7	80	20	61	55	0	1	42	1.1	TATAATA
Tricholoma bakamatsutake	50941--51031	24	3.9	25	77	14	90	64	0	1	34	1.01	ATAATATATAAATATATAATATATA
Tricholoma bakamatsutake	50940--51044	14	8.4	12	78	16	72	62	0	0	36	1.02	TATAATATATAA
Tricholoma bakamatsutake	50981--51027	13	3.5	13	85	2	58	74	0	0	25	0.82	AATATAAAAAAAA
Tricholoma bakamatsutake	53077--53123	5	9.4	5	92	0	76	59	0	0	40	0.97	ATATA
Tricholoma bakamatsutake	53213--53274	19	3.3	19	81	4	72	62	1	1	33	1.14	AAATTAAAATATAAAATTT
Tricholoma bakamatsutake	53316--53368	12	4.2	13	82	4	56	81	3	1	13	0.92	AAAAAATAAAAAT
Tricholoma bakamatsutake	53316--53368	25	2.1	25	82	6	63	81	3	1	13	0.92	AAAAAACAAAATAAAAAATAAAAAT
Tricholoma bakamatsutake	57094--57140	13	3.8	13	94	5	80	82	17	0	0	0.66	AAAACAAAAACCA
Tricholoma bakamatsutake	57094--57140	6	7.7	6	88	11	69	82	17	0	0	0.66	AAAACA
Tricholoma bakamatsutake	57146--57182	7	5.3	7	100	0	74	43	0	0	56	0.99	TATTTAA
Tricholoma bakamatsutake	57634--57780	7	20.7	7	72	22	87	80	14	1	4	0.93	AAAAACA
Tricholoma bakamatsutake	57634--57782	11	12.9	11	72	14	104	80	14	1	4	0.92	AAAAAAAAAAC
Tricholoma bakamatsutake	57648--57780	5	26.8	5	73	17	75	79	14	1	4	0.95	AAAAC
Tricholoma bakamatsutake	57635--57781	16	9.6	15	71	17	90	80	14	1	4	0.93	AAAAAAAAACAAAAC
Tricholoma bakamatsutake	57634--57782	66	2.4	64	81	15	170	80	14	1	4	0.92	AAAAAACAAAACAAAAAACAAAACAACAAAATAAATAAAAAACAAAAAACAAAACAAATCAAAC
Tricholoma bakamatsutake	57634--57720	42	2	42	85	10	115	81	16	1	1	0.81	AAAACAAAAAACCAAAAAACAAAACAAAAACAAAACAAAAAC
Tricholoma bakamatsutake	57634--57771	61	2.3	59	80	12	147	79	14	1	4	0.95	AAAACAAAAAACAAAAAACAAAACAACAAAATAAATTAAAAAACAAAAAACAAACAAAC
Tricholoma bakamatsutake	60157--60342	7	25.7	7	81	8	178	20	2	0	76	0.92	ATTTTTT
Tricholoma bakamatsutake	60163--60279	4	31.8	4	68	24	71	17	0	0	80	0.82	TATT
Tricholoma bakamatsutake	60286--60335	9	5.3	10	88	9	54	26	0	0	74	0.83	TTTTTATAAT
Tricholoma bakamatsutake	60158--60335	18	9.6	18	73	17	98	20	1	0	77	0.89	TTTTATATTTTATATATT
Tricholoma bakamatsutake	60410--60459	15	3.3	15	78	10	57	28	2	0	70	0.99	ATTTTTTTAATTTAT
Tricholoma bakamatsutake	60691--60757	25	2.7	24	84	6	71	58	0	0	41	0.98	TATAATTAAAAATATAAATATAAA
Tricholoma bakamatsutake	60690--60759	6	11.3	6	82	11	79	55	0	0	44	0.99	TTATAA
Tricholoma bakamatsutake	60691--60781	12	7.7	12	79	10	89	53	0	2	43	1.12	TATAATTATAAA
Tricholoma bakamatsutake	61189--61236	3	16	3	77	0	51	60	0	2	37	1.09	AAT
Tricholoma bakamatsutake	62301--62333	15	2.1	16	88	5	50	72	3	0	24	0.98	AAATAATAATAAAAAT
Tricholoma bakamatsutake	63360--63404	6	7.5	6	85	9	56	28	0	2	68	1.01	ATATTT
Tricholoma bakamatsutake	63498--63571	22	3.4	22	78	10	73	78	6	0	14	0.95	ATAAAAAACAAAAATAAATAAA
Tricholoma bakamatsutake	63592--63656	27	2.4	27	78	0	85	35	4	6	53	1.46	TATGATTATATAATGTTCAAATAACTT
Tricholoma bakamatsutake	64683--64720	7	5.4	7	100	0	76	26	0	0	73	0.83	TTTTTAA
Tricholoma bakamatsutake	64673--64719	21	2.2	21	84	0	58	29	2	0	68	1.02	TAATTAATAATTTTTAATTTT
Tricholoma bakamatsutake	65543--65583	15	2.9	14	85	14	57	82	7	2	7	0.91	TAAAACAAAAAAAA
Tricholoma bakamatsutake	65746--65877	54	2.5	53	81	7	135	49	6	8	36	1.58	TATTTATAACAAATTATAAATGAAACAGATAATAATCAATCATATAATGAATT
Tricholoma bakamatsutake	66102--66138	12	3.2	12	92	3	58	81	0	0	18	0.7	ATAAATAAAAAA
Tricholoma bakamatsutake	66099--66137	16	2.4	16	91	4	60	82	0	0	17	0.68	AATAAAAAAAAAAATA
Tricholoma bakamatsutake	66276--66325	25	2	25	84	4	64	42	0	2	56	1.11	ATTTTAATTTTTATAAATAGATATA
Tricholoma bakamatsutake	67823--67871	19	2.7	18	78	6	55	59	2	2	36	1.21	ATATTTAAAATAATATAA
Tricholoma bakamatsutake	68029--68060	11	2.9	11	95	0	55	84	12	0	3	0.74	AAAACAAAAAC
Tricholoma bakamatsutake	68535--68586	15	3.6	14	74	7	50	34	0	5	59	1.21	TTTATTTTTAATAG
Tricholoma bakamatsutake	69047--69112	6	11.2	6	78	15	75	28	1	0	69	0.97	TTATAT
Tricholoma bakamatsutake	69048--69100	25	2.1	25	86	6	72	28	1	0	69	0.99	TATATTTATATTTATTATTATATTT
Tricholoma bakamatsutake	69050--69103	13	4.2	13	77	17	51	27	1	0	70	0.98	TATTTATATTTAT
Tricholoma bakamatsutake	70619--70679	19	3.2	18	79	9	68	63	0	0	36	0.94	AAATTATAAATATTAAAA
Tricholoma bakamatsutake	70623--70682	18	3.2	18	80	4	66	63	0	0	36	0.95	TATAAATATTTAAAAAAA
Tricholoma bakamatsutake	71389--71420	14	2.3	14	94	0	55	25	0	0	75	0.81	ATTTTTAATATTTT
Tricholoma bakamatsutake	73108--73141	15	2.2	16	94	5	61	61	0	0	38	0.96	ATAATAATATTAATAA
Tricholoma bakamatsutake	73736--73814	6	12.8	6	88	9	115	31	0	0	68	0.9	TTTATA
Tricholoma bakamatsutake	73728--73815	26	3.2	27	78	18	101	29	0	0	70	0.88	TTATTTTTTTTAATTTATATTTTATAT
Tricholoma bakamatsutake	73741--73814	32	2.4	31	93	4	130	31	0	0	68	0.89	TTTATATTTATATTTATATTTATATTTATAT
Tricholoma bakamatsutake	81022--81046	13	1.9	13	100	0	50	0	0	12	88	0.53	TTTTTTGTTTTTG
Tricholoma bakamatsutake	81512--81562	14	3.3	15	76	13	59	82	13	3	0	0.81	AAAAAAAACAAAAAC
Tricholoma bakamatsutake	81597--81631	17	2.1	17	88	0	52	62	0	2	34	1.1	TAATATAAAAATAAATA
Tricholoma bakamatsutake	81966--82009	6	6.6	7	89	10	58	84	15	0	0	0.63	CAAAAAA
Tricholoma bakamatsutake	81968--82003	6	5.8	6	93	6	63	86	13	0	0	0.58	AAAAAC
Tricholoma bakamatsutake	82287--82344	6	9.7	6	80	12	66	79	18	0	1	0.82	AAAAAC
Tricholoma bakamatsutake	82287--82344	11	4.9	12	81	12	57	79	18	0	1	0.82	AAAAACCAAAAC
Tricholoma bakamatsutake	82287--82347	17	3.4	18	76	10	63	78	18	0	3	0.88	AAAAATAAAAACAAAAAC
Tricholoma bakamatsutake	82435--82466	16	2	16	93	0	55	78	0	6	15	0.95	TAAAGTAAAAAAAAAA
Tricholoma bakamatsutake	82676--82743	6	11.3	6	89	4	93	66	0	0	33	0.92	AATATA
Tricholoma bakamatsutake	82748--82830	1	83	1	97	0	157	0	0	1	98	0.09	T
Tricholoma bakamatsutake	83329--83485	6	26.7	6	85	6	178	31	0	0	67	0.95	TTTATA
Tricholoma bakamatsutake	83825--83858	14	2.5	14	95	4	61	79	14	5	0	0.91	AACAAAACAAAGAA
Tricholoma bakamatsutake	86481--86545	10	6.7	10	78	3	53	16	1	0	81	0.77	TTTATTTTTT
Tricholoma bakamatsutake	86485--86607	22	5.5	22	73	20	94	21	0	0	76	0.89	ATTTATTTTTATTTATATTTTT
Tricholoma bakamatsutake	86489--86611	6	20.3	6	70	15	60	21	0	0	76	0.89	TTTTTA
Tricholoma bakamatsutake	86521--86605	37	2.3	38	80	13	106	25	0	1	72	0.91	TATTTTTATTTAATTTTTATTTAGTTTTTATTTATAAT
Tricholoma bakamatsutake	86572--86618	22	2.1	23	84	4	60	23	0	2	74	0.93	TTTTATTTAGTTTTTATTAATAA
Tricholoma bakamatsutake	86697--86731	12	2.9	12	100	0	70	51	0	0	48	1	AATATTAATATT
Tricholoma bakamatsutake	86697--86731	18	1.9	18	100	0	70	51	0	0	48	1	AATATTAATATTAATATT
Tricholoma bakamatsutake	86702--86754	18	3	18	84	13	58	47	0	1	50	1.12	TAATATTAATATAATTTA
Tricholoma bakamatsutake	86984--87055	35	2	36	84	7	94	18	0	2	79	0.86	TTTTATTTTTTTGTTTTTTTATTAATTTAATTATAT
Tricholoma bakamatsutake	88539--88594	13	4.3	14	72	20	50	42	0	1	55	1.1	AATTAATTATATTA
Tricholoma bakamatsutake	89279--89347	12	5.7	12	87	3	102	26	0	0	73	0.83	ATTTATTTTATT
Tricholoma bakamatsutake	89274--89349	17	4.4	17	80	16	93	28	0	0	71	0.87	ATTTAATTTATTTTATT
Tricholoma bakamatsutake	89279--89347	25	2.8	25	93	4	115	26	0	0	73	0.83	ATTTAATTTATTTATTTATTTTATT
Tricholoma bakamatsutake	92857--92905	4	12.3	4	82	0	62	67	0	2	30	1.02	AATA
Tricholoma bakamatsutake	92858--92912	20	2.7	20	89	10	85	63	0	3	32	1.12	ATAAATAATTAAATAAATAG
Tricholoma bakamatsutake	92901--92953	24	2.2	25	83	10	65	52	1	1	43	1.23	AATAATATAAATTAAATAATTATTT
Tricholoma bakamatsutake	93967--94005	3	13	3	88	0	60	61	0	0	38	0.96	AAT
Tricholoma bakamatsutake	93967--94005	12	3.3	12	96	0	69	61	0	0	38	0.96	AATAATAATATT
Tricholoma bakamatsutake	94532--94561	11	2.8	11	95	5	53	56	0	33	10	1.32	GATAGAAAAGG
Tricholoma bakamatsutake	94631--94676	22	2.2	22	84	7	60	63	0	8	28	1.24	AAAAGGATAAATAAATATATAT
Tricholoma bakamatsutake	95436--95474	19	2.1	19	85	0	51	17	0	0	82	0.68	TTTATATATATTTATTTTT
Tricholoma bakamatsutake	95800--95871	13	5.5	13	71	14	58	23	1	0	75	0.89	TTATTTTTTTTAA
Tricholoma bakamatsutake	95816--95863	20	2.4	20	82	0	60	20	0	0	79	0.74	TTTTTTTTTTATTAAAATTA
Tricholoma bakamatsutake	95797--95881	17	4.9	16	76	18	57	23	1	0	75	0.87	TTTTTATTTTTTTTAA
Tricholoma bakamatsutake	95935--95971	18	2.2	16	90	9	56	10	0	0	89	0.49	TTTTATTTTTTTTTTT
Tricholoma bakamatsutake	95935--95970	14	2.6	14	86	0	54	11	0	0	88	0.5	TTTTTTTTATTTTT
Tricholoma bakamatsutake	97130--97158	11	2.7	11	94	5	51	86	0	3	10	0.69	AAAATAAAGAA
Tricholoma bakamatsutake	97531--97628	4	24.8	4	89	2	144	24	0	0	75	0.8	TTTA
Tricholoma bakamatsutake	98741--98812	6	12	6	89	0	108	36	1	15	47	1.54	AGTATT
Tricholoma bakamatsutake	99437--99465	15	1.9	15	100	0	58	82	0	0	17	0.66	TAAAAAAATAAAAAT
Tricholoma bakamatsutake	99437--99474	8	4.9	8	83	6	51	84	2	0	13	0.73	TAAAAAAA
Tricholoma bakamatsutake	99438--99481	15	3	14	86	6	52	86	4	0	9	0.7	AAAAAAATAAAAAA
Tricholoma bakamatsutake	99989--100036	16	3	16	81	6	53	62	0	0	37	0.95	ATATAAAAAATTAATT
Tricholoma bakamatsutake	100022--100075	25	2.2	24	83	9	65	59	3	3	33	1.33	ATAAATAATATAATCTAATAAGAA
Tricholoma bakamatsutake	100946--101013	13	5.3	12	79	11	73	75	0	1	23	0.89	AAAATAAATAAT
Tricholoma bakamatsutake	100948--101039	19	4.8	20	72	20	72	73	1	3	21	1.03	AATAAAATAATAAAATAAAT
Tricholoma bakamatsutake	101417--101452	6	6	6	86	0	54	63	2	19	13	1.41	GATAAA
Tricholoma bakamatsutake	101457--101543	3	28.7	3	78	2	93	60	3	4	31	1.33	ATA
Tricholoma bakamatsutake	101947--101981	9	3.9	9	100	0	70	45	8	0	45	1.34	TTAATATAC
Tricholoma bakamatsutake	102179--102272	5	18.8	5	78	16	65	82	13	0	3	0.78	AAAAC
Tricholoma bakamatsutake	102179--102280	6	16.7	6	82	16	104	83	12	0	2	0.81	AAAACA
Tricholoma bakamatsutake	102179--102281	1	103	1	68	0	53	83	12	0	2	0.81	A
Tricholoma bakamatsutake	102179--102280	13	8.3	12	80	16	104	83	12	0	2	0.81	AAAACAAAAACA
Tricholoma bakamatsutake	102179--102267	7	13.3	7	79	13	91	83	14	0	2	0.75	AAAACAA
Tricholoma bakamatsutake	102590--102637	19	2.5	19	89	0	78	87	10	0	2	0.62	AAAAAAACAAAAACAAAAA
Tricholoma bakamatsutake	102591--102645	13	4.5	12	76	17	51	85	10	1	1	0.75	AAAAAAAACAAC
Tricholoma bakamatsutake	102619--102693	31	2.6	29	80	14	82	76	6	1	16	1.07	AAATAAATAATAAAAACAACGAAAAAATT
Tricholoma bakamatsutake	102892--102971	16	5.1	15	75	13	63	80	2	2	15	0.93	AAATAAAAAAAATAA
Tricholoma bakamatsutake	102884--102942	27	2.3	26	80	11	68	79	0	1	18	0.81	AAAAAAATAAGATAAAATAAATAAAA
Tricholoma terreum	6316--6346	15	2.1	15	93	0	53	45	0	0	54	0.99	ATATATTATAATTTA
Tricholoma terreum	6613--6648	6	6	6	90	0	54	61	0	16	22	1.35	GATAAA
Tricholoma terreum	6613--6648	18	2	18	100	0	72	61	0	16	22	1.35	GATAAAGATAAAGTTAAA
Tricholoma terreum	8505--8553	22	2.2	22	88	0	71	36	16	12	34	1.86	TTGATCGTAAAATAACACTCCA
Tricholoma terreum	10140--10230	41	2.2	41	98	1	175	18	13	15	52	1.74	TTTTGTGTTATCACAATATCTCTCTTTTTTATCAGAGGTTG
Tricholoma terreum	10436--10460	7	3.6	7	100	0	50	0	0	12	88	0.53	TTTTTGT
Tricholoma terreum	13335--13376	3	14	3	94	0	75	64	0	0	35	0.94	ATA
Tricholoma terreum	13738--13792	12	4.6	12	93	0	92	67	0	9	23	1.19	ATAGAAATATAA
Tricholoma terreum	13738--13798	18	3.4	18	88	0	86	67	0	11	21	1.22	ATAGAAATAGAAATATAA
Tricholoma terreum	13738--13798	6	10.2	6	90	0	77	67	0	11	21	1.22	ATAGAA
Tricholoma terreum	15465--15510	22	2.3	19	85	11	56	56	0	2	41	1.11	ATAAAAATATTTTTAAAAT
Tricholoma terreum	15969--16009	6	7.2	6	89	10	68	0	29	0	70	0.87	TTTCTC
Tricholoma terreum	15973--16005	11	3	11	100	0	66	0	27	0	72	0.85	TCTTTCTCTTT
Tricholoma terreum	15969--16009	17	2.4	17	92	8	66	0	29	0	70	0.87	TTTCTCTTTTCTTTCTC
Tricholoma terreum	16022--16182	54	2.9	55	77	9	202	39	8	6	45	1.59	ACTATCTATAACATTATAGAAATATACATTTAATTTGTTTTAAATGTATAATTTA
Tricholoma terreum	16258--16345	45	1.9	46	84	6	117	42	5	3	48	1.43	ATTTTATAGATACATATCTTTATTTTAAAGATATAACTAATTAAAA
Tricholoma terreum	16715--16762	22	2.1	24	84	7	64	47	4	0	47	1.21	TAACAATATTTATTTTAATAAAAA
Tricholoma terreum	17931--17973	20	2.1	19	83	12	50	53	18	2	25	1.56	AACAAAACAATTAAATTTC
Tricholoma terreum	21424--21448	12	2.1	12	100	0	50	40	8	8	44	1.63	TTAATAAAGCTT
Tricholoma terreum	22044--22097	28	1.9	27	82	14	65	35	1	11	51	1.48	GAATAGTATTTTTATTGAATAATTTAA
Tricholoma terreum	25912--25951	18	2.2	19	86	4	55	70	2	5	22	1.19	AATAGTAAAAAAAATAACA
Tricholoma terreum	27797--27859	4	15.8	4	100	0	126	76	23	0	0	0.79	AAAC
Tricholoma terreum	28890--28935	15	3.1	15	84	3	67	41	0	2	56	1.11	TTTATTATATTATAA
Tricholoma terreum	31745--31795	25	2	25	82	14	61	47	3	0	49	1.2	TTTTAAATTATATAACAATAAAATT
Tricholoma terreum	33774--33812	13	2.9	13	85	14	53	38	0	0	61	0.96	TTTTATATATATA
Tricholoma terreum	33782--33818	11	3.5	11	88	3	58	37	0	0	62	0.96	TTATATATATT
Tricholoma terreum	34221--34269	15	3.6	15	74	25	63	38	0	4	57	1.18	TATTAAATTGTTTTA
Tricholoma terreum	34233--34309	10	8.2	10	83	13	110	45	0	1	53	1.08	TTATATTAAA
Tricholoma terreum	34206--34299	25	3.9	25	86	13	128	42	0	2	55	1.12	TTTATATTAAATTATATTAAATTGT
Tricholoma terreum	35494--35601	34	3.2	34	82	8	139	39	0	25	35	1.56	ATATTAAATATAAAATTAGTTGAATAGGGGGTTG
Tricholoma terreum	37216--37251	15	2.4	15	100	0	72	36	30	27	5	1.8	ACCCAAATACGGGGG
Tricholoma terreum	39503--39549	15	3.1	16	76	14	55	51	2	2	44	1.25	TATAATTATAATATAA
Tricholoma terreum	39854--39905	21	2.5	21	96	0	95	44	13	23	19	1.86	GATAGTAGCAGCGATTCAAAA
Tricholoma terreum	40220--40258	22	1.9	20	85	15	53	23	10	2	64	1.37	TATATTTCTTTTTCTATAAT
Tricholoma terreum	41483--41549	7	9.9	7	82	12	68	32	1	0	65	1.02	TTATATA
Tricholoma terreum	41479--41545	14	4.8	14	90	0	107	31	1	0	67	1	TATTTTATATTTTA
Tricholoma terreum	41479--41545	21	3.2	21	95	4	118	31	1	0	67	1	TATTTTATATATTATATTTTA
Tricholoma terreum	42069--42098	8	3.8	8	100	0	60	0	0	20	80	0.72	TTTTTTGG
Tricholoma terreum	44660--44699	6	6.5	6	94	5	71	0	0	15	85	0.61	TTTGTT
Tricholoma terreum	44660--44699	13	3.2	13	92	7	73	0	0	15	85	0.61	TTTGTTTTTGTTT
Tricholoma terreum	47572--47692	6	19.5	6	82	13	147	79	2	1	16	0.92	AAAATA
Tricholoma terreum	55522--55555	10	3.4	10	87	0	50	38	2	0	58	1.13	TTTAATTAAT
Tricholoma terreum	58656--58683	11	2.5	11	100	0	56	82	7	0	10	0.85	AAATAAACAAA
Tricholoma terreum	59948--60042	6	15.8	6	93	0	163	49	14	0	35	1.44	TAATAC
Tricholoma terreum	63177--63207	4	7.8	4	100	0	62	74	0	0	25	0.82	TAAA
Tricholoma terreum	64145--64171	13	2.1	13	100	0	54	70	7	0	22	1.12	ACTAAAATTAAAA
Tricholoma terreum	67028--67054	9	3	9	100	0	54	33	11	0	55	1.35	ATTTATTAC
Tricholoma terreum	74657--74697	18	2.3	18	84	12	50	68	0	7	24	1.15	ATTAATTAAAGAAAAGAA
Tricholoma terreum	75514--75556	15	2.9	15	82	3	52	53	2	0	44	1.13	ATAATTAATATAATT
Tricholoma terreum	76171--76209	20	1.9	21	84	5	53	58	5	5	30	1.41	AAAATGCTAGATTATAAAAAT
Tricholoma terreum	76443--76472	10	3	10	95	0	51	40	13	26	20	1.89	CAAGGTATAG
Tricholoma terreum	77291--77367	10	7.7	10	80	16	97	66	0	7	25	1.19	AATAAATAGA
Tricholoma terreum	77286--77367	20	4.1	20	98	0	155	64	0	8	26	1.22	ATGATAATAAATAGAAATAA
Tricholoma terreum	77889--77930	16	2.6	17	82	14	54	64	4	0	30	1.14	TAATAAAATTATAAAAC
Tricholoma terreum	78604--78747	6	24.2	6	90	0	209	28	15	0	55	1.41	ATCATT
Tricholoma terreum	78604--78741	18	7.7	18	95	0	231	27	16	0	55	1.41	ATCATTATCATTTTCATT
Tricholoma terreum	79853--79891	19	2.1	19	100	0	78	74	15	0	10	1.07	ATTAAAAACAACACAAAAA
Tricholoma terreum	79855--79899	19	2.3	19	92	3	72	77	13	0	8	0.98	TAAAAACAACACAAAAAAA
Tricholoma terreum	80209--80256	19	2.6	18	87	9	69	70	4	0	25	1.04	ATTAAATTAAAAACAAAA
Tricholoma terreum	80373--80397	13	1.9	13	100	0	50	80	16	0	4	0.87	AAAACAAACAAAT
Tricholoma terreum	80369--80402	17	1.9	18	94	5	61	76	17	0	5	0.98	AAACAAAACAAACAAATA
Tricholoma terreum	80510--80595	12	7.8	10	73	24	59	77	0	1	20	0.83	AAAAAATATA
Tricholoma terreum	80510--80593	11	7.5	11	75	16	66	78	0	1	20	0.82	AAAAAATATAA
Tricholoma terreum	80540--80595	4	13.8	4	78	14	53	78	0	0	21	0.75	ATAA
Tricholoma terreum	80511--80583	37	2	37	81	5	85	76	0	1	21	0.86	AAAAATAATAAAAAAATAAAAAAAGAAATAAAAATAT
Tricholoma terreum	80513--80595	29	3	28	84	11	100	77	0	1	21	0.84	AAATATAAAAAAATAAATAAAAAAATAT
Tricholoma terreum	80510--80595	13	6.7	12	73	22	68	77	0	1	20	0.83	AAAAAATAAATA
Tricholoma flavovirens	3124--3162	20	2	19	85	5	51	56	0	7	35	1.28	AGAAGATAAAATTATTATA
Tricholoma flavovirens	4968--5003	8	4.5	8	100	0	72	38	0	0	61	0.96	AATTTATT
Tricholoma flavovirens	5494--5525	16	2	16	93	0	55	53	6	0	40	1.26	CTAATAAATAAATTAT
Tricholoma flavovirens	8519--8555	18	2.2	18	86	13	53	35	2	2	59	1.26	TTATTAATAAGTTCTTTA
Tricholoma flavovirens	9670--9703	15	2.3	15	89	0	50	50	0	0	50	1	TATTAAATAAAATTA
Tricholoma flavovirens	12228--12261	10	3.3	10	91	4	50	82	14	0	2	0.79	AAAACAAACA
Tricholoma flavovirens	12292--12351	5	12.8	5	80	19	76	85	13	0	1	0.69	AAAAC
Tricholoma flavovirens	12288--12326	15	2.5	16	87	8	62	82	12	0	5	0.83	ATAAAAAACAAAACAA
Tricholoma flavovirens	12290--12351	13	4.4	14	84	11	83	85	12	0	1	0.67	AAAAAACAAAACAA
Tricholoma flavovirens	12292--12351	9	6.4	9	90	5	93	85	13	0	1	0.69	AAAAAAAAC
Tricholoma flavovirens	14615--14652	15	2.5	16	83	12	53	78	10	2	7	1.04	AAAAACTAAAAAATCA
Tricholoma flavovirens	21614--21664	7	7.4	7	79	18	54	0	1	11	86	0.66	TTTTGTT
Tricholoma flavovirens	21614--21664	12	4.5	11	87	4	66	0	1	11	86	0.66	TTTTTTTTTTG
Tricholoma flavovirens	21615--21656	16	2.5	17	84	7	59	0	2	11	85	0.68	TTTTGTTTTCTTTTTTG
Tricholoma flavovirens	24172--24204	18	1.9	17	88	11	50	48	0	9	42	1.35	ATATAATAGTAGATTAT
Tricholoma flavovirens	26448--26483	8	4.5	8	100	0	72	88	11	0	0	0.5	AAAAAAAC
Tricholoma flavovirens	26959--27039	20	3.9	21	70	20	64	65	0	3	30	1.1	TTAATAAATAAAAATTAAATA
Tricholoma flavovirens	34137--34171	11	3.2	11	87	0	52	62	0	0	37	0.95	ATTAATAATAA
Tricholoma flavovirens	35776--35819	21	2.1	21	82	0	52	50	2	2	45	1.27	AATAATAAATTATTAATTAAT
Tricholoma flavovirens	38029--38090	26	2.5	23	73	14	61	51	6	3	38	1.44	AAATAAATTAATGATTTTTAATA
Tricholoma flavovirens	38041--38089	26	2	24	84	8	62	48	8	4	38	1.52	GATTTTTAATAAAATAAACCTAAA
Tricholoma flavovirens	38170--38215	22	2.1	22	83	0	56	54	4	0	41	1.2	AATAAATTACAAATATAAATTT
Tricholoma flavovirens	45343--45382	7	5.7	7	88	11	64	87	12	0	0	0.54	AAAAACA
Tricholoma flavovirens	46181--46221	9	4.8	9	88	11	68	68	0	0	31	0.9	TAAATAATA
Tricholoma flavovirens	46181--46221	16	2.4	16	92	8	64	68	0	0	31	0.9	TAAATAATATAAAATA
Tricholoma flavovirens	46181--46226	16	2.6	19	77	19	55	67	0	0	32	0.91	TAAATAAAATATAATAATA
Tricholoma flavovirens	47200--47243	23	1.9	23	81	9	54	45	4	2	47	1.35	ATTAATAATTTTTATAAAATTCA
Tricholoma flavovirens	47945--47986	13	3.5	13	75	18	54	54	4	4	35	1.42	AATATAGTCTAAT
Tricholoma flavovirens	47932--47989	23	2.5	23	97	0	107	56	3	5	34	1.38	AATAATATATAAAAATATAGTCT
Tricholoma flavovirens	48523--48589	11	6.2	11	76	13	50	77	4	0	17	0.93	AAAATAAATAA
Tricholoma flavovirens	48535--48584	19	2.5	20	78	12	59	78	2	0	20	0.86	AAATAAATAAAATAATAAAT
Tricholoma flavovirens	48528--48591	20	2.9	23	77	11	71	76	3	0	20	0.92	AAATAAAAAATAAACAAAATAAT
Tricholoma flavovirens	48534--48589	28	2	29	82	10	71	78	3	0	17	0.89	AAAATAAATAAAATAAAAATAAACAAAAC
Tricholoma flavovirens	49377--49410	11	2.9	12	82	8	52	79	5	0	14	0.91	AAACAAAATAAT
Tricholoma saponaceum	2730--2792	16	3.9	16	76	13	58	76	7	0	15	1.01	TAAACTAAAATAAAAA
Tricholoma saponaceum	6915--7009	19	5	19	94	0	172	34	10	0	54	1.35	CAAATTTTCTTAAATATTT
Tricholoma saponaceum	8286--8324	15	2.5	16	83	4	53	28	0	2	69	1.02	ATTATTATTTTTTTAT
Tricholoma saponaceum	8578--8603	9	2.9	9	100	0	52	23	42	0	34	1.54	AACCTTCTC
Tricholoma saponaceum	10542--10646	55	1.9	54	96	1	192	27	17	9	45	1.79	AATATATCTTCATCTTTCTTGTGGTGTTTGTTTCCTAAAACAAATATATCCTCA
Tricholoma saponaceum	10892--10967	6	12	6	73	22	59	76	0	3	19	0.94	AAAATA
Tricholoma saponaceum	10893--10967	19	3.8	20	71	20	61	76	0	4	20	0.95	AAATAAAAATAAAAATAAAT
Tricholoma saponaceum	10893--10967	33	2.3	32	81	16	93	76	0	4	20	0.95	AAATAAAAATAAAAATAAAAATAAATAGAATA
Tricholoma saponaceum	12775--12851	36	2.1	36	100	0	154	41	5	5	48	1.48	ATTATTACTATTATATAATTTAAATAGCTAATTTAG
Tricholoma saponaceum	13099--13220	39	3.2	39	65	23	112	29	13	13	42	1.84	AAGTCTAAGTGGTTGAATATCTATCTTTGATCTCCTATG
Tricholoma saponaceum	15312--15491	57	3.2	57	94	1	317	40	16	22	20	1.91	AATGTTAATGACGGATCAGTAACTCCAACACCCAGAGGTAGAAGATTAGAACGAGGT
Tricholoma saponaceum	16173--16241	8	8.5	8	95	3	120	63	0	0	36	0.94	AATAAATT
Tricholoma saponaceum	18701--18755	27	2	27	89	0	83	45	3	29	21	1.69	GAAAGGAGTCAATAATAGAATAAATGG
Tricholoma saponaceum	18798--18822	12	2.1	12	100	0	50	24	8	32	36	1.84	TGTGGATCTGAA
Tricholoma saponaceum	19496--19549	27	2	27	88	0	81	40	1	18	38	1.61	ATGTTGATAAACTAATTAATGAAGTAT
Tricholoma saponaceum	23634--23675	6	7	6	100	0	84	66	0	16	16	1.25	AGATAA
Tricholoma saponaceum	23634--23684	18	2.8	18	91	5	68	68	0	15	15	1.21	AGATAAAGAAAAAGATAA
Tricholoma saponaceum	24183--24210	12	2.3	12	100	0	56	85	14	0	0	0.59	AAAACAAAACAA
Tricholoma saponaceum	25662--25701	21	1.9	21	94	0	71	37	10	2	50	1.5	TTATAATATCTCAGTTTAAAT
Tricholoma saponaceum	25964--26005	5	8.8	5	87	5	52	66	19	0	14	1.25	AAACT
Tricholoma saponaceum	26997--27100	13	7.6	14	71	18	58	71	0	2	25	1.06	AAAATAAAATAATA
Tricholoma saponaceum	27020--27066	18	2.4	19	75	13	51	65	0	6	27	1.16	ATAAAAATAAAAAGATAAT
Tricholoma saponaceum	27076--27105	13	2.2	14	94	5	53	80	0	0	20	0.72	AATAAAAATAAATA
Tricholoma saponaceum	28093--28129	5	7.4	5	100	0	74	59	0	0	40	0.97	ATATA
Tricholoma saponaceum	28090--28143	10	5.6	10	84	8	58	53	0	0	46	1	ATTATATAAT
Tricholoma saponaceum	28364--28419	7	8	7	100	0	112	28	28	0	42	1.56	CTATTAC
Tricholoma saponaceum	29066--29127	6	10.3	6	73	13	56	77	1	1	19	0.94	AAAAAT
Tricholoma saponaceum	29066--29130	24	2.7	24	85	7	87	76	1	1	20	0.94	AAAAATAAAATAATAAAAAATAAT
Tricholoma saponaceum	30688--30730	6	7.2	6	97	0	77	81	0	0	18	0.69	AAAATA
Tricholoma saponaceum	33046--33119	4	18.5	4	91	0	121	24	1	2	71	1.07	ATTT
Tricholoma saponaceum	34136--34269	67	2	67	100	0	268	31	13	7	47	1.7	TTGAAACCTTCATAGCTATATTTTCTTTAACCTTTTTTTAATATACTATAAGATATTTTATGACT
Tricholoma saponaceum	37774--37875	5	19.4	5	73	18	59	17	2	4	74	1.12	TTTAT
Tricholoma saponaceum	38213--38302	6	15	6	95	0	162	64	1	0	34	1.01	AATATA
Tricholoma saponaceum	38362--38437	3	25.3	3	86	0	107	65	1	0	32	1.01	ATA
Tricholoma saponaceum	38552--38586	4	8.8	4	100	0	70	74	0	0	25	0.82	AATA
Tricholoma saponaceum	38555--38629	12	5.8	13	76	4	55	65	1	1	32	1.09	AAATAAATAATTA
Tricholoma saponaceum	38719--38747	15	1.9	15	100	0	58	48	0	13	37	1.43	TATTAATAGAGAATT
Tricholoma saponaceum	40389--40463	6	12.5	6	100	0	150	0	16	0	84	0.63	TTTCTT
Tricholoma saponaceum	40470--40546	5	15.4	5	91	0	91	9	0	19	71	1.12	TTGTT
Tricholoma saponaceum	40472--40545	15	4.9	15	94	0	112	9	0	20	70	1.15	GTTTAGTTTTGTTTA
Tricholoma saponaceum	40774--40813	6	6.7	6	97	0	71	62	0	2	35	1.09	ATATAA
Tricholoma saponaceum	43464--43507	15	2.9	15	93	0	70	68	0	0	31	0.9	ATAAAATAAAATTAA
Tricholoma saponaceum	43467--43512	5	9.2	5	90	0	56	65	0	0	34	0.93	AAATT
Tricholoma saponaceum	43467--43512	15	3.1	15	90	0	65	65	0	0	34	0.93	AAATAAAATTAAATT
Tricholoma saponaceum	44312--44371	6	9.8	6	85	10	70	16	0	0	83	0.65	ATTTTT
Tricholoma saponaceum	44313--44371	7	8.4	7	85	14	86	15	0	0	84	0.62	TTTTTAT
Tricholoma saponaceum	44312--44371	28	2.2	27	91	8	95	16	0	0	83	0.65	ATTTTTATTTTTTATTTTTTATTTTTT
Tricholoma saponaceum	44982--45086	9	11.7	9	91	0	174	35	9	0	55	1.33	TCTTAATAT
Tricholoma saponaceum	46026--46052	6	4.5	6	100	0	54	0	0	14	85	0.61	TTTTGT
Tricholoma saponaceum	46429--46467	5	7.6	5	94	5	69	43	0	0	56	0.99	ATATT
Tricholoma saponaceum	46685--46747	3	21	3	93	0	108	66	0	0	33	0.92	AAT
Tricholoma saponaceum	46921--46948	6	4.7	6	100	0	56	64	0	0	35	0.94	TTAAAA
Tricholoma saponaceum	47847--47929	7	11.9	7	100	0	166	28	0	0	71	0.87	TTATTAT
Tricholoma saponaceum	48173--48263	23	4	23	91	0	146	47	17	3	31	1.64	ATCCTCTCATATAAAGTAAATAT
Tricholoma saponaceum	48548--48574	13	2.1	13	100	0	54	18	0	0	81	0.69	ATTTTTATTTTTT
Tricholoma saponaceum	48734--48780	5	9	5	86	9	67	78	0	0	21	0.75	AATAA
Tricholoma saponaceum	48737--48780	22	2	22	95	0	79	79	0	0	20	0.73	AATAAAAAATAAAATAAAATAA
Tricholoma saponaceum	49741--49788	24	2	24	100	0	96	33	4	8	54	1.5	TTTTATATTATATTCTGATTAGAA
Tricholoma saponaceum	49851--49890	7	5.7	7	82	11	55	15	0	2	82	0.77	TTTTTTA
Tricholoma saponaceum	50156--50193	17	2.3	17	86	4	51	15	5	2	76	1.08	TTTTATTTCTAATTTAT
Tricholoma saponaceum	50216--50298	7	11.9	7	100	0	166	28	0	0	71	0.87	TATTATT
Tricholoma saponaceum	50738--50796	6	9.8	6	100	0	118	0	0	15	84	0.62	TTTTTG
Tricholoma saponaceum	51508--51550	5	8.6	5	100	0	86	18	0	0	81	0.69	TTTAT
Tricholoma saponaceum	51582--51630	8	6.1	8	100	0	98	36	0	0	63	0.95	TAATTTAT
Tricholoma saponaceum	52297--52383	6	14.3	6	90	7	131	36	0	0	63	0.95	TATATT
Tricholoma saponaceum	53640--53693	4	13.3	4	90	2	81	68	0	0	31	0.9	TAAA
Tricholoma saponaceum	53640--53693	16	3.3	16	94	2	90	68	0	0	31	0.9	TAAATAAATAATTAAA
Tricholoma saponaceum	56085--56127	7	6.1	7	97	0	77	69	2	0	27	1	ATATAAA
Tricholoma saponaceum	58588--58627	6	6.7	6	100	0	80	32	0	0	67	0.91	TTTATA
Tricholoma saponaceum	58738--58795	6	9.7	6	90	5	91	32	0	0	67	0.91	ATTTAT
Tricholoma saponaceum	58964--59043	7	11.7	7	81	10	67	37	1	1	60	1.13	ATTAATT
Tricholoma saponaceum	58964--59016	14	3.8	14	94	0	88	33	0	0	66	0.92	ATTAATTATTATTT
Tricholoma saponaceum	58964--59016	21	2.5	21	93	0	97	33	0	0	66	0.92	ATTAATTATTATTTATTATTT
Tricholoma saponaceum	59249--59289	18	2.3	18	91	0	64	36	0	14	48	1.44	TTATTTATGAAAGATTAA
Tricholoma saponaceum	59262--59326	21	3	21	84	2	67	49	0	10	40	1.38	ATTATTAATTATTAAAGATTA
Tricholoma saponaceum	59294--59340	7	6.7	7	100	0	94	57	0	12	29	1.36	ATTAAAG
Tricholoma saponaceum	59276--59340	21	3.1	21	90	0	94	55	0	10	33	1.35	AAAGATTAAAGATTAAAGATT
Tricholoma saponaceum	59467--59492	9	2.9	9	100	0	52	42	0	0	57	0.98	ATTATTATA
Tricholoma saponaceum	60284--60343	19	3.2	19	86	6	70	28	1	1	68	1.09	ATTTATTTAATTTATATTC
Tricholoma saponaceum	60962--60995	4	8.5	4	86	0	50	32	0	0	67	0.91	TATT
Tricholoma saponaceum	61178--61212	12	2.9	12	100	0	70	40	0	0	60	0.97	ATATTTATATTA
Tricholoma saponaceum	61165--61215	18	2.8	18	87	3	66	37	3	0	58	1.16	ATATTAATATTTATATTA
Tricholoma saponaceum	61207--61239	16	2.1	16	88	11	50	30	3	0	66	1.06	TATATTTTATTATTTA
Tricholoma saponaceum	61234--61269	5	7.4	5	96	3	65	38	0	0	61	0.96	ATTTA
Tricholoma saponaceum	61178--61240	24	2.7	21	83	14	63	34	1	0	63	1.04	ATATTTATATTTATTATATTA
Tricholoma saponaceum	61775--61837	6	10.7	6	96	3	119	31	0	0	68	0.9	TATTTA
Tricholoma saponaceum	61960--62053	9	11.1	9	80	13	119	23	0	8	68	1.17	TATTTGTAT
Tricholoma saponaceum	61960--62044	16	5.3	16	78	12	93	23	0	8	68	1.16	TATTTTTATATATTTG
Tricholoma saponaceum	61958--62063	25	4.2	25	100	0	212	24	0	7	67	1.16	TATATTTGTATTATTTGTATTTTTA
Tricholoma saponaceum	62153--62215	9	6.6	9	76	20	65	22	3	3	71	1.14	ATTTATTTT
Tricholoma saponaceum	62526--62597	16	4.4	16	73	19	53	33	1	1	63	1.11	TATTTATATTATTATT
Tricholoma saponaceum	62523--62578	19	2.7	21	76	18	55	32	1	0	66	1.03	TTATATATATATTTTATTTAT
Tricholoma saponaceum	62562--62591	6	5	6	91	0	51	36	0	0	63	0.95	TATTTA
Tricholoma saponaceum	62523--62580	20	2.8	19	75	19	55	32	1	0	65	1.03	TTATATTTATATTTATTTT
Tricholoma saponaceum	62729--62786	5	11.6	5	96	0	107	58	0	0	41	0.98	TAATA
Tricholoma saponaceum	63655--63721	6	11.2	6	88	0	80	58	2	0	38	1.14	ATAAAT
Tricholoma saponaceum	63655--63721	30	2.2	30	94	0	116	58	2	0	38	1.14	ATAAATATAAATATAATTCTAAATATAAAT
Tricholoma saponaceum	64027--64074	24	2	24	91	0	78	47	4	0	47	1.21	AATTACTAAATTATTAAATTATTA
Tricholoma saponaceum	64036--64137	8	12.6	8	84	10	109	41	0	1	56	1.1	ATTATTAT
Tricholoma saponaceum	64070--64134	25	2.6	25	86	9	89	36	0	3	60	1.13	TATTATATTATTATATATAATTATA
Tricholoma saponaceum	65354--65436	6	13.8	6	84	0	103	37	3	0	59	1.15	ATTTAT
Tricholoma saponaceum	65894--65980	9	9.8	9	98	1	167	33	0	0	66	0.92	TTTAATTAT
Tricholoma saponaceum	69979--70021	17	2.5	17	88	3	59	46	0	0	53	1	TTATTTAATTAATATAA
Tricholoma saponaceum	69984--70021	9	4.3	9	90	6	60	47	0	0	52	1	TAATTAATT
Tricholoma saponaceum	76385--76438	6	9	6	78	8	56	77	1	3	16	1	AAATAA
Tricholoma saponaceum	77702--77733	10	3.3	10	95	4	57	84	15	0	0	0.63	AAAACAAACA
Tricholoma saponaceum	81588--81626	18	2.1	19	85	4	53	35	0	0	64	0.94	ATTTTATAATTATATAATT
Tricholoma saponaceum	82151--82199	21	2.2	22	85	7	64	28	4	8	59	1.45	TATTTATTCTTAGAAGTAATTT
Tricholoma saponaceum	84332--84374	4	10.8	4	80	9	52	27	0	0	72	0.85	TTTA
Tricholoma saponaceum	84452--84497	18	2.6	18	89	6	67	13	0	2	84	0.71	TTTATTTTATTTTTTTAT
Tricholoma saponaceum	84452--84495	13	3.6	13	82	11	58	11	0	2	86	0.66	TTTATTTTTTTAT
Tricholoma saponaceum	84452--84497	23	2	23	87	8	67	13	0	2	84	0.71	TTTATTTTTTTTTTTGATTTTAT
Tricholoma saponaceum	85691--85736	7	6.6	7	97	0	74	36	0	0	63	0.95	TTTATAA
Tricholoma saponaceum	86408--86479	6	11.8	6	86	1	99	59	1	0	38	1.06	AATATA
Tricholoma saponaceum	86406--86479	18	4.1	18	92	3	123	59	1	0	39	1.06	ATAATTATAAATATAAAT
Tricholoma saponaceum	90008--90044	5	7.8	5	91	8	51	24	0	10	64	1.25	TTTAG
Tricholoma saponaceum	90043--90087	6	7.7	6	92	5	65	17	4	8	68	1.32	TATTTG
Tricholoma saponaceum	90449--90490	10	4.1	10	81	12	50	26	0	2	71	0.98	TTTAATTTTA
Tricholoma saponaceum	90728--90772	15	2.9	16	79	20	51	60	0	6	33	1.23	AAAATATAATTATAGA
Tricholoma saponaceum	91353--91415	4	14.8	4	88	8	81	20	0	0	79	0.73	TTTA
Tricholoma saponaceum	91353--91417	17	3.8	17	89	6	105	20	0	0	80	0.72	TTTATTTTATTTTTTTA
Tricholoma saponaceum	91427--91517	6	15.8	6	76	11	84	0	0	26	73	0.83	TTTGTG
Tricholoma saponaceum	91424--91525	24	4.1	25	79	17	115	0	0	25	74	0.82	TTTTTTGTGTTGTGTTTGGTTTTGT
Tricholoma saponaceum	91427--91529	28	3.8	28	82	14	153	0	0	26	73	0.83	TTTGTGTTTGTTTGGTTTTGTTTTTTTG
Tricholoma saponaceum	91428--91519	46	2	46	89	8	143	0	0	26	73	0.83	TTGTGTTTGTTTGTGTTTGGTTTTGTTTTTTTGTTTGTGTTTGTTT
Tricholoma saponaceum	91427--91525	52	1.9	51	91	6	164	0	0	26	73	0.83	TTTGTTTGTGTTTGGTTTTGTTTTTTTGTTTGTGTTTGTTTGGTTTTTGTG
Tricholoma saponaceum	91425--91558	6	21.8	6	68	18	62	2	0	22	74	0.97	TTTTTG
Tricholoma saponaceum	92422--92473	7	7.9	7	89	6	74	28	0	0	71	0.87	TTATATT
Tricholoma saponaceum	93601--93755	77	2	77	100	0	310	40	3	6	49	1.47	ATAACAGATTGATTAATTTATCTTTGTATTATAAATATCATTTATATTTATATTATTTGTTTAAA
Tricholoma saponaceum	93852--93909	6	9.5	6	90	1	89	65	0	0	34	0.93	AAATAT
Tricholoma saponaceum	93852--93909	24	2.4	24	97	2	107	65	0	0	34	0.93	AAATATAAATATAATTATAAATAT

## Sheet: Table S7
Table S7 Distribution of repeat loci in the five Tricholoma mitogenomes searched by REPuter
Species	1st repeat length	Starting position	Match direction	2nd repeat length	Starting position	E-value
Tricholoma matsutake SCYJ1	160	18906	F	160	22831	7.38e-88
Tricholoma matsutake SCYJ1	121	18786	F	121	18907	2.23e-64
Tricholoma matsutake SCYJ1	121	18786	F	121	22832	2.23e-64
Tricholoma matsutake SCYJ1	49	18233	P	49	57792	4.97e-21
Tricholoma matsutake SCYJ1	49	60205	R	49	60205	4.97e-21
Tricholoma matsutake SCYJ1	46	47043	R	46	47043	3.18e-19
Tricholoma matsutake SCYJ1	44	8765	F	44	60658	5.09e-18
Tricholoma matsutake SCYJ1	44	61046	F	44	63281	5.09e-18
Tricholoma matsutake SCYJ1	41	34354	R	41	34354	3.26e-16
Tricholoma matsutake SCYJ1	41	47042	R	41	47042	3.26e-16
Tricholoma matsutake SCYJ1	40	8778	F	40	60706	1.3e-15
Tricholoma matsutake SCYJ1	40	47042	F	40	47049	1.3e-15
Tricholoma matsutake SCYJ1	40	47564	R	40	47564	1.3e-15
Tricholoma matsutake SCYJ1	39	18232	C	39	47042	5.22e-15
Tricholoma matsutake SCYJ1	39	18232	P	39	47044	5.22e-15
Tricholoma matsutake SCYJ1	39	18232	C	39	47049	5.22e-15
Tricholoma matsutake SCYJ1	39	47050	R	39	47050	5.22e-15
Tricholoma matsutake SCYJ1	39	47562	R	39	47562	5.22e-15
Tricholoma matsutake SCYJ1	38	11656	F	38	11688	2.09e-14
Tricholoma matsutake SCYJ1	38	18233	P	38	47051	2.09e-14
Tricholoma matsutake SCYJ1	38	47043	R	38	57803	2.09e-14
Tricholoma matsutake SCYJ1	38	47044	F	38	57803	2.09e-14
Tricholoma matsutake SCYJ1	38	47050	R	38	57803	2.09e-14
Tricholoma matsutake SCYJ1	38	47051	F	38	57803	2.09e-14
Tricholoma matsutake SCYJ1	37	8798	R	37	8798	8.35e-14
Tricholoma matsutake SCYJ1	37	18234	R	37	18234	8.35e-14
Tricholoma matsutake SCYJ1	37	18234	C	37	57803	8.35e-14
Tricholoma matsutake SCYJ1	37	47562	F	37	47567	8.35e-14
Tricholoma matsutake SCYJ1	37	51844	R	37	51844	8.35e-14
Tricholoma matsutake SCYJ1	37	57803	R	37	57803	8.35e-14
Tricholoma matsutake SCYJ1	35	34354	R	35	34354	1.34e-12
Tricholoma matsutake SCYJ1	35	34354	F	35	34360	1.34e-12
Tricholoma matsutake SCYJ1	35	34360	R	35	34360	1.34e-12
Tricholoma matsutake SCYJ1	35	47569	R	35	47569	1.34e-12
Tricholoma matsutake SCYJ1	35	51848	R	35	51848	1.34e-12
Tricholoma matsutake SCYJ1	35	59731	R	35	59731	1.34e-12
Tricholoma matsutake SCYJ1	35	61010	F	35	61814	1.34e-12
Tricholoma matsutake SCYJ1	34	18232	R	34	18232	5.34e-12
Tricholoma matsutake SCYJ1	34	18232	P	34	47042	5.34e-12
Tricholoma matsutake SCYJ1	34	47042	R	34	47042	5.34e-12
Tricholoma matsutake SCYJ1	34	47562	R	34	47562	5.34e-12
Tricholoma matsutake SCYJ1	33	18232	C	33	47056	2.14e-11
Tricholoma matsutake SCYJ1	33	18232	C	33	57808	2.14e-11
Tricholoma matsutake SCYJ1	33	47042	F	33	47056	2.14e-11
Tricholoma matsutake SCYJ1	33	47042	F	33	57808	2.14e-11
Tricholoma matsutake SCYJ1	33	51844	F	33	51850	2.14e-11
Tricholoma matsutake SCYJ1	32	18232	F	32	18239	8.55e-11
Tricholoma matsutake SCYJ1	32	18232	P	32	57803	8.55e-11
Tricholoma matsutake SCYJ1	32	18239	C	32	47042	8.55e-11
Tricholoma matsutake SCYJ1	32	47042	R	32	57803	8.55e-11
Tricholoma bakamatsutake	82	45101	R	82	45101	1.28e-40
Tricholoma bakamatsutake	79	12492	R	79	12492	8.18e-39
Tricholoma bakamatsutake	78	82747	R	78	82747	3.27e-38
Tricholoma bakamatsutake	77	82747	R	77	82747	1.31e-37
Tricholoma bakamatsutake	77	82747	F	77	82748	1.31e-37
Tricholoma bakamatsutake	77	82748	R	77	82748	1.31e-37
Tricholoma bakamatsutake	76	82747	R	76	82747	5.24e-37
Tricholoma bakamatsutake	76	82747	F	76	82749	5.24e-37
Tricholoma bakamatsutake	76	82749	R	76	82749	5.24e-37
Tricholoma bakamatsutake	75	12491	R	75	12491	2.09e-36
Tricholoma bakamatsutake	75	82747	R	75	82747	2.09e-36
Tricholoma bakamatsutake	75	82747	F	75	82750	2.09e-36
Tricholoma bakamatsutake	75	82750	R	75	82750	2.09e-36
Tricholoma bakamatsutake	74	12491	F	74	12497	8.38e-36
Tricholoma bakamatsutake	74	82747	R	74	82747	8.38e-36
Tricholoma bakamatsutake	74	82747	F	74	82751	8.38e-36
Tricholoma bakamatsutake	74	82751	R	74	82751	8.38e-36
Tricholoma bakamatsutake	73	12498	R	73	12498	3.35e-35
Tricholoma bakamatsutake	73	45102	R	73	45102	3.35e-35
Tricholoma bakamatsutake	73	45102	F	73	45109	3.35e-35
Tricholoma bakamatsutake	73	45109	R	73	45109	3.35e-35
Tricholoma bakamatsutake	73	82747	R	73	82747	3.35e-35
Tricholoma bakamatsutake	73	82747	F	73	82752	3.35e-35
Tricholoma bakamatsutake	73	82752	R	73	82752	3.35e-35
Tricholoma bakamatsutake	72	25190	R	72	25190	1.34e-34
Tricholoma bakamatsutake	72	82747	R	72	82747	1.34e-34
Tricholoma bakamatsutake	72	82747	F	72	82753	1.34e-34
Tricholoma bakamatsutake	72	82753	R	72	82753	1.34e-34
Tricholoma bakamatsutake	71	25192	R	71	25192	5.36e-34
Tricholoma bakamatsutake	71	82747	R	71	82747	5.36e-34
Tricholoma bakamatsutake	71	82747	F	71	82754	5.36e-34
Tricholoma bakamatsutake	71	82754	R	71	82754	5.36e-34
Tricholoma bakamatsutake	70	25190	F	70	25193	2.14e-33
Tricholoma bakamatsutake	70	82747	R	70	82747	2.14e-33
Tricholoma bakamatsutake	70	82747	F	70	82755	2.14e-33
Tricholoma bakamatsutake	70	82755	R	70	82755	2.14e-33
Tricholoma bakamatsutake	69	12491	R	69	12491	8.58e-33
Tricholoma bakamatsutake	69	25190	R	69	25190	8.58e-33
Tricholoma bakamatsutake	69	82747	R	69	82747	8.58e-33
Tricholoma bakamatsutake	69	82747	F	69	82756	8.58e-33
Tricholoma bakamatsutake	69	82756	R	69	82756	8.58e-33
Tricholoma bakamatsutake	68	12491	F	68	12503	3.43e-32
Tricholoma bakamatsutake	68	25195	R	68	25195	3.43e-32
Tricholoma bakamatsutake	68	82747	R	68	82747	3.43e-32
Tricholoma bakamatsutake	68	82747	F	68	82757	3.43e-32
Tricholoma bakamatsutake	68	82757	R	68	82757	3.43e-32
Tricholoma bakamatsutake	67	12504	R	67	12504	1.37e-31
Tricholoma bakamatsutake	67	25190	F	67	25196	1.37e-31
Tricholoma bakamatsutake	67	82747	R	67	82747	1.37e-31
Tricholoma bakamatsutake	67	82747	F	67	82758	1.37e-31
Tricholoma terreum	147	27530	F	147	37771	5.76e-80
Tricholoma terreum	105	19532	P	105	27682	1.11e-54
Tricholoma terreum	76	41670	F	76	47258	3.21e-37
Tricholoma terreum	73	47592	R	73	47592	2.05e-35
Tricholoma terreum	69	47597	R	69	47597	5.26e-33
Tricholoma terreum	68	47592	F	68	47598	2.1e-32
Tricholoma terreum	67	47592	R	67	47592	8.41e-32
Tricholoma terreum	63	27796	R	63	27796	2.15e-29
Tricholoma terreum	63	47603	R	63	47603	2.15e-29
Tricholoma terreum	62	28907	P	62	39471	8.61e-29
Tricholoma terreum	62	47592	F	62	47604	8.61e-29
Tricholoma terreum	61	47592	R	61	47592	3.45e-28
Tricholoma terreum	59	27796	R	59	27796	5.51e-27
Tricholoma terreum	59	27796	F	59	27800	5.51e-27
Tricholoma terreum	59	27800	R	59	27800	5.51e-27
Tricholoma terreum	57	17509	P	57	37608	8.82e-26
Tricholoma terreum	57	47609	R	57	47609	8.82e-26
Tricholoma terreum	56	47592	F	56	47610	3.53e-25
Tricholoma terreum	56	78613	F	56	78649	3.53e-25
Tricholoma terreum	55	27796	R	55	27796	1.41e-24
Tricholoma terreum	55	27796	F	55	27804	1.41e-24
Tricholoma terreum	55	27804	R	55	27804	1.41e-24
Tricholoma terreum	55	47592	R	55	47592	1.41e-24
Tricholoma terreum	53	59959	F	53	59965	2.26e-23
Tricholoma terreum	51	27796	R	51	27796	3.61e-22
Tricholoma terreum	51	27796	F	51	27808	3.61e-22
Tricholoma terreum	51	27808	R	51	27808	3.61e-22
Tricholoma terreum	51	47615	R	51	47615	3.61e-22
Tricholoma terreum	50	47592	F	50	47616	1.45e-21
Tricholoma terreum	49	47592	R	49	47592	5.78e-21
Tricholoma terreum	49	78688	F	49	78694	5.78e-21
Tricholoma terreum	47	27796	R	47	27796	9.25e-20
Tricholoma terreum	47	27796	F	47	27812	9.25e-20
Tricholoma terreum	47	27812	R	47	27812	9.25e-20
Tricholoma terreum	47	34257	R	47	34257	9.25e-20
Tricholoma terreum	47	34262	R	47	34262	9.25e-20
Tricholoma terreum	47	59959	F	47	59971	9.25e-20
Tricholoma terreum	46	10139	F	46	10180	3.7e-19
Tricholoma terreum	45	47621	R	45	47621	1.48e-18
Tricholoma terreum	44	47592	F	44	47622	5.92e-18
Tricholoma terreum	43	27796	R	43	27796	2.37e-17
Tricholoma terreum	43	27796	F	43	27816	2.37e-17
Tricholoma terreum	43	27816	R	43	27816	2.37e-17
Tricholoma terreum	43	47592	R	43	47592	2.37e-17
Tricholoma terreum	43	78688	F	43	78700	2.37e-17
Tricholoma terreum	42	34257	F	42	34267	9.47e-17
Tricholoma terreum	42	77285	F	42	77305	9.47e-17
Tricholoma terreum	41	59959	F	41	59977	3.79e-16
Tricholoma terreum	39	27796	R	39	27796	6.06e-15
Tricholoma terreum	39	27796	F	39	27820	6.06e-15
Tricholoma flavovirens	133	23792	F	133	26630	5.81e-72
Tricholoma flavovirens	88	16699	F	88	31345	7.19e-45
Tricholoma flavovirens	63	10948	P	63	18875	8.09e-30
Tricholoma flavovirens	53	10788	P	53	18936	8.49e-24
Tricholoma flavovirens	51	23927	F	51	26764	1.36e-22
Tricholoma flavovirens	50	16641	F	50	31287	5.43e-22
Tricholoma flavovirens	48	9004	F	48	13857	8.69e-21
Tricholoma flavovirens	39	23752	F	39	26590	2.28e-15
Tricholoma flavovirens	34	12316	R	34	12316	2.33e-12
Tricholoma flavovirens	34	48557	F	34	49375	2.33e-12
Tricholoma flavovirens	33	26450	R	33	26450	9.33e-12
Tricholoma flavovirens	31	26447	R	31	26447	1.49e-10
Tricholoma flavovirens	31	27027	F	31	28568	1.49e-10
Tricholoma flavovirens	30	16947	P	30	16947	5.97e-10
Tricholoma flavovirens	30	47936	F	30	47959	5.97e-10
Tricholoma flavovirens	28	4967	F	28	4975	9.56e-09
Tricholoma flavovirens	28	7834	F	28	9806	9.56e-09
Tricholoma flavovirens	28	21635	R	28	21635	9.56e-09
Tricholoma flavovirens	28	26447	F	28	26455	9.56e-09
Tricholoma flavovirens	27	12324	R	27	12324	3.82e-08
Tricholoma flavovirens	27	21640	P	27	45339	3.82e-08
Tricholoma flavovirens	26	12316	F	26	12325	1.53e-07
Tricholoma flavovirens	25	12316	R	25	12316	6.12e-07
Tricholoma flavovirens	25	26458	R	25	26458	6.12e-07
Tricholoma flavovirens	25	46772	P	25	47257	6.12e-07
Tricholoma flavovirens	24	15855	P	24	15855	2.45e-06
Tricholoma flavovirens	24	21631	R	24	21631	2.45e-06
Tricholoma flavovirens	24	21641	R	24	46773	2.45e-06
Tricholoma flavovirens	24	21641	C	24	47257	2.45e-06
Tricholoma flavovirens	24	41381	R	24	41381	2.45e-06
Tricholoma flavovirens	24	45341	C	24	46773	2.45e-06
Tricholoma flavovirens	24	45341	R	24	47257	2.45e-06
Tricholoma flavovirens	23	3389	R	23	3389	9.79e-06
Tricholoma flavovirens	23	12232	R	23	12232	9.79e-06
Tricholoma flavovirens	23	21635	C	23	45343	9.79e-06
Tricholoma flavovirens	23	26447	R	23	26447	9.79e-06
Tricholoma flavovirens	23	40088	R	23	40088	9.79e-06
Tricholoma flavovirens	22	14620	R	22	14620	3.91e-05
Tricholoma flavovirens	22	14930	R	22	37046	3.91e-05
Tricholoma flavovirens	22	17297	C	22	46190	3.91e-05
Tricholoma flavovirens	22	21635	F	22	46775	3.91e-05
Tricholoma flavovirens	22	21635	P	22	47257	3.91e-05
Tricholoma flavovirens	22	34103	P	22	34103	3.91e-05
Tricholoma flavovirens	22	45368	F	22	46117	3.91e-05
Tricholoma flavovirens	22	46180	F	22	46189	3.91e-05
Tricholoma flavovirens	21	5145	P	21	27609	0.000157
Tricholoma flavovirens	21	12305	P	21	21624	0.000157
Tricholoma flavovirens	21	14620	F	21	14932	0.000157
Tricholoma flavovirens	21	14621	R	21	14932	0.000157
Tricholoma flavovirens	21	14933	R	21	45361	0.000157
Tricholoma saponaceum	519	29100	F	519	76411	0
Tricholoma saponaceum	147	24416	P	147	89480	7.85e-80
Tricholoma saponaceum	130	31421	P	130	37391	1.35e-69
Tricholoma saponaceum	116	67949	F	116	90830	3.62e-61
Tricholoma saponaceum	106	46257	F	106	51289	3.8e-55
Tricholoma saponaceum	83	50215	R	83	50215	2.67e-41
Tricholoma saponaceum	82	47847	F	82	50215	1.07e-40
Tricholoma saponaceum	82	47847	R	82	50216	1.07e-40
Tricholoma saponaceum	81	47848	R	81	47848	4.27e-40
Tricholoma saponaceum	81	61957	F	81	61982	4.27e-40
Tricholoma saponaceum	78	31913	P	78	36948	2.74e-38
Tricholoma saponaceum	78	47846	R	78	47846	2.74e-38
Tricholoma saponaceum	78	93600	F	78	93677	2.74e-38
Tricholoma saponaceum	77	24253	F	77	63106	1.09e-37
Tricholoma saponaceum	77	47846	R	77	50215	1.09e-37
Tricholoma saponaceum	77	47846	F	77	50221	1.09e-37
Tricholoma saponaceum	76	47846	F	76	47853	4.38e-37
Tricholoma saponaceum	76	50215	R	76	50215	4.38e-37
Tricholoma saponaceum	76	50215	F	76	50222	4.38e-37
Tricholoma saponaceum	76	50222	R	76	50222	4.38e-37
Tricholoma saponaceum	75	47854	F	75	50215	1.75e-36
Tricholoma saponaceum	75	47854	R	75	50223	1.75e-36
Tricholoma saponaceum	74	47855	R	74	47855	7e-36
Tricholoma saponaceum	74	65893	F	74	65902	7e-36
Tricholoma saponaceum	73	40388	R	73	40388	2.8e-35
Tricholoma saponaceum	71	40392	R	71	40392	4.48e-34
Tricholoma saponaceum	71	47846	R	71	47846	4.48e-34
Tricholoma saponaceum	70	47846	R	70	50215	1.79e-33
Tricholoma saponaceum	70	47846	F	70	50228	1.79e-33
Tricholoma saponaceum	69	40388	F	69	40394	7.17e-33
Tricholoma saponaceum	69	47846	F	69	47860	7.17e-33
Tricholoma saponaceum	69	50215	R	69	50215	7.17e-33
Tricholoma saponaceum	69	50215	F	69	50229	7.17e-33
Tricholoma saponaceum	69	50229	R	69	50229	7.17e-33
Tricholoma saponaceum	68	47861	F	68	50215	2.87e-32
Tricholoma saponaceum	68	47861	R	68	50230	2.87e-32
Tricholoma saponaceum	67	34135	F	67	34202	1.15e-31
Tricholoma saponaceum	67	40388	R	67	40388	1.15e-31
Tricholoma saponaceum	67	47862	R	67	47862	1.15e-31
Tricholoma saponaceum	65	40398	R	65	40398	1.84e-30
Tricholoma saponaceum	65	65893	F	65	65911	1.84e-30
Tricholoma saponaceum	64	47846	R	64	47846	7.34e-30
Tricholoma saponaceum	63	40388	F	63	40400	2.94e-29
Tricholoma saponaceum	63	47846	R	63	50215	2.94e-29
Tricholoma saponaceum	63	47846	F	63	50235	2.94e-29
Tricholoma saponaceum	62	47846	F	62	47867	1.17e-28
Tricholoma saponaceum	62	50215	R	62	50215	1.17e-28
Tricholoma saponaceum	62	50215	F	62	50236	1.17e-28
Tricholoma saponaceum	62	50236	R	62	50236	1.17e-28
Tricholoma saponaceum	61	38212	R	61	38212	4.7e-28

## Sheet: Table S8
Table S8 Local BLAST searches between the mitochondrial genomes and the nuclear genomes of the five Tricholoma species
Mitogenome	Nuclear Genome	Identity (%)	Alignment length (bp)	Mismatches (bp)	Gap (bp)	Mitogenome		Nuclear Genome		Evalue
						From	To	From	To
Tricholoma matsutake SCYJ1	PKSN02000346.1	100	33	0	0	32645	32677	90293	90261	2.94e-06
Tricholoma matsutake SCYJ1	PKSN02000193.1	100	33	0	0	43213	43245	35363	35331	2.94e-06
Tricholoma matsutake SCYJ1	PKSN02002291.1	100	35	0	0	3622	3656	463	429	2.27e-07
Tricholoma matsutake SCYJ1	PKSN02001328.1	100	37	0	0	688	724	43054	43018	1.76e-08
Tricholoma matsutake SCYJ1	PKSN02000260.1	100	38	0	0	59338	59375	24922	24885	4.89e-09
Tricholoma matsutake SCYJ1	PKSN02000700.1	97.5	40	1	0	56911	56950	16002	15963	1.76e-08
Tricholoma matsutake SCYJ1	PKSN02001189.1	100	44	0	0	26798	26841	14219	14176	2.26e-12
Tricholoma matsutake SCYJ1	PKSN02000230.1	93.617	47	3	0	24093	24139	114890	114936	4.89e-09
Tricholoma matsutake SCYJ1	PKSN02001197.1	93.617	47	2	1	11292	11338	9030	8985	1.76e-08
Tricholoma matsutake SCYJ1	PKSN02000093.1	98	50	1	0	66753	66802	32093	32142	4.85e-14
Tricholoma matsutake SCYJ1	PKSN02000485.1	92.593	54	2	1	25825	25876	26416	26363	1.05e-10
Tricholoma matsutake SCYJ1	PKSN02001854.1	88.889	54	3	2	16298	16348	9587	9640	8.18e-07
Tricholoma matsutake SCYJ1	PKSN02000909.1	94.444	54	2	1	46898	46951	57989	57937	2.26e-12
Tricholoma matsutake SCYJ1	PKSN02000199.1	100	56	0	0	19964	20019	103150	103095	4.82e-19
Tricholoma matsutake SCYJ1	PKSN02001275.1	93.103	58	4	0	12174	12231	22224	22281	4.85e-14
Tricholoma matsutake SCYJ1	PKSN02000966.1	100	58	0	0	62381	62438	55300	55243	3.72e-20
Tricholoma matsutake SCYJ1	PKSN02001854.1	94.828	58	3	0	37741	37798	9400	9457	3.75e-15
Tricholoma matsutake SCYJ1	PKSN02000105.1	98.276	58	1	0	36503	36560	17450	17393	1.73e-18
Tricholoma matsutake SCYJ1	PKSN02002062.1	98.387	62	1	0	33501	33562	10093	10032	1.04e-20
Tricholoma matsutake SCYJ1	PKSN02001656.1	100	62	0	0	33501	33562	17512	17573	2.23e-22
Tricholoma matsutake SCYJ1	PKSN02001904.1	98.438	64	1	0	16298	16361	1949	2012	8e-22
Tricholoma matsutake SCYJ1	PKSN02002329.1	98.438	64	1	0	16298	16361	17255	17192	8e-22
Tricholoma matsutake SCYJ1	PKSN02002235.1	98.485	66	0	1	64125	64190	6073	6137	2.23e-22
Tricholoma matsutake SCYJ1	PKSN02000711.1	95.522	67	3	0	61164	61230	77842	77908	3.72e-20
Tricholoma matsutake SCYJ1	PKSN02000256.1	95.522	67	3	0	61164	61230	3768	3834	3.72e-20
Tricholoma matsutake SCYJ1	PKSN02001854.1	94.118	68	2	2	27473	27540	9588	9523	1.73e-18
Tricholoma matsutake SCYJ1	PKSN02002319.1	98.592	71	1	0	52068	52138	9661	9731	1.03e-25
Tricholoma matsutake SCYJ1	PKSN02000485.1	97.26	73	2	0	25880	25952	26107	26035	1.03e-25
Tricholoma matsutake SCYJ1	PKSN02000045.1	93.75	80	2	2	8163	8242	76401	76477	6.19e-23
Tricholoma matsutake SCYJ1	PKSN02002062.1	100	85	0	0	60308	60392	16855	16939	3.65e-35
Tricholoma matsutake SCYJ1	PKSN02001527.1	97.802	91	2	0	36917	37007	27386	27296	3.65e-35
Tricholoma matsutake SCYJ1	PKSN02002062.1	98.913	92	0	1	33023	33113	10184	10093	7.84e-37
Tricholoma matsutake SCYJ1	PKSN02001656.1	98.913	92	0	1	33023	33113	17421	17512	7.84e-37
Tricholoma matsutake SCYJ1	PKSN02001498.1	90.323	93	5	3	49634	49725	36243	36332	1.72e-23
Tricholoma matsutake SCYJ1	PKSN02001904.1	94.792	96	5	0	37708	37803	1728	1823	6.1e-33
Tricholoma matsutake SCYJ1	PKSN02000006.1	93.939	99	4	2	34196	34293	9596	9499	2.19e-32
Tricholoma matsutake SCYJ1	PKSN02000440.1	91.919	99	4	4	34199	34295	21512	21416	1.71e-28
Tricholoma matsutake SCYJ1	PKSN02000007.1	97.143	105	3	0	66996	67100	229029	229133	2.16e-42
Tricholoma matsutake SCYJ1	PKSN02000004.1	91.589	107	9	0	32986	33092	454105	453999	2.19e-32
Tricholoma matsutake SCYJ1	PKSN02001455.1	92.035	113	6	2	24145	24255	5972	6083	1.31e-34
Tricholoma matsutake SCYJ1	PKSN02001275.1	95.082	122	5	1	12016	12137	22107	22227	3.59e-45
Tricholoma matsutake SCYJ1	PKSN02000045.1	97.561	123	3	0	7965	8087	76279	76401	2.76e-51
Tricholoma matsutake SCYJ1	PKSN02000007.1	97.619	126	3	0	38369	38494	229134	229259	1.65e-53
Tricholoma matsutake SCYJ1	PKSN02000169.1	96.875	128	3	1	14647	14773	160265	160392	7.67e-52
Tricholoma matsutake SCYJ1	PKSN02001041.1	92.701	137	10	0	6469	6605	44130	43994	2.15e-47
Tricholoma matsutake SCYJ1	PKSN02000004.1	89.781	137	13	1	51386	51521	454002	453866	1.01e-40
Tricholoma matsutake SCYJ1	PKSN02001041.1	95.652	138	4	2	6339	6476	59112	58977	4.58e-54
Tricholoma matsutake SCYJ1	PKSN02000753.1	95.652	138	4	2	6339	6476	14586	14451	4.58e-54
Tricholoma matsutake SCYJ1	PKSN02000004.1	92.086	139	8	3	44250	44387	454246	454110	9.99e-46
Tricholoma matsutake SCYJ1	PKSN02000177.1	96.552	145	5	0	40351	40495	146626	146482	3.52e-60
Tricholoma matsutake SCYJ1	PKSN02000147.1	88.889	171	10	8	34198	34368	98685	98524	1.66e-48
Tricholoma matsutake SCYJ1	PKSN02001498.1	97.207	179	4	1	73321	73499	36264	36087	1.59e-78
Tricholoma matsutake SCYJ1	PKSN02000093.1	93.158	190	8	3	66491	66680	210970	211154	3.47e-70
Tricholoma matsutake SCYJ1	PKSN02003662.1	86.294	197	14	6	60516	60711	357	541	1.66e-48
Tricholoma matsutake SCYJ1	PKSN02000243.1	99.526	211	1	0	64362	64572	127586	127376	1.54e-103
Tricholoma matsutake SCYJ1	PKSN02000425.1	99.091	220	1	1	74166	74385	61827	61609	2.55e-106
Tricholoma matsutake SCYJ1	PKSN02001251.1	95.614	228	5	2	24158	24385	31691	31913	2.59e-96
Tricholoma matsutake SCYJ1	PKSN02000113.1	96.169	261	9	1	56984	57243	112071	112331	9.05e-116
Tricholoma matsutake SCYJ1	PKSN02001656.1	98.864	264	3	0	33558	33821	24857	25120	3.19e-130
Tricholoma matsutake SCYJ1	PKSN02000093.1	93.609	266	16	1	66823	67088	32143	32407	7.1e-107
Tricholoma matsutake SCYJ1	PKSN02000837.1	97.078	308	8	1	31271	31578	43080	42774	1.45e-143
Tricholoma matsutake SCYJ1	PKSN02001656.1	99.367	316	2	0	34331	34646	26316	26631	3.05e-160
Tricholoma matsutake SCYJ1	PKSN02000411.1	85.893	319	28	8	43594	43912	76766	76465	9.44e-86
Tricholoma matsutake SCYJ1	PKSN02000837.1	95.758	330	14	0	31249	31578	41939	41610	1.44e-148
Tricholoma matsutake SCYJ1	PKSN02000169.1	94.118	340	13	1	4396	4735	160117	159785	2.43e-141
Tricholoma matsutake SCYJ1	PKSN02000045.1	93.162	351	21	2	8799	9146	76697	77047	6.75e-142
Tricholoma matsutake SCYJ1	PKSN02000297.1	88.154	363	14	15	58535	58895	104262	103927	3.28e-110
Tricholoma matsutake SCYJ1	PKSN02000629.1	97.541	366	8	1	30224	30589	68245	67881	8.31e-176
Tricholoma matsutake SCYJ1	PKSN02002092.1	98.417	379	6	0	21575	21953	379	1	0
Tricholoma matsutake SCYJ1	PKSN02002062.1	97.727	396	3	1	34331	34726	1629	1240	0
Tricholoma matsutake SCYJ1	PKSN02003067.1	98.305	472	4	4	32433	32902	8049	8518	0
Tricholoma matsutake SCYJ1	PKSN02002062.1	96.61	531	12	2	33651	34175	2981	2451	0
Tricholoma matsutake SCYJ1	PKSN02002226.1	95.876	679	19	7	66005	66680	12086	12758	0
Tricholoma matsutake SCYJ1	PKSN02003350.1	92.895	760	25	11	66135	66887	1	738	0
Tricholoma matsutake SCYJ1	PKSN02000294.1	94.567	1270	45	5	14205	15472	128713	129960	0
Tricholoma bakamatsutake	QLOL01001226.1	100	34	0	0	42904	42937	29281	29314	8.29e-07
Tricholoma bakamatsutake	QLOL01008905.1	100	34	0	0	73484	73517	15901	15868	8.29e-07
Tricholoma bakamatsutake	QLOL01046209.1	100	34	0	0	181	214	2330	2297	8.29e-07
Tricholoma bakamatsutake	QLOL01007668.1	100	34	0	0	98900	98933	18457	18490	8.29e-07
Tricholoma bakamatsutake	QLOL01006388.1	100	34	0	0	26307	26340	19247	19280	8.29e-07
Tricholoma bakamatsutake	QLOL01017856.1	100	35	0	0	36966	37000	90	56	2.3e-07
Tricholoma bakamatsutake	QLOL01016572.1	100	35	0	0	100509	100543	627	661	2.3e-07
Tricholoma bakamatsutake	QLOL01006971.1	100	35	0	0	23510	23544	4927	4893	2.3e-07
Tricholoma bakamatsutake	QLOL01001718.1	100	35	0	0	59628	59662	5888	5922	2.3e-07
Tricholoma bakamatsutake	QLOL01000833.1	100	36	0	0	52202	52237	45197	45232	6.41e-08
Tricholoma bakamatsutake	QLOL01008905.1	100	37	0	0	15653	15689	15973	15937	1.78e-08
Tricholoma bakamatsutake	QLOL01044438.1	100	37	0	0	29960	29996	1512	1476	1.78e-08
Tricholoma bakamatsutake	QLOL01007213.1	100	37	0	0	3618	3654	230	194	1.78e-08
Tricholoma bakamatsutake	QLOL01004432.1	100	37	0	0	29960	29996	3801	3837	1.78e-08
Tricholoma bakamatsutake	QLOL01043501.1	100	38	0	0	45620	45657	13072	13035	4.95e-09
Tricholoma bakamatsutake	QLOL01040449.1	100	38	0	0	72393	72430	71	108	4.95e-09
Tricholoma bakamatsutake	QLOL01012737.1	100	39	0	0	9410	9448	28153	28115	1.38e-09
Tricholoma bakamatsutake	QLOL01005642.1	100	39	0	0	17458	17496	29764	29726	1.38e-09
Tricholoma bakamatsutake	QLOL01010016.1	97.436	39	1	0	67394	67432	2334	2372	6.41e-08
Tricholoma bakamatsutake	QLOL01014219.1	100	40	0	0	59470	59509	2863	2824	3.83e-10
Tricholoma bakamatsutake	QLOL01011257.1	100	40	0	0	73261	73300	2214	2175	3.83e-10
Tricholoma bakamatsutake	QLOL01009145.1	100	40	0	0	40267	40306	757	718	3.83e-10
Tricholoma bakamatsutake	QLOL01043711.1	97.5	40	1	0	16850	16889	11529	11490	1.78e-08
Tricholoma bakamatsutake	QLOL01028811.1	97.5	40	1	0	50818	50857	91	130	1.78e-08
Tricholoma bakamatsutake	QLOL01002967.1	100	41	0	0	42550	42590	63	23	1.06e-10
Tricholoma bakamatsutake	QLOL01010830.1	100	41	0	0	60801	60841	47011	47051	1.06e-10
Tricholoma bakamatsutake	QLOL01002501.1	97.561	41	1	0	50820	50860	19546	19506	4.95e-09
Tricholoma bakamatsutake	QLOL01027911.1	95.122	41	2	0	81998	82038	4058	4098	2.3e-07
Tricholoma bakamatsutake	QLOL01042919.1	100	42	0	0	44884	44925	15211	15252	2.96e-11
Tricholoma bakamatsutake	QLOL01016728.1	97.619	42	1	0	4610	4651	14854	14813	1.38e-09
Tricholoma bakamatsutake	QLOL01002499.1	95.238	42	1	1	12604	12645	22054	22094	2.3e-07
Tricholoma bakamatsutake	QLOL01032548.1	100	43	0	0	50815	50857	595	637	8.23e-12
Tricholoma bakamatsutake	QLOL01028789.1	100	43	0	0	50815	50857	1938	1980	8.23e-12
Tricholoma bakamatsutake	QLOL01009009.1	100	43	0	0	50815	50857	529	571	8.23e-12
Tricholoma bakamatsutake	QLOL01008905.1	97.674	43	1	0	71034	71076	15900	15942	3.83e-10
Tricholoma bakamatsutake	QLOL01004612.1	95.349	43	2	0	50801	50843	4642	4684	1.78e-08
Tricholoma bakamatsutake	QLOL01003175.1	100	44	0	0	29135	29178	1413	1370	2.29e-12
Tricholoma bakamatsutake	QLOL01033719.1	100	44	0	0	69741	69784	1596	1639	2.29e-12
Tricholoma bakamatsutake	QLOL01017467.1	95.455	44	2	0	50802	50845	143	100	4.95e-09
Tricholoma bakamatsutake	QLOL01000755.1	93.182	44	2	1	84961	85004	43325	43367	8.29e-07
Tricholoma bakamatsutake	QLOL01046804.1	100	45	0	0	53659	53703	4419	4375	6.36e-13
Tricholoma bakamatsutake	QLOL01014955.1	97.778	45	1	0	30582	30626	10754	10798	2.96e-11
Tricholoma bakamatsutake	QLOL01044120.1	95.556	45	2	0	50801	50845	1522	1478	1.38e-09
Tricholoma bakamatsutake	QLOL01045753.1	100	48	0	0	79208	79255	1420	1467	1.37e-14
Tricholoma bakamatsutake	QLOL01004111.1	100	48	0	0	43350	43397	1111	1064	1.37e-14
Tricholoma bakamatsutake	QLOL01012888.1	93.878	49	3	0	71036	71084	8727	8679	3.83e-10
Tricholoma bakamatsutake	QLOL01016210.1	91.837	49	3	1	67384	67432	5301	5254	6.41e-08
Tricholoma bakamatsutake	QLOL01002952.1	100	50	0	0	41873	41922	4072	4023	1.06e-15
Tricholoma bakamatsutake	QLOL01001226.1	100	50	0	0	91268	91317	29407	29358	1.06e-15
Tricholoma bakamatsutake	QLOL01034151.1	96.078	51	2	0	50805	50855	1237	1187	6.36e-13
Tricholoma bakamatsutake	QLOL01051044.1	90.385	52	4	1	57776	57827	210	260	6.41e-08
Tricholoma bakamatsutake	QLOL01045617.1	92.308	52	4	0	24329	24380	4545	4494	3.83e-10
Tricholoma bakamatsutake	QLOL01008696.1	100	53	0	0	56408	56460	2904	2852	2.27e-17
Tricholoma bakamatsutake	QLOL01003175.1	96.226	53	1	1	5350	5401	1761	1709	1.77e-13
Tricholoma bakamatsutake	QLOL01026767.1	94.34	53	3	0	50801	50853	581	529	2.29e-12
Tricholoma bakamatsutake	QLOL01030571.1	98.148	54	1	0	63899	63952	397	344	2.94e-16
Tricholoma bakamatsutake	QLOL01020390.1	98.148	54	1	0	63899	63952	3060	3007	2.94e-16
Tricholoma bakamatsutake	QLOL01021370.1	96.364	55	2	0	50801	50855	661	715	3.8e-15
Tricholoma bakamatsutake	QLOL01008073.1	96.429	56	2	0	50801	50856	2388	2333	1.06e-15
Tricholoma bakamatsutake	QLOL01009018.1	94.643	56	3	0	50802	50857	1683	1738	4.92e-14
Tricholoma bakamatsutake	QLOL01005217.1	94.643	56	3	0	50805	50860	17759	17704	4.92e-14
Tricholoma bakamatsutake	QLOL01001305.1	94.643	56	3	0	50802	50857	11059	11114	4.92e-14
Tricholoma bakamatsutake	QLOL01049027.1	98.246	57	1	0	41878	41934	1073	1129	6.32e-18
Tricholoma bakamatsutake	QLOL01008380.1	98.246	57	1	0	50801	50857	1493	1549	6.32e-18
Tricholoma bakamatsutake	QLOL01003768.1	98.246	57	1	0	50801	50857	10682	10738	6.32e-18
Tricholoma bakamatsutake	QLOL01044125.1	98.246	57	0	1	50801	50857	2363	2418	2.27e-17
Tricholoma bakamatsutake	QLOL01044755.1	96.491	57	2	0	50801	50857	773	829	2.94e-16
Tricholoma bakamatsutake	QLOL01043910.1	96.491	57	2	0	50801	50857	2944	3000	2.94e-16
Tricholoma bakamatsutake	QLOL01036270.1	96.491	57	2	0	50801	50857	6305	6361	2.94e-16
Tricholoma bakamatsutake	QLOL01034887.1	96.491	57	2	0	50801	50857	1862	1918	2.94e-16
Tricholoma bakamatsutake	QLOL01029802.1	96.491	57	2	0	50801	50857	273	329	2.94e-16
Tricholoma bakamatsutake	QLOL01029286.1	96.491	57	2	0	50801	50857	604	660	2.94e-16
Tricholoma bakamatsutake	QLOL01028439.1	96.491	57	2	0	50801	50857	109	165	2.94e-16
Tricholoma bakamatsutake	QLOL01027981.1	96.491	57	2	0	50801	50857	286	342	2.94e-16
Tricholoma bakamatsutake	QLOL01023492.1	96.491	57	2	0	50801	50857	485	541	2.94e-16
Tricholoma bakamatsutake	QLOL01019454.1	96.491	57	2	0	50801	50857	1648	1704	2.94e-16
Tricholoma bakamatsutake	QLOL01018558.1	96.491	57	2	0	50801	50857	242	298	2.94e-16
Tricholoma bakamatsutake	QLOL01017223.1	96.491	57	2	0	50801	50857	855	911	2.94e-16
Tricholoma bakamatsutake	QLOL01013824.1	96.491	57	2	0	50801	50857	1008	1064	2.94e-16
Tricholoma bakamatsutake	QLOL01013560.1	96.491	57	2	0	50801	50857	3463	3519	2.94e-16
Tricholoma bakamatsutake	QLOL01013386.1	96.491	57	2	0	50801	50857	2420	2476	2.94e-16
Tricholoma bakamatsutake	QLOL01012556.1	96.491	57	2	0	50801	50857	559	615	2.94e-16
Tricholoma bakamatsutake	QLOL01012013.1	96.491	57	2	0	50801	50857	416	472	2.94e-16
Tricholoma bakamatsutake	QLOL01011127.1	96.491	57	2	0	50801	50857	2940	2996	2.94e-16
Tricholoma bakamatsutake	QLOL01010554.1	96.491	57	2	0	50801	50857	225	281	2.94e-16
Tricholoma bakamatsutake	QLOL01009436.1	96.491	57	2	0	50801	50857	1833	1889	2.94e-16
Tricholoma bakamatsutake	QLOL01007295.1	96.491	57	2	0	50801	50857	7862	7918	2.94e-16
Tricholoma bakamatsutake	QLOL01007120.1	96.491	57	2	0	50801	50857	4369	4425	2.94e-16
Tricholoma bakamatsutake	QLOL01006980.1	96.491	57	2	0	50801	50857	1597	1653	2.94e-16
Tricholoma bakamatsutake	QLOL01006729.1	96.491	57	2	0	50801	50857	9367	9423	2.94e-16
Tricholoma bakamatsutake	QLOL01005805.1	96.491	57	2	0	50801	50857	661	717	2.94e-16
Tricholoma bakamatsutake	QLOL01005573.1	96.491	57	2	0	50801	50857	459	515	2.94e-16
Tricholoma bakamatsutake	QLOL01005242.1	96.491	57	2	0	50801	50857	3955	4011	2.94e-16
Tricholoma bakamatsutake	QLOL01004469.1	96.491	57	2	0	50801	50857	41959	42015	2.94e-16
Tricholoma bakamatsutake	QLOL01003811.1	96.491	57	2	0	50801	50857	4691	4747	2.94e-16
Tricholoma bakamatsutake	QLOL01003568.1	96.491	57	2	0	50801	50857	11030	11086	2.94e-16
Tricholoma bakamatsutake	QLOL01002891.1	96.491	57	2	0	50801	50857	574	630	2.94e-16
Tricholoma bakamatsutake	QLOL01002890.1	96.491	57	2	0	50801	50857	574	630	2.94e-16
Tricholoma bakamatsutake	QLOL01002866.1	96.491	57	2	0	50801	50857	2078	2134	2.94e-16
Tricholoma bakamatsutake	QLOL01001797.1	96.491	57	2	0	50801	50857	1666	1722	2.94e-16
Tricholoma bakamatsutake	QLOL01001345.1	96.491	57	2	0	50801	50857	6097	6153	2.94e-16
Tricholoma bakamatsutake	QLOL01000675.1	96.491	57	2	0	50801	50857	2354	2410	2.94e-16
Tricholoma bakamatsutake	QLOL01045136.1	94.737	57	3	0	50801	50857	4836	4892	1.37e-14
Tricholoma bakamatsutake	QLOL01044946.1	94.737	57	3	0	50801	50857	5178	5234	1.37e-14
Tricholoma bakamatsutake	QLOL01035830.1	94.737	57	3	0	50801	50857	87	143	1.37e-14
Tricholoma bakamatsutake	QLOL01026539.1	94.737	57	3	0	50801	50857	86	142	1.37e-14
Tricholoma bakamatsutake	QLOL01024769.1	94.737	57	3	0	50804	50860	1285	1229	1.37e-14
Tricholoma bakamatsutake	QLOL01019733.1	94.737	57	3	0	50801	50857	1953	2009	1.37e-14
Tricholoma bakamatsutake	QLOL01018104.1	94.737	57	3	0	50801	50857	603	659	1.37e-14
Tricholoma bakamatsutake	QLOL01017224.1	94.737	57	3	0	50801	50857	1287	1343	1.37e-14
Tricholoma bakamatsutake	QLOL01011982.1	94.737	57	3	0	50801	50857	8170	8226	1.37e-14
Tricholoma bakamatsutake	QLOL01008377.1	94.737	57	3	0	50801	50857	842	898	1.37e-14
Tricholoma bakamatsutake	QLOL01008185.1	94.737	57	3	0	50801	50857	1977	2033	1.37e-14
Tricholoma bakamatsutake	QLOL01007408.1	94.737	57	3	0	50801	50857	13675	13619	1.37e-14
Tricholoma bakamatsutake	QLOL01004935.1	94.737	57	3	0	50801	50857	6661	6717	1.37e-14
Tricholoma bakamatsutake	QLOL01002872.1	94.737	57	3	0	50801	50857	6256	6312	1.37e-14
Tricholoma bakamatsutake	QLOL01001934.1	94.737	57	3	0	50801	50857	5048	5104	1.37e-14
Tricholoma bakamatsutake	QLOL01001811.1	94.737	57	3	0	50801	50857	900	956	1.37e-14
Tricholoma bakamatsutake	QLOL01001600.1	94.737	57	3	0	50801	50857	29926	29982	1.37e-14
Tricholoma bakamatsutake	QLOL01001478.1	94.737	57	3	0	50801	50857	31575	31631	1.37e-14
Tricholoma bakamatsutake	QLOL01036066.1	92.982	57	4	0	50801	50857	713	769	6.36e-13
Tricholoma bakamatsutake	QLOL01033381.1	92.982	57	4	0	50801	50857	1158	1214	6.36e-13
Tricholoma bakamatsutake	QLOL01022785.1	92.982	57	4	0	50801	50857	666	722	6.36e-13
Tricholoma bakamatsutake	QLOL01014165.1	92.982	57	4	0	50801	50857	917	973	6.36e-13
Tricholoma bakamatsutake	QLOL01009681.1	92.982	57	4	0	50801	50857	50	106	6.36e-13
Tricholoma bakamatsutake	QLOL01005483.1	92.982	57	4	0	50801	50857	793	849	6.36e-13
Tricholoma bakamatsutake	QLOL01001093.1	92.982	57	4	0	50801	50857	2152	2208	6.36e-13
Tricholoma bakamatsutake	QLOL01000445.1	92.982	57	4	0	50801	50857	10271	10327	6.36e-13
Tricholoma bakamatsutake	QLOL01000362.1	92.982	57	4	0	50801	50857	1086	1142	6.36e-13
Tricholoma bakamatsutake	QLOL01000123.1	92.982	57	4	0	50801	50857	1562	1618	6.36e-13
Tricholoma bakamatsutake	QLOL01008526.1	91.228	57	5	0	50801	50857	2092	2148	2.96e-11
Tricholoma bakamatsutake	QLOL01020867.1	98.276	58	1	0	89757	89814	15964	15907	1.76e-18
Tricholoma bakamatsutake	QLOL01044732.1	94.828	58	1	2	50801	50857	715	771	1.37e-14
Tricholoma bakamatsutake	QLOL01007952.1	94.828	58	1	2	50801	50857	2475	2531	1.37e-14
Tricholoma bakamatsutake	QLOL01007660.1	93.103	58	4	0	50803	50860	341	284	1.77e-13
Tricholoma bakamatsutake	QLOL01018050.1	93.103	58	3	1	50801	50858	773	829	6.36e-13
Tricholoma bakamatsutake	QLOL01011274.1	93.103	58	2	2	50801	50858	11595	11650	6.36e-13
Tricholoma bakamatsutake	QLOL01009498.1	94.915	59	3	0	50801	50859	4922	4864	1.06e-15
Tricholoma bakamatsutake	QLOL01003959.1	90	60	5	1	57776	57835	42151	42093	1.06e-10
Tricholoma bakamatsutake	QLOL01029724.1	96.667	60	2	0	50801	50860	293	234	6.32e-18
Tricholoma bakamatsutake	QLOL01019515.1	96.667	60	2	0	50801	50860	490	549	6.32e-18
Tricholoma bakamatsutake	QLOL01019461.1	96.667	60	2	0	50801	50860	144	85	6.32e-18
Tricholoma bakamatsutake	QLOL01005383.1	96.667	60	2	0	50801	50860	793	852	6.32e-18
Tricholoma bakamatsutake	QLOL01003961.1	96.667	60	2	0	50801	50860	8993	8934	6.32e-18
Tricholoma bakamatsutake	QLOL01000998.1	96.667	60	2	0	50801	50860	3689	3630	6.32e-18
Tricholoma bakamatsutake	QLOL01044594.1	95	60	3	0	50801	50860	1766	1707	2.94e-16
Tricholoma bakamatsutake	QLOL01044577.1	95	60	3	0	50801	50860	431	372	2.94e-16
Tricholoma bakamatsutake	QLOL01044027.1	95	60	3	0	50801	50860	22872	22813	2.94e-16
Tricholoma bakamatsutake	QLOL01043608.1	95	60	3	0	50801	50860	5192	5133	2.94e-16
Tricholoma bakamatsutake	QLOL01043465.1	95	60	3	0	50801	50860	253	194	2.94e-16
Tricholoma bakamatsutake	QLOL01036697.1	95	60	3	0	50801	50860	210	151	2.94e-16
Tricholoma bakamatsutake	QLOL01035635.1	95	60	3	0	50801	50860	394	335	2.94e-16
Tricholoma bakamatsutake	QLOL01034372.1	95	60	3	0	50801	50860	510	569	2.94e-16
Tricholoma bakamatsutake	QLOL01033953.1	95	60	3	0	50801	50860	129	70	2.94e-16
Tricholoma bakamatsutake	QLOL01029990.1	95	60	3	0	50801	50860	438	379	2.94e-16
Tricholoma bakamatsutake	QLOL01026930.1	95	60	3	0	50801	50860	1730	1671	2.94e-16
Tricholoma bakamatsutake	QLOL01020170.1	95	60	3	0	50801	50860	930	871	2.94e-16
Tricholoma bakamatsutake	QLOL01019812.1	95	60	3	0	50801	50860	872	813	2.94e-16
Tricholoma bakamatsutake	QLOL01017924.1	95	60	3	0	50801	50860	1656	1597	2.94e-16
Tricholoma bakamatsutake	QLOL01017575.1	95	60	3	0	50801	50860	283	224	2.94e-16
Tricholoma bakamatsutake	QLOL01017099.1	95	60	3	0	50801	50860	713	654	2.94e-16
Tricholoma bakamatsutake	QLOL01015663.1	95	60	3	0	50801	50860	428	369	2.94e-16
Tricholoma bakamatsutake	QLOL01014072.1	95	60	3	0	50801	50860	3934	3875	2.94e-16
Tricholoma bakamatsutake	QLOL01014000.1	95	60	3	0	50801	50860	4510	4569	2.94e-16
Tricholoma bakamatsutake	QLOL01012694.1	95	60	3	0	50801	50860	7691	7632	2.94e-16
Tricholoma bakamatsutake	QLOL01012336.1	95	60	3	0	50801	50860	1457	1398	2.94e-16
Tricholoma bakamatsutake	QLOL01011899.1	95	60	3	0	50801	50860	5198	5139	2.94e-16
Tricholoma bakamatsutake	QLOL01011786.1	95	60	3	0	50801	50860	3189	3130	2.94e-16
Tricholoma bakamatsutake	QLOL01011087.1	95	60	3	0	50801	50860	5103	5044	2.94e-16
Tricholoma bakamatsutake	QLOL01011059.1	95	60	3	0	50801	50860	233	174	2.94e-16
Tricholoma bakamatsutake	QLOL01008849.1	95	60	3	0	50801	50860	1620	1561	2.94e-16
Tricholoma bakamatsutake	QLOL01008587.1	95	60	3	0	50801	50860	6440	6381	2.94e-16
Tricholoma bakamatsutake	QLOL01008058.1	95	60	3	0	50801	50860	16944	16885	2.94e-16
Tricholoma bakamatsutake	QLOL01006533.1	95	60	3	0	50801	50860	881	822	2.94e-16
Tricholoma bakamatsutake	QLOL01005729.1	95	60	3	0	50801	50860	326	267	2.94e-16
Tricholoma bakamatsutake	QLOL01004816.1	95	60	3	0	50801	50860	305	364	2.94e-16
Tricholoma bakamatsutake	QLOL01003914.1	95	60	3	0	50801	50860	7675	7616	2.94e-16
Tricholoma bakamatsutake	QLOL01003767.1	95	60	3	0	50801	50860	477	418	2.94e-16
Tricholoma bakamatsutake	QLOL01003365.1	95	60	3	0	50801	50860	5000	4941	2.94e-16
Tricholoma bakamatsutake	QLOL01002434.1	95	60	3	0	50801	50860	1403	1344	2.94e-16
Tricholoma bakamatsutake	QLOL01002292.1	95	60	3	0	50801	50860	3131	3072	2.94e-16
Tricholoma bakamatsutake	QLOL01002281.1	95	60	3	0	50801	50860	2518	2459	2.94e-16
Tricholoma bakamatsutake	QLOL01001566.1	95	60	3	0	50801	50860	774	715	2.94e-16
Tricholoma bakamatsutake	QLOL01001504.1	95	60	3	0	50801	50860	1974	1915	2.94e-16
Tricholoma bakamatsutake	QLOL01001459.1	95	60	3	0	50801	50860	2122	2063	2.94e-16
Tricholoma bakamatsutake	QLOL01000698.1	95	60	3	0	50801	50860	4355	4296	2.94e-16
Tricholoma bakamatsutake	QLOL01000368.1	95	60	3	0	50801	50860	9698	9639	2.94e-16
Tricholoma bakamatsutake	QLOL01046765.1	93.333	60	4	0	50801	50860	12651	12592	1.37e-14
Tricholoma bakamatsutake	QLOL01045660.1	93.333	60	4	0	50801	50860	1264	1205	1.37e-14
Tricholoma bakamatsutake	QLOL01044460.1	93.333	60	4	0	50801	50860	9880	9821	1.37e-14
Tricholoma bakamatsutake	QLOL01043422.1	93.333	60	4	0	50801	50860	70	11	1.37e-14
Tricholoma bakamatsutake	QLOL01043302.1	93.333	60	4	0	50801	50860	313	254	1.37e-14
Tricholoma bakamatsutake	QLOL01037956.1	93.333	60	4	0	50801	50860	992	933	1.37e-14
Tricholoma bakamatsutake	QLOL01023006.1	93.333	60	4	0	50801	50860	5050	4991	1.37e-14
Tricholoma bakamatsutake	QLOL01022146.1	93.333	60	4	0	50801	50860	6842	6783	1.37e-14
Tricholoma bakamatsutake	QLOL01021528.1	93.333	60	4	0	50801	50860	236	177	1.37e-14
Tricholoma bakamatsutake	QLOL01020288.1	93.333	60	4	0	50801	50860	340	281	1.37e-14
Tricholoma bakamatsutake	QLOL01019035.1	93.333	60	4	0	50801	50860	230	171	1.37e-14
Tricholoma bakamatsutake	QLOL01017648.1	93.333	60	4	0	50801	50860	5481	5422	1.37e-14
Tricholoma bakamatsutake	QLOL01012659.1	93.333	60	4	0	50801	50860	1361	1302	1.37e-14
Tricholoma bakamatsutake	QLOL01010001.1	93.333	60	4	0	50801	50860	17589	17530	1.37e-14
Tricholoma bakamatsutake	QLOL01009196.1	93.333	60	4	0	50801	50860	425	366	1.37e-14
Tricholoma bakamatsutake	QLOL01008941.1	93.333	60	4	0	50801	50860	8165	8106	1.37e-14
Tricholoma bakamatsutake	QLOL01006121.1	93.333	60	4	0	50801	50860	12379	12320	1.37e-14
Tricholoma bakamatsutake	QLOL01004969.1	93.333	60	4	0	50801	50860	6548	6489	1.37e-14
Tricholoma bakamatsutake	QLOL01003889.1	93.333	60	4	0	50801	50860	614	555	1.37e-14
Tricholoma bakamatsutake	QLOL01001201.1	93.333	60	4	0	50801	50860	103	44	1.37e-14
Tricholoma bakamatsutake	QLOL01000956.1	93.333	60	4	0	50801	50860	3101	3042	1.37e-14
Tricholoma bakamatsutake	QLOL01000865.1	93.333	60	4	0	50801	50860	1332	1391	1.37e-14
Tricholoma bakamatsutake	QLOL01000415.1	93.333	60	4	0	50801	50860	1470	1411	1.37e-14
Tricholoma bakamatsutake	QLOL01049480.1	91.667	60	5	0	50801	50860	64	5	6.36e-13
Tricholoma bakamatsutake	QLOL01035044.1	91.667	60	5	0	50801	50860	146	87	6.36e-13
Tricholoma bakamatsutake	QLOL01034512.1	91.667	60	5	0	50801	50860	364	305	6.36e-13
Tricholoma bakamatsutake	QLOL01007680.1	91.667	60	5	0	50801	50860	36627	36568	6.36e-13
Tricholoma bakamatsutake	QLOL01005483.1	91.667	60	5	0	50801	50860	13731	13672	6.36e-13
Tricholoma bakamatsutake	QLOL01000666.1	91.667	60	5	0	50801	50860	4615	4556	6.36e-13
Tricholoma bakamatsutake	QLOL01007744.1	96.721	61	2	0	80558	80618	1	61	1.76e-18
Tricholoma bakamatsutake	QLOL01003175.1	95.082	61	3	0	13456	13516	1678	1618	8.17e-17
Tricholoma bakamatsutake	QLOL01043863.1	90.164	61	2	1	50801	50857	32	92	1.06e-10
Tricholoma bakamatsutake	QLOL01051002.1	95.313	64	1	2	51677	51738	67	4	6.32e-18
Tricholoma bakamatsutake	QLOL01008191.1	100	65	0	0	1485	1549	121	57	4.85e-24
Tricholoma bakamatsutake	QLOL01035157.1	92.424	66	4	1	50801	50865	84	19	1.06e-15
Tricholoma bakamatsutake	QLOL01044602.1	97.015	67	2	0	100607	100673	9022	8956	8.11e-22
Tricholoma bakamatsutake	QLOL01043589.1	95.775	71	2	1	51211	51281	23597	23528	8.11e-22
Tricholoma bakamatsutake	QLOL01010874.1	100	74	0	0	56776	56849	10553	10480	4.81e-29
Tricholoma bakamatsutake	QLOL01044665.1	100	76	0	0	50724	50799	3169	3094	3.72e-30
Tricholoma bakamatsutake	QLOL01050312.1	90.909	77	7	0	40871	40947	1793	1717	4.88e-19
Tricholoma bakamatsutake	QLOL01008758.1	100	77	0	0	50723	50799	7204	7128	1.03e-30
Tricholoma bakamatsutake	QLOL01001838.1	96.154	78	1	1	57869	57946	670	595	1.04e-25
Tricholoma bakamatsutake	QLOL01034947.1	96.203	79	3	0	49245	49323	6106	6184	8.06e-27
Tricholoma bakamatsutake	QLOL01050407.1	90	80	8	0	7624	7703	5554	5633	4.88e-19
Tricholoma bakamatsutake	QLOL01044955.1	98.795	83	1	0	96793	96875	3467	3549	2.22e-32
Tricholoma bakamatsutake	QLOL01021112.1	96.552	87	3	0	15700	15786	5045	5131	2.88e-31
Tricholoma bakamatsutake	QLOL01035338.1	100	90	0	0	20915	21004	1992	2081	6.14e-38
Tricholoma bakamatsutake	QLOL01044000.1	95.652	92	4	0	23472	23563	1250	1341	2.22e-32
Tricholoma bakamatsutake	QLOL01007252.1	98.969	97	1	0	23532	23628	7046	6950	3.67e-40
Tricholoma bakamatsutake	QLOL01044630.1	97	100	3	0	91195	91294	13788	13887	1.71e-38
Tricholoma bakamatsutake	QLOL01034947.1	97.059	102	3	0	77326	77427	5968	5867	1.32e-39
Tricholoma bakamatsutake	QLOL01024310.1	100	104	0	0	75861	75964	47	150	1.01e-45
Tricholoma bakamatsutake	QLOL01017531.1	100	106	0	0	98133	98238	5167	5272	7.83e-47
Tricholoma bakamatsutake	QLOL01050111.1	89.381	113	11	1	13449	13560	113	1	3.72e-30
Tricholoma bakamatsutake	QLOL01010992.1	99.115	113	1	0	97298	97410	660	772	4.68e-49
Tricholoma bakamatsutake	QLOL01044365.1	96.581	117	4	0	43926	44042	7727	7843	2.82e-46
Tricholoma bakamatsutake	QLOL01044293.1	96.581	117	4	0	43926	44042	4098	4214	2.82e-46
Tricholoma bakamatsutake	QLOL01046191.1	95.763	118	4	1	43925	44042	1321	1205	1.31e-44
Tricholoma bakamatsutake	QLOL01007743.1	94.118	119	4	3	71248	71365	5	121	2.84e-41
Tricholoma bakamatsutake	QLOL01050312.1	83.607	122	17	3	39472	39593	1834	1716	2.92e-21
Tricholoma bakamatsutake	QLOL01050407.1	83.2	125	18	3	7583	7704	4155	4279	2.92e-21
Tricholoma bakamatsutake	QLOL01001181.1	84.8	125	15	4	30614	30735	1211	1334	1.35e-24
Tricholoma bakamatsutake	QLOL01022627.1	99.213	127	0	1	20878	21004	823	698	2.78e-56
Tricholoma bakamatsutake	QLOL01003959.1	93.893	131	4	1	66459	66589	42192	42066	2.82e-46
Tricholoma bakamatsutake	QLOL01004435.1	96.97	132	3	1	17772	17903	12805	12935	4.65e-54
Tricholoma bakamatsutake	QLOL01049075.1	85.821	134	9	10	94947	95071	324	456	6.23e-28
Tricholoma bakamatsutake	QLOL01008829.1	94.074	135	6	2	6208	6341	281	414	4.68e-49
Tricholoma bakamatsutake	QLOL01026053.1	97.037	135	3	1	24054	24187	3027	3161	9.99e-56
Tricholoma bakamatsutake	QLOL01002053.1	96.296	135	5	0	1666	1800	768	634	1.29e-54
Tricholoma bakamatsutake	QLOL01036644.1	78.986	138	25	4	47111	47246	142	7	3.8e-15
Tricholoma bakamatsutake	QLOL01005570.1	89.209	139	7	3	52710	52848	2696	2826	6.14e-38
Tricholoma bakamatsutake	QLOL01000216.1	83.688	141	17	6	88774	88910	3428	3566	2.9e-26
Tricholoma bakamatsutake	QLOL01049886.1	85.915	142	17	2	95720	95860	58	197	2.22e-32
Tricholoma bakamatsutake	QLOL01000026.1	100	143	0	0	95874	96016	13097	12955	2.12e-67
Tricholoma bakamatsutake	QLOL01046804.1	91.096	146	4	3	15749	15893	4549	4412	1.31e-44
Tricholoma bakamatsutake	QLOL01002952.1	100	154	0	0	67116	67269	4156	4309	1.62e-73
Tricholoma bakamatsutake	QLOL01001181.1	83.626	171	19	6	30272	30433	952	1122	1.72e-33
Tricholoma bakamatsutake	QLOL01038141.1	91.713	181	15	0	77290	77470	605	785	1.65e-63
Tricholoma bakamatsutake	QLOL01029873.1	97.814	183	3	1	80585	80766	5737	5919	2.07e-82
Tricholoma bakamatsutake	QLOL01047978.1	95.699	186	8	0	6256	6441	1	186	5.8e-78
Tricholoma bakamatsutake	QLOL01008829.1	91.489	188	6	1	39948	40135	220	43	5.93e-63
Tricholoma bakamatsutake	QLOL01002967.1	98.507	201	3	0	16686	16886	99	299	1.22e-94
Tricholoma bakamatsutake	QLOL01001181.1	85.167	209	16	7	30001	30194	603	811	6.05e-48
Tricholoma bakamatsutake	QLOL01050550.1	100	219	0	0	23358	23576	219	1	1.2e-109
Tricholoma bakamatsutake	QLOL01050682.1	100	222	0	0	102591	102812	1	222	2.57e-111
Tricholoma bakamatsutake	QLOL01007743.1	85.841	226	20	9	73835	74057	976	1192	7.72e-57
Tricholoma bakamatsutake	QLOL01049018.1	81.277	235	20	11	99611	99825	487	717	1.71e-38
Tricholoma bakamatsutake	QLOL01050111.1	100	244	0	0	23604	23847	244	1	1.51e-123
Tricholoma bakamatsutake	QLOL01049370.1	85.49	255	26	10	96069	96317	1	250	1.27e-64
Tricholoma bakamatsutake	QLOL01046689.1	100	259	0	0	86814	87072	259	1	6.94e-132
Tricholoma bakamatsutake	QLOL01044000.1	92.664	259	11	3	22942	23192	947	1205	5.64e-98
Tricholoma bakamatsutake	QLOL01007743.1	89.591	269	27	1	78258	78525	2015	2283	3.42e-90
Tricholoma bakamatsutake	QLOL01007743.1	80.669	269	40	8	75431	75699	1270	1526	2.18e-47
Tricholoma bakamatsutake	QLOL01049064.1	100	284	0	0	34496	34779	284	1	8.79e-146
Tricholoma bakamatsutake	QLOL01031622.1	90.099	303	21	1	6032	6334	349	642	1.56e-103
Tricholoma bakamatsutake	QLOL01003983.1	79.479	307	57	6	27639	27942	74	377	7.78e-52
Tricholoma bakamatsutake	QLOL01049115.1	100	317	0	0	66898	67214	1	317	3.98e-164
Tricholoma bakamatsutake	QLOL01038141.1	81.493	335	48	11	75365	75699	285	605	7.61e-67
Tricholoma bakamatsutake	QLOL01049971.1	81.899	337	41	11	23735	24070	2925	2608	5.89e-68
Tricholoma bakamatsutake	QLOL01003959.1	94.857	350	15	3	67397	67746	42067	41721	2.43e-151
Tricholoma bakamatsutake	QLOL01007047.1	81.766	351	62	2	52167	52516	1142	1491	9.71e-76
Tricholoma bakamatsutake	QLOL01051269.1	100	361	0	0	63448	63808	1	361	0
Tricholoma bakamatsutake	QLOL01049820.1	100	361	0	0	9541	9901	361	1	0
Tricholoma bakamatsutake	QLOL01049586.1	100	361	0	0	16416	16776	361	1	0
Tricholoma bakamatsutake	QLOL01050377.1	99.73	371	1	0	95521	95891	371	1	0
Tricholoma bakamatsutake	QLOL01050090.1	100	373	0	0	98187	98559	1	373	0
Tricholoma bakamatsutake	QLOL01007743.1	85.677	384	48	6	77290	77672	1526	1903	2e-107
Tricholoma bakamatsutake	QLOL01049755.1	100	398	0	0	83454	83851	1	398	0
Tricholoma bakamatsutake	QLOL01048960.1	100	448	0	0	57141	57588	1	448	0
Tricholoma bakamatsutake	QLOL01049193.1	100	460	0	0	70026	70485	460	1	0
Tricholoma bakamatsutake	QLOL01049575.1	100	461	0	0	95979	96439	461	1	0
Tricholoma bakamatsutake	QLOL01051242.1	100	480	0	0	79848	80327	1	480	0
Tricholoma bakamatsutake	QLOL01050492.1	100	491	0	0	31390	31880	491	1	0
Tricholoma bakamatsutake	QLOL01049687.1	100	498	0	0	60694	61191	1	498	0
Tricholoma bakamatsutake	QLOL01049016.1	100	501	0	0	32538	33038	501	1	0
Tricholoma bakamatsutake	QLOL01050786.1	100	514	0	0	88766	89279	514	1	0
Tricholoma bakamatsutake	QLOL01051044.1	100	521	0	0	66291	66811	1	521	0
Tricholoma bakamatsutake	QLOL01049708.1	100	555	0	0	98685	99239	1	555	0
Tricholoma bakamatsutake	QLOL01049420.1	100	555	0	0	31983	32537	555	1	0
Tricholoma bakamatsutake	QLOL01050678.1	100	570	0	0	11142	11711	570	1	0
Tricholoma bakamatsutake	QLOL01051083.1	100	583	0	0	97593	98175	1	583	0
Tricholoma bakamatsutake	QLOL01050955.1	100	600	0	0	33039	33638	600	1	0
Tricholoma bakamatsutake	QLOL01049852.1	100	609	0	0	82793	83401	1	609	0
Tricholoma bakamatsutake	QLOL01051220.1	100	615	0	0	67220	67834	1	615	0
Tricholoma bakamatsutake	QLOL01050582.1	100	674	0	0	33823	34496	1	674	0
Tricholoma bakamatsutake	QLOL01049519.1	100	709	0	0	11826	12534	709	1	0
Tricholoma bakamatsutake	QLOL01050042.1	100	748	0	0	99240	99987	1	748	0
Tricholoma bakamatsutake	QLOL01049941.1	100	761	0	0	61192	61952	1	761	0
Tricholoma bakamatsutake	QLOL01049144.1	100	785	0	0	50992	51776	785	1	0
Tricholoma bakamatsutake	QLOL01049074.1	100	800	0	0	101602	102401	1	800	0
Tricholoma bakamatsutake	QLOL01050290.1	100	876	0	0	75023	75898	1	876	0
Tricholoma bakamatsutake	QLOL01050869.1	100	963	0	0	21152	22114	963	1	0
Tricholoma bakamatsutake	QLOL01049148.1	100	963	0	0	10029	10991	963	1	0
Tricholoma bakamatsutake	QLOL01021802.1	77.349	1011	190	30	57832	58819	2406	1412	6.7e-157
Tricholoma bakamatsutake	QLOL01049082.1	100	1015	0	0	22221	23235	1015	1	0
Tricholoma bakamatsutake	QLOL01049235.1	100	1024	0	0	49740	50763	1	1024	0
Tricholoma bakamatsutake	QLOL01049692.1	100	1044	0	0	96536	97579	1	1044	0
Tricholoma bakamatsutake	QLOL01018865.1	95.411	1046	27	7	1431	2475	3354	2329	0
Tricholoma bakamatsutake	QLOL01049023.1	99.905	1056	1	0	18589	19644	1056	1	0
Tricholoma bakamatsutake	QLOL01049392.1	100	1083	0	0	73762	74844	1	1083	0
Tricholoma bakamatsutake	QLOL01050254.1	100	1091	0	0	81642	82732	1	1091	0
Tricholoma bakamatsutake	QLOL01050909.1	100	1109	0	0	45161	46269	1109	1	0
Tricholoma bakamatsutake	QLOL01050634.1	100	1148	0	0	1846	2993	1148	1	0
Tricholoma bakamatsutake	QLOL01050830.1	100	1157	0	0	80432	81588	1	1157	0
Tricholoma bakamatsutake	QLOL01049085.1	100	1191	0	0	46386	47576	1191	1	0
Tricholoma bakamatsutake	QLOL01050169.1	100	1215	0	0	19706	20920	1	1215	0
Tricholoma bakamatsutake	QLOL01051050.1	100	1228	0	0	51873	53100	1228	1	0
Tricholoma bakamatsutake	QLOL01049360.1	100	1248	0	0	23963	25210	1248	1	0
Tricholoma bakamatsutake	QLOL01050397.1	100	1316	0	0	87092	88407	1316	1	0
Tricholoma bakamatsutake	QLOL01051086.1	100	1323	0	0	53284	54606	1	1323	0
Tricholoma bakamatsutake	QLOL01051030.1	100	1361	0	0	70605	71965	1	1361	0
Tricholoma bakamatsutake	QLOL01050922.1	100	1380	0	0	25506	26885	1	1380	0
Tricholoma bakamatsutake	QLOL01049116.1	100	1496	0	0	61953	63448	1	1496	0
Tricholoma bakamatsutake	QLOL01049042.1	100	1518	0	0	76007	77524	1	1518	0
Tricholoma bakamatsutake	QLOL01049824.1	100	1552	0	0	100051	101602	1	1552	0
Tricholoma bakamatsutake	QLOL01049874.1	100	1693	0	0	16859	18551	1693	1	0
Tricholoma bakamatsutake	QLOL01049689.1	100	1717	0	0	1	1717	1717	1	0
Tricholoma bakamatsutake	QLOL01050960.1	100	1755	0	0	72007	73761	1	1755	0
Tricholoma bakamatsutake	QLOL01051179.1	100	1901	0	0	47635	49535	1	1901	0
Tricholoma bakamatsutake	QLOL01049316.1	100	2182	0	0	77632	79813	1	2182	0
Tricholoma bakamatsutake	QLOL01049683.1	100	2191	0	0	67835	70025	2191	1	0
Tricholoma bakamatsutake	QLOL01051074.1	100	2264	0	0	54878	57141	1	2264	0
Tricholoma bakamatsutake	QLOL01049543.1	100	2283	0	0	63809	66091	1	2283	0
Tricholoma bakamatsutake	QLOL01051201.1	100	2375	0	0	57838	60212	1	2375	0
Tricholoma bakamatsutake	QLOL01049351.1	100	2571	0	0	83951	86521	1	2571	0
Tricholoma bakamatsutake	QLOL01049971.1	100	3846	0	0	12528	16373	3846	1	0
Tricholoma bakamatsutake	QLOL01049076.1	100	4206	0	0	26886	31091	4206	1	0
Tricholoma bakamatsutake	QLOL01048980.1	100	5950	0	0	89483	95432	5950	1	0
Tricholoma bakamatsutake	QLOL01050312.1	100	6304	0	0	3116	9419	6304	1	0
Tricholoma bakamatsutake	QLOL01050407.1	100	9849	0	0	35315	45163	1	9849	0
Tricholoma flavovirens	QLOK01043110.1	100	32	0	0	17060	17091	2681	2650	4.36e-06
Tricholoma flavovirens	QLOK01042548.1	100	32	0	0	41187	41218	18617	18586	4.36e-06
Tricholoma flavovirens	QLOK01039485.1	100	33	0	0	46463	46495	33	1	1.21e-06
Tricholoma flavovirens	QLOK01041688.1	100	34	0	0	19762	19795	6374	6341	3.37e-07
Tricholoma flavovirens	QLOK01011635.1	100	35	0	0	2476	2510	2581	2547	9.37e-08
Tricholoma flavovirens	QLOK01004385.1	100	35	0	0	1393	1427	4980	5014	9.37e-08
Tricholoma flavovirens	QLOK01001310.1	100	35	0	0	2476	2510	31865	31899	9.37e-08
Tricholoma flavovirens	QLOK01023613.1	100	36	0	0	2476	2511	1675	1710	2.6e-08
Tricholoma flavovirens	QLOK01007800.1	100	36	0	0	2476	2511	6164	6129	2.6e-08
Tricholoma flavovirens	QLOK01001435.1	100	36	0	0	2476	2511	2831	2866	2.6e-08
Tricholoma flavovirens	QLOK01014917.1	100	37	0	0	41089	41125	4888	4924	7.24e-09
Tricholoma flavovirens	QLOK01031133.1	97.561	41	0	1	2476	2516	30	69	7.24e-09
Tricholoma flavovirens	QLOK01028426.1	97.561	41	0	1	2476	2516	662	701	7.24e-09
Tricholoma flavovirens	QLOK01016683.1	97.561	41	0	1	2476	2516	8196	8235	7.24e-09
Tricholoma flavovirens	QLOK01009940.1	97.561	41	0	1	2476	2516	4044	4083	7.24e-09
Tricholoma flavovirens	QLOK01006355.1	97.561	41	0	1	2476	2516	1877	1916	7.24e-09
Tricholoma flavovirens	QLOK01026695.1	100	44	0	0	18895	18938	564	521	9.3e-13
Tricholoma flavovirens	QLOK01000918.1	95.455	44	1	1	2476	2519	33710	33668	7.24e-09
Tricholoma flavovirens	QLOK01000059.1	95.455	44	1	1	2476	2519	1029	987	7.24e-09
Tricholoma flavovirens	QLOK01004353.1	100	45	0	0	18029	18073	17388	17344	2.59e-13
Tricholoma flavovirens	QLOK01048643.1	97.872	47	1	0	1949	1995	309	355	9.3e-13
Tricholoma flavovirens	QLOK01036067.1	91.667	48	2	2	2476	2523	941	986	9.37e-08
Tricholoma flavovirens	QLOK01017525.1	98	50	1	0	46490	46539	1187	1138	2e-14
Tricholoma flavovirens	QLOK01048965.1	100	53	0	0	18937	18989	1554	1502	9.24e-18
Tricholoma flavovirens	QLOK01047419.1	100	53	0	0	10789	10841	2220	2272	9.24e-18
Tricholoma flavovirens	QLOK01013644.1	96.429	56	0	1	48652	48707	2622	2675	1.55e-15
Tricholoma flavovirens	QLOK01005877.1	100	58	0	0	25443	25500	2505	2562	1.53e-20
Tricholoma flavovirens	QLOK01039104.1	98.276	58	1	0	46463	46520	1028	971	7.14e-19
Tricholoma flavovirens	QLOK01047917.1	96.61	59	1	1	8999	9056	3459	3401	3.32e-17
Tricholoma flavovirens	QLOK01047057.1	96.61	59	1	1	13851	13909	1718	1775	3.32e-17
Tricholoma flavovirens	QLOK01005877.1	100	59	0	0	41699	41757	2184	2126	4.27e-21
Tricholoma flavovirens	QLOK01002604.1	91.935	62	1	2	38286	38343	34500	34439	2.59e-13
Tricholoma flavovirens	QLOK01016776.1	98.507	67	1	0	46396	46462	1549	1483	7.09e-24
Tricholoma flavovirens	QLOK01048643.1	100	70	0	0	36481	36550	311	242	3.28e-27
Tricholoma flavovirens	QLOK01005877.1	100	72	0	0	7951	8022	2465	2394	2.53e-28
Tricholoma flavovirens	QLOK01048994.1	94.444	72	4	0	46468	46539	551	480	1.19e-21
Tricholoma flavovirens	QLOK01001684.1	93.243	74	5	0	46468	46541	6805	6732	4.27e-21
Tricholoma flavovirens	QLOK01005402.1	89.189	74	8	0	46468	46541	1941	2014	4.3e-16
Tricholoma flavovirens	QLOK01001969.1	96.053	76	3	0	46463	46538	76	1	1.52e-25
Tricholoma flavovirens	QLOK01046965.1	92.105	76	6	0	46466	46541	122	47	1.53e-20
Tricholoma flavovirens	QLOK01022644.1	98.701	77	1	0	46463	46539	1086	1162	1.96e-29
Tricholoma flavovirens	QLOK01024280.1	97.403	77	2	0	46463	46539	468	544	9.11e-28
Tricholoma flavovirens	QLOK01023325.1	97.403	77	2	0	46463	46539	1052	1128	9.11e-28
Tricholoma flavovirens	QLOK01046320.1	100	77	0	0	46463	46539	406	482	4.21e-31
Tricholoma flavovirens	QLOK01022457.1	100	77	0	0	46465	46541	4170	4094	4.21e-31
Tricholoma flavovirens	QLOK01043927.1	98.701	77	1	0	46463	46539	187	263	1.96e-29
Tricholoma flavovirens	QLOK01037320.1	98.701	77	1	0	46463	46539	158	234	1.96e-29
Tricholoma flavovirens	QLOK01029734.1	98.701	77	1	0	46463	46539	483	407	1.96e-29
Tricholoma flavovirens	QLOK01023318.1	98.701	77	1	0	46463	46539	65	141	1.96e-29
Tricholoma flavovirens	QLOK01012425.1	98.701	77	1	0	46463	46539	5962	5886	1.96e-29
Tricholoma flavovirens	QLOK01003220.1	98.701	77	1	0	46463	46539	156	80	1.96e-29
Tricholoma flavovirens	QLOK01000717.1	98.701	77	1	0	46463	46539	523	599	1.96e-29
Tricholoma flavovirens	QLOK01044339.1	97.403	77	2	0	46463	46539	106	182	9.11e-28
Tricholoma flavovirens	QLOK01035138.1	97.403	77	2	0	46463	46539	107	183	9.11e-28
Tricholoma flavovirens	QLOK01027121.1	97.403	77	2	0	46463	46539	768	692	9.11e-28
Tricholoma flavovirens	QLOK01004655.1	97.403	77	2	0	46463	46539	13548	13472	9.11e-28
Tricholoma flavovirens	QLOK01001136.1	97.403	77	2	0	46463	46539	912	988	9.11e-28
Tricholoma flavovirens	QLOK01035751.1	96.104	77	2	1	46463	46539	84	9	1.52e-25
Tricholoma flavovirens	QLOK01027444.1	94.805	77	3	1	46463	46539	836	911	7.09e-24
Tricholoma flavovirens	QLOK01000257.1	92.208	77	6	0	46463	46539	2218	2294	4.27e-21
Tricholoma flavovirens	QLOK01004207.1	89.61	77	8	0	46468	46544	10606	10530	9.24e-18
Tricholoma flavovirens	QLOK01017076.1	100	79	0	0	46463	46541	469	547	3.25e-32
Tricholoma flavovirens	QLOK01016776.1	100	79	0	0	46463	46541	1390	1468	3.25e-32
Tricholoma flavovirens	QLOK01005681.1	100	79	0	0	46463	46541	841	763	3.25e-32
Tricholoma flavovirens	QLOK01001116.1	100	79	0	0	18574	18652	5344	5422	3.25e-32
Tricholoma flavovirens	QLOK01026695.1	98.734	79	1	0	10914	10992	486	564	1.51e-30
Tricholoma flavovirens	QLOK01003533.1	98.734	79	1	0	46463	46541	12038	12116	1.51e-30
Tricholoma flavovirens	QLOK01046650.1	97.468	79	2	0	46463	46541	79	157	7.04e-29
Tricholoma flavovirens	QLOK01024522.1	97.468	79	2	0	46463	46541	291	369	7.04e-29
Tricholoma flavovirens	QLOK01005877.1	97.701	87	2	0	44389	44475	2268	2182	2.51e-33
Tricholoma flavovirens	QLOK01048965.1	96.591	88	3	0	18851	18938	1749	1662	3.25e-32
Tricholoma flavovirens	QLOK01047419.1	96.591	88	3	0	10949	11036	2271	2358	3.25e-32
Tricholoma flavovirens	QLOK01022644.1	100	92	0	0	46371	46462	1270	1179	1.93e-39
Tricholoma flavovirens	QLOK01024280.1	98.913	92	1	0	46371	46462	652	561	8.98e-38
Tricholoma flavovirens	QLOK01023325.1	98.913	92	1	0	46371	46462	1236	1145	8.98e-38
Tricholoma flavovirens	QLOK01048387.1	96.739	92	3	0	46371	46462	93	2	1.94e-34
Tricholoma flavovirens	QLOK01029318.1	95.652	92	4	0	46371	46462	118	27	9.04e-33
Tricholoma flavovirens	QLOK01001684.1	92.473	93	6	1	46377	46468	6632	6724	9.11e-28
Tricholoma flavovirens	QLOK01010112.1	91.398	93	7	1	46377	46468	14682	14774	4.24e-26
Tricholoma flavovirens	QLOK01000111.1	95.789	95	3	1	17509	17602	6137	6043	6.99e-34
Tricholoma flavovirens	QLOK01027024.1	92.857	98	7	0	4595	4692	1583	1486	4.21e-31
Tricholoma flavovirens	QLOK01003297.1	92.857	98	7	0	4595	4692	2486	2389	4.21e-31
Tricholoma flavovirens	QLOK01002171.1	92.857	98	7	0	4595	4692	698	601	4.21e-31
Tricholoma flavovirens	QLOK01044181.1	91.837	98	8	0	4595	4692	9584	9487	1.96e-29
Tricholoma flavovirens	QLOK01029441.1	91.837	98	8	0	4595	4692	741	644	1.96e-29
Tricholoma flavovirens	QLOK01048651.1	98.182	110	1	1	26707	26815	1	110	1.48e-45
Tricholoma flavovirens	QLOK01047921.1	98.182	110	1	1	23869	23978	1	109	1.48e-45
Tricholoma flavovirens	QLOK01048651.1	98.333	120	2	0	23740	23859	2710	2829	1.14e-51
Tricholoma flavovirens	QLOK01016026.1	99.451	182	0	1	23566	23747	872	692	3.01e-87
Tricholoma flavovirens	QLOK01047921.1	100	259	0	0	26707	26965	1	259	2.82e-132
Tricholoma flavovirens	QLOK01047670.1	100	317	0	0	12386	12702	1	317	1.62e-164
Tricholoma flavovirens	QLOK01047268.1	100	351	0	0	21208	21558	351	1	0
Tricholoma flavovirens	QLOK01047665.1	100	598	0	0	43529	44126	598	1	0
Tricholoma flavovirens	QLOK01048465.1	100	722	0	0	33406	34127	722	1	0
Tricholoma flavovirens	QLOK01048527.1	100	802	0	0	21600	22401	802	1	0
Tricholoma flavovirens	QLOK01047577.1	100	985	0	0	42419	43403	985	1	0
Tricholoma flavovirens	QLOK01047698.1	100	1166	0	0	22401	23566	1	1166	0
Tricholoma flavovirens	QLOK01049023.1	100	1475	0	0	17346	18820	1475	1	0
Tricholoma flavovirens	QLOK01046764.1	100	1822	0	0	31447	33268	1822	1	0
Tricholoma flavovirens	QLOK01049101.1	100	1952	0	0	44264	46215	1952	1	0
Tricholoma flavovirens	QLOK01047057.1	100	1985	0	0	7282	9266	1	1985	0
Tricholoma flavovirens	QLOK01047419.1	100	2388	0	0	18821	21208	2388	1	0
Tricholoma flavovirens	QLOK01048965.1	100	2751	0	0	9288	12038	1	2751	0
Tricholoma flavovirens	QLOK01048651.1	100	2829	0	0	23869	26697	1	2829	0
Tricholoma flavovirens	QLOK01047144.1	99.966	2942	1	0	46539	49480	81	3022	0
Tricholoma flavovirens	QLOK01046854.1	100	3558	0	0	34127	37684	3558	1	0
Tricholoma flavovirens	QLOK01048211.1	100	4460	0	0	37711	42170	4460	1	0
Tricholoma flavovirens	QLOK01049292.1	100	4481	0	0	26966	31446	1	4481	0
Tricholoma flavovirens	QLOK01047917.1	100	4501	0	0	12809	17309	4501	1	0
Tricholoma flavovirens	QLOK01047144.1	100	7281	0	0	1	7281	3023	10303	0
Tricholoma saponaceum	QLOJ01003180.1	100	40	0	0	11069	11108	1910	1871	1.39e-10
Tricholoma saponaceum	QLOJ01004785.1	93.617	47	3	0	68652	68698	9559	9605	1.8e-09
Tricholoma saponaceum	QLOJ01002024.1	100	54	0	0	81988	82041	8702	8755	2.3e-18
Tricholoma saponaceum	QLOJ01011995.1	94.545	55	2	1	10542	10595	13891	13837	2.31e-13
Tricholoma saponaceum	QLOJ01011995.1	94.545	55	2	1	10596	10650	13945	13892	2.31e-13
Tricholoma saponaceum	QLOJ01011995.1	100	60	0	0	13085	13144	11325	11266	1.06e-21
Tricholoma saponaceum	QLOJ01011995.1	100	60	0	0	13162	13221	11402	11343	1.06e-21
Tricholoma saponaceum	QLOJ01011995.1	95.161	62	3	0	31113	31174	29050	29111	8.26e-18
Tricholoma saponaceum	QLOJ01012658.1	98.438	64	1	0	55764	55827	3651	3588	2.95e-22
Tricholoma saponaceum	QLOJ01012658.1	98.438	64	1	0	35740	35803	26215	26278	2.95e-22
Tricholoma saponaceum	QLOJ01011995.1	95.313	64	3	0	31113	31176	64	1	6.38e-19
Tricholoma saponaceum	QLOJ01011995.1	93.939	66	4	0	15312	15377	9061	8996	2.3e-18
Tricholoma saponaceum	QLOJ01011995.1	93.939	66	4	0	15426	15491	9175	9110	2.3e-18
Tricholoma saponaceum	QLOJ01012658.1	100	67	0	0	34136	34202	5188	5122	1.36e-25
Tricholoma saponaceum	QLOJ01012658.1	100	67	0	0	34203	34269	5255	5189	1.36e-25
Tricholoma saponaceum	QLOJ01011995.1	100	68	0	0	24417	24484	29044	29111	3.79e-26
Tricholoma saponaceum	QLOJ01012191.1	100	69	0	0	24495	24563	1	69	1.05e-26
Tricholoma saponaceum	QLOJ01012658.1	95.714	70	3	0	89552	89621	1633	1564	2.95e-22
Tricholoma saponaceum	QLOJ01012658.1	95.714	70	3	0	24423	24492	1564	1633	2.95e-22
Tricholoma saponaceum	QLOJ01011995.1	100	70	0	0	89558	89627	1	70	2.93e-27
Tricholoma saponaceum	QLOJ01013908.1	100	70	0	0	89481	89550	70	1	2.93e-27
Tricholoma saponaceum	QLOJ01000182.1	97.368	76	2	0	39107	39182	12971	12896	2.93e-27
Tricholoma saponaceum	QLOJ01006307.1	100	79	0	0	81199	81277	377	299	2.91e-32
Tricholoma saponaceum	QLOJ01012658.1	98.765	81	0	1	24254	24333	33583	33663	3.76e-31
Tricholoma saponaceum	QLOJ01011995.1	98.765	81	0	1	63107	63187	233	154	3.76e-31
Tricholoma saponaceum	QLOJ01003158.1	98.851	87	1	0	57699	57785	2498	2412	4.83e-35
Tricholoma saponaceum	QLOJ01011995.1	85.393	89	7	6	1572	1654	21806	21718	1.79e-14
Tricholoma saponaceum	QLOJ01004951.1	96.667	90	3	0	57696	57785	2091	2180	2.25e-33
Tricholoma saponaceum	QLOJ01012657.1	89.247	93	5	4	84258	84350	7314	7401	1.06e-21
Tricholoma saponaceum	QLOJ01011995.1	95.082	122	4	2	15312	15432	9118	8998	1.32e-45
Tricholoma saponaceum	QLOJ01011995.1	95.082	122	4	2	15369	15489	9175	9055	1.32e-45
Tricholoma saponaceum	QLOJ01012658.1	91.667	168	7	5	90831	90993	38426	38591	3.63e-56
Tricholoma saponaceum	QLOJ01011995.1	91.667	168	7	5	67950	68115	27840	27678	3.63e-56
Tricholoma saponaceum	QLOJ01014146.1	100	206	0	0	29288	29493	1	206	7.32e-103
Tricholoma saponaceum	QLOJ01014146.1	100	206	0	0	76599	76804	1	206	7.32e-103
Tricholoma saponaceum	QLOJ01012549.1	97.768	224	3	2	29064	29287	7102	7323	5.66e-104
Tricholoma saponaceum	QLOJ01012658.1	93.191	235	12	3	51219	51450	16636	16869	3.45e-91
Tricholoma saponaceum	QLOJ01012658.1	93.191	235	12	3	46185	46418	21670	21901	3.45e-91
Tricholoma saponaceum	QLOJ01011120.1	98.305	236	4	0	57707	57942	1224	1459	7.22e-113
Tricholoma saponaceum	QLOJ01003503.1	98.305	236	4	0	57707	57942	1392	1627	7.22e-113
Tricholoma saponaceum	QLOJ01013908.1	96.52	431	11	4	76377	76804	4571	5000	0
Tricholoma saponaceum	QLOJ01003496.1	97.576	495	6	1	68857	69345	2231	2725	0
Tricholoma saponaceum	QLOJ01011995.1	99.83	588	0	1	93675	94261	25074	24487	0
Tricholoma saponaceum	QLOJ01012658.1	74.923	650	133	25	76861	77498	1	632	1.65e-69
Tricholoma saponaceum	QLOJ01012657.1	74.962	651	131	25	29550	30181	1	638	1.65e-69
Tricholoma saponaceum	QLOJ01003767.1	82.09	871	142	14	11053	11915	865	1	0
Tricholoma saponaceum	QLOJ01012658.1	99.327	2525	17	0	29550	32074	1	2525	0
Tricholoma saponaceum	QLOJ01011995.1	100	4119	0	0	89560	93678	29111	24993	0
Tricholoma saponaceum	QLOJ01013908.1	99.8	5001	8	2	24494	29493	1	5000	0
Tricholoma saponaceum	QLOJ01012191.1	100	5227	0	0	84323	89549	5227	1	0
Tricholoma saponaceum	QLOJ01012658.1	95.999	6299	208	30	31329	37605	8056	1780	0
Tricholoma saponaceum	QLOJ01012549.1	100	7323	0	0	69276	76598	1	7323	0
Tricholoma saponaceum	QLOJ01012657.1	100	7411	0	0	76861	84271	1	7411	0
Tricholoma saponaceum	QLOJ01011995.1	100	24486	0	0	1	24486	24486	1	0
Tricholoma saponaceum	QLOJ01012658.1	99.871	32436	17	1	36866	69276	7317	39752	0
Tricholoma terreum	QFEU01002444.1	100	32	0	0	14719	14750	2808	2777	5.05e-06
Tricholoma terreum	QFEU01004713.1	100	33	0	0	8773	8805	5669	5637	1.4e-06
Tricholoma terreum	QFEU01006595.1	97.143	35	1	0	54776	54810	10597	10563	5.05e-06
Tricholoma terreum	QFEU01001254.1	97.143	35	1	0	54776	54810	1178	1144	5.05e-06
Tricholoma terreum	QFEU01003212.1	100	35	0	0	12272	12306	87	121	1.09e-07
Tricholoma terreum	QFEU01011567.1	97.222	36	1	0	64641	64676	5093	5128	1.4e-06
Tricholoma terreum	QFEU01023966.1	100	38	0	0	37664	37701	860	897	2.33e-09
Tricholoma terreum	QFEU01000867.1	100	38	0	0	32689	32726	22419	22456	2.33e-09
Tricholoma terreum	QFEU01003212.1	100	42	0	0	64577	64618	119	160	1.39e-11
Tricholoma terreum	QFEU01004104.1	91.111	45	2	2	8105	8147	27070	27026	5.05e-06
Tricholoma terreum	QFEU01003136.1	95.652	46	2	0	27696	27741	20243	20288	1.8e-10
Tricholoma terreum	QFEU01003136.1	95.652	46	2	0	19579	19624	20288	20243	1.8e-10
Tricholoma terreum	QFEU01003487.1	100	50	0	0	28382	28431	14433	14384	4.98e-16
Tricholoma terreum	QFEU01024790.1	98.039	51	0	1	10181	10230	10687	10737	2.32e-14
Tricholoma terreum	QFEU01006595.1	100	53	0	0	45478	45530	10458	10510	1.07e-17
Tricholoma terreum	QFEU01001254.1	98.113	53	1	0	45478	45530	1039	1091	4.98e-16
Tricholoma terreum	QFEU01011241.1	100	56	0	0	37259	37314	1025	970	2.3e-19
Tricholoma terreum	QFEU01004104.1	96.552	58	1	1	2657	2714	27172	27116	1.38e-16
Tricholoma terreum	QFEU01000867.1	98.361	61	0	1	17510	17569	22420	22360	6.39e-20
Tricholoma terreum	QFEU01000368.1	95.082	61	3	0	77152	77212	5668	5728	3.85e-17
Tricholoma terreum	QFEU01024212.1	93.548	62	4	0	37525	37586	595	534	4.98e-16
Tricholoma terreum	QFEU01023746.1	96.875	64	1	1	37605	37668	554	492	6.39e-20
Tricholoma terreum	QFEU01004104.1	98.438	64	1	0	64955	65018	27304	27241	3.82e-22
Tricholoma terreum	QFEU01003487.1	98.438	64	0	1	71223	71285	14493	14430	1.37e-21
Tricholoma terreum	QFEU01009384.1	94.03	67	1	3	34662	34725	4130	4064	1.07e-17
Tricholoma terreum	QFEU01006232.1	92.754	69	5	0	70813	70881	15578	15646	2.98e-18
Tricholoma terreum	QFEU01009413.1	100	71	0	0	76829	76899	6897	6967	1.06e-27
Tricholoma terreum	QFEU01009813.1	98.592	71	1	0	6344	6414	442	372	4.91e-26
Tricholoma terreum	QFEU01004802.1	100	72	0	0	55146	55217	2034	1963	2.93e-28
Tricholoma terreum	QFEU01024556.1	100	77	0	0	37182	37258	1210	1134	4.87e-31
Tricholoma terreum	QFEU01002923.1	93.671	79	5	0	12380	12458	7581	7659	8.21e-24
Tricholoma terreum	QFEU01024105.1	96.471	85	3	0	41671	41755	233	149	1.75e-30
Tricholoma terreum	QFEU01024105.1	96.471	85	3	0	47259	47343	5821	5737	1.75e-30
Tricholoma terreum	QFEU01024052.1	100	85	0	0	27593	27677	1	85	1.74e-35
Tricholoma terreum	QFEU01010592.1	96.552	87	3	0	37313	37399	1440	1526	1.36e-31
Tricholoma terreum	QFEU01006595.1	96.739	92	2	1	46880	46970	10366	10457	8.1e-34
Tricholoma terreum	QFEU01008856.1	93.75	96	6	0	64760	64855	96	1	1.36e-31
Tricholoma terreum	QFEU01001254.1	94.792	96	4	1	46876	46970	943	1038	1.05e-32
Tricholoma terreum	QFEU01002078.1	93.75	96	6	0	8023	8118	13216	13121	1.36e-31
Tricholoma terreum	QFEU01004802.1	100	100	0	0	69235	69334	1811	1910	7.98e-44
Tricholoma terreum	QFEU01001938.1	97.143	105	3	0	38469	38573	11849	11745	1.34e-41
Tricholoma terreum	QFEU01001343.1	93.458	107	7	0	11422	11528	17436	17330	4.84e-36
Tricholoma terreum	QFEU01023746.1	99.091	110	1	0	27678	27787	2627	2518	1.03e-47
Tricholoma terreum	QFEU01000867.1	99.091	110	1	0	19533	19642	22783	22674	1.03e-47
Tricholoma terreum	QFEU01024569.1	98.246	114	2	0	37721	37834	488	601	2.85e-48
Tricholoma terreum	QFEU01003641.1	95.763	118	5	0	8001	8118	1	118	1.72e-45
Tricholoma terreum	QFEU01025226.1	100	132	0	0	80574	80705	1	132	1.3e-61
Tricholoma terreum	QFEU01008856.1	94.03	134	8	0	67784	67917	227	94	2.2e-49
Tricholoma terreum	QFEU01007357.1	89.051	137	15	0	67794	67930	290	154	2.24e-39
Tricholoma terreum	QFEU01006826.1	92.254	142	10	1	37259	37399	353	212	2.85e-48
Tricholoma terreum	QFEU01021742.1	91.549	142	11	1	37259	37399	819	960	1.33e-46
Tricholoma terreum	QFEU01002923.1	93.333	150	10	0	12235	12384	1	150	6.09e-55
Tricholoma terreum	QFEU01022868.1	78.659	164	30	5	16022	16181	2376	2538	2.3e-19
Tricholoma terreum	QFEU01006356.1	98.256	172	3	0	17210	17381	2675	2846	7.6e-79
Tricholoma terreum	QFEU01024790.1	86.022	186	16	8	54159	54340	2357	2536	1.72e-45
Tricholoma terreum	QFEU01022868.1	77.778	207	36	10	16131	16331	2267	2469	8.21e-24
Tricholoma terreum	QFEU01021282.1	84.862	218	25	5	47933	48146	1306	1093	3.66e-52
Tricholoma terreum	QFEU01000867.1	98.734	237	3	0	37259	37495	21747	21983	5.59e-115
Tricholoma terreum	QFEU01019635.1	86.923	260	17	9	11742	12000	1	244	4.61e-71
Tricholoma terreum	QFEU01024002.1	100	284	0	0	80252	80535	1	284	4.14e-146
Tricholoma terreum	QFEU01003015.1	88.591	298	28	2	23107	23404	447	156	1.6e-95
Tricholoma terreum	QFEU01023374.1	100	332	0	0	79920	80251	1	332	8.59e-173
Tricholoma terreum	QFEU01023566.1	100	335	0	0	77548	77882	335	1	1.85e-174
Tricholoma terreum	QFEU01013747.1	98.841	345	3	1	37259	37603	1428	1085	8.59e-173
Tricholoma terreum	QFEU01006717.1	96.812	345	10	1	37259	37603	1334	991	4.06e-161
Tricholoma terreum	QFEU01002316.1	97.983	347	6	1	37257	37603	189	534	6.69e-169
Tricholoma terreum	QFEU01024121.1	100	349	0	0	33865	34213	349	1	0
Tricholoma terreum	QFEU01007357.1	80.857	350	46	18	66480	66829	619	291	6e-65
Tricholoma terreum	QFEU01023980.1	100	401	0	0	13356	13756	401	1	0
Tricholoma terreum	QFEU01000867.1	99.767	430	0	1	37490	37918	22244	22673	0
Tricholoma terreum	QFEU01024052.1	76.211	454	101	6	23181	23629	971	520	2.81e-58
Tricholoma terreum	QFEU01000867.1	94.336	459	4	3	27480	27937	22476	22913	0
Tricholoma terreum	QFEU01024790.1	79.317	527	99	7	23107	23629	4987	4467	1.24e-96
Tricholoma terreum	QFEU01023142.1	100	591	0	0	60020	60610	1	591	0
Tricholoma terreum	QFEU01024569.1	100	601	0	0	26993	27593	1	601	0
Tricholoma terreum	QFEU01024399.1	100	688	0	0	16341	17028	688	1	0
Tricholoma terreum	QFEU01025294.1	100	694	0	0	5562	6255	63	756	0
Tricholoma terreum	QFEU01004517.1	80.25	800	150	7	32369	33164	4	799	3.11e-167
Tricholoma terreum	QFEU01023693.1	100	803	0	0	60611	61413	1	803	0
Tricholoma terreum	QFEU01024790.1	82.54	882	129	18	38352	39220	4466	5335	0
Tricholoma terreum	QFEU01022710.1	100	1026	0	0	74544	75569	1	1026	0
Tricholoma terreum	QFEU01023284.1	100	1089	0	0	67617	68705	1	1089	0
Tricholoma terreum	QFEU01025226.1	100	1369	0	0	1	1369	133	1501	0
Tricholoma terreum	QFEU01024871.1	100	1451	0	0	58569	60019	1451	1	0
Tricholoma terreum	QFEU01022694.1	100	1635	0	0	75710	77344	1635	1	0
Tricholoma terreum	QFEU01023423.1	100	1709	0	0	30122	31830	1709	1	0
Tricholoma terreum	QFEU01024052.1	100	1711	0	0	37834	39544	1	1711	0
Tricholoma terreum	QFEU01023805.1	100	1729	0	0	61491	63219	1729	1	0
Tricholoma terreum	QFEU01023966.1	100	1945	0	0	31830	33774	1	1945	0
Tricholoma terreum	QFEU01023385.1	100	2010	0	0	39520	41529	2010	1	0
Tricholoma terreum	QFEU01023492.1	100	2064	0	0	77882	79945	1	2064	0
Tricholoma terreum	QFEU01024315.1	100	2100	0	0	11265	13364	1	2100	0
Tricholoma terreum	QFEU01024790.1	99.87	2302	2	1	27821	30122	2301	1	0
Tricholoma terreum	QFEU01022868.1	100	2541	0	0	13756	16296	1	2541	0
Tricholoma terreum	QFEU01025187.1	100	2691	0	0	68822	71512	1	2691	0
Tricholoma terreum	QFEU01025294.1	100	2887	0	0	34244	37130	3642	756	0
Tricholoma terreum	QFEU01023704.1	100	2906	0	0	71639	74544	1	2906	0
Tricholoma terreum	QFEU01022739.1	100	3464	0	0	47610	51073	3464	1	0
Tricholoma terreum	QFEU01023649.1	100	4165	0	0	1397	5561	1	4165	0
Tricholoma terreum	QFEU01024454.1	100	4297	0	0	63308	67604	1	4297	0
Tricholoma terreum	QFEU01024790.1	100	4851	0	0	6414	11264	6961	11811	0
Tricholoma terreum	QFEU01024105.1	100	5963	0	0	41529	47491	5963	1	0
Tricholoma terreum	QFEU01024734.1	100	7391	0	0	51189	58579	7391	1	0
Tricholoma terreum	QFEU01023746.1	100	9941	0	0	17016	26956	1	9941	0

## Sheet: Table S9
Table S9 Species, and GenBank accession number used for phylogenetic analysis in this study
ID	Species	GenBank accession number	Order
Asty	Annulohypoxylon stygium	KF545917	Xylariales (outgroup)
Cgat	Cryptococcus gattii	CP025773	Tremellales
Cneo	Cryptococcus neoformans	AY101381
Tfuc	Tremella fuciformis	MF422647
Tasa	Trichosporon asahii	JH925097	Trichosporonales
Jang	Jaminaea angkorensis	KC628747	Microstromatales
Umay	Ustilago maydis	DQ157700	Ustilaginales
Tind	Tilletia indica	DQ993184	Tilletiales
Twal	Tilletia walkeri	EF536375
Mvio	Microbotryum cf. violaceum	KC285587	Microbotryales
Mlyc	Microbotryum lychnidis-dioicae	KC285586
Rmuc	Rhodotorula mucilaginosa	MF694646	Sporidiobolales
Pmei	Phakopsora meibomiae	GQ338834	Pucciniales
Ppac	Phakopsora pachyrhizi	GQ332420
Abis	Agaricus bisporus	JX271275	Agaricales
Ccin	Coprinopsis cinerea	NW_003307477
Lame	Laccaria amethystina	MK697669
Lbic	Laccaria bicolor	MK697670
Ldec	Lyophyllum decastes	MH447974
Lshi	Lyophyllum shimeji	MH447975
SCYJ1	Tricholoma matsutake SCYJ1	MN873034
Tmat	Tricholoma matsutake (Korea)	JX985789
TmatY1	Tricholoma matsutake Y-1 (Japan)	LC385608
Tbak	Tricholoma bakamatsutake	MN873035
Tfla	Tricholoma flavovirens	MN873037
Tsap	Tricholoma saponaceum	MN873038
Tter	Tricholoma terreum	MN873036
Abor	Armillaria borealis	MH407470
Asol	Armillaria solidipes	MH660713
Dtab	Desarmillaria tabescens	MH823225
Asin	Armillaria sinapina	MH282847
Fvel	Flammulina velutipes	JF799107
Ledo	Lentinula edodes	AB697988
Mper	Moniliophthora perniciosa	AY376688
Mror	Moniliophthora roreri	HQ259115
Scom	Schizophyllum commune	AF402141
Pcit	Pleurotus citrinopileatus	MG017444
Pery	Pleurotus eryngii	KX827267
Post	Pleurotus ostreatus	EF204913
Ppla	Pleurotus platypus	MG017445
Hrus	Hygrophorus russula	MH643589
Hcor	Hericium coralloides	KY007042	Russulales
Ldel	Lactarius deliciosus	MH319478
Lhat	Lactarius hatsudake	MH319475
Lhyg	Lactarius hygrophoroides	MH319477
Lpip	Lactarius piperatus	MH319479
Lvol	Lactarius volemus	MH319474
Rabi	Russula abietina	MH138073
Rlep	Russula lepida	MH138075
Rcom	Russula compacta	MH138072
Rfoe	Russula foetens	MH138074
Rvir	Russula virecsens	MH138076
Hirr	Heterobasidion irregulare	KF957635
Fpal	Fomitopsis palustris	AP017926	Polyporales
Gapp	Ganoderma applanatum	KR109212
Gleu	Ganoderma leucocontextum	MH252534
Gtsu	Ganoderma tsugae	MH252533
Gcal	Ganoderma calidophilum	MH252535
Gluc	Ganoderma lucidum	KC763799
Gmer	Ganoderma meredithae	KP410262
Gsin	Ganoderma sinense	KF673550
Tcin	Trametes cingulata	GU723273
Prad	Phlebia radiata	HE613568
Lsul	Laetiporus sulphureus	MG519331
Capp	Cantharellus appalachiensis	MG602716	Cantharellales
Ccib	Cantharellus cibarius	KC573037
Clut	Cantharellus lutescens	MG602719
Rsol	Rhizoctonia solani	KC352446
